# Supplementary material for: Stability assessment of degrading permafrost rock slopes based on a coupled thermo-mechanical model
Source: Copernicus journal article supplement (doi:10.5194/esurf-2020-70), 2020-09-28
Supplement: Supplementary file 1 [file esurf-2020-70-supplement.zip]

Archive with 30 entries (28 files):
- Suppl. material/Dataset S1. Joint geometrical properties_Fig. 3_Table 2.xlsx
- Suppl. material/Dataset S10. JCS and basic friction angle_Lab_Table 5.xlsx
- Suppl. material/Dataset S11. JRC_Zugspitze crest_Table 2.xlsx
- Suppl. material/Dataset S12. Size of rock samples_Table 3.xlsx
- Suppl. material/Dataset S13. Warming rock samples_Laboratory_Fig. S8.xlsx
- Suppl. material/Dataset S14. Numerical code for UDEC/
- Suppl. material/Dataset S14. Numerical code for UDEC/UniversalModel_frozen_rocktype_60degr.uddat
- Suppl. material/Dataset S14. Numerical code for UDEC/UniversalModel_frozen_rocktype_60degr_fishcode.uddat
- Suppl. material/Dataset S14. Numerical code for UDEC/UniversalModel_geometries_diffslopeangles.uddat
- Suppl. material/Dataset S14. Numerical code for UDEC/UniversalModel_jsorientation_60degrees_allorientations.dat
- Suppl. material/Dataset S14. Numerical code for UDEC/UniversalModel_jsorientation_basis_60degr.uddat
- Suppl. material/Dataset S14. Numerical code for UDEC/UniversalModel_persistence90_60degr.uddat
- Suppl. material/Dataset S14. Numerical code for UDEC/UniversalModel_persistence90_60degr_startatminus2.uddat
- Suppl. material/Dataset S14. Numerical code for UDEC/UniversalModel_warming_60degr.dat
- Suppl. material/Dataset S14. Numerical code for UDEC/Zugspitze_stages10-15_thawing.dat
- Suppl. material/Dataset S14. Numerical code for UDEC/Zugspitze_stages1-4.dat
- Suppl. material/Dataset S14. Numerical code for UDEC/Zugspitze_stages5-9_warming.dat
- Suppl. material/Dataset S14. Results_numerical model_Fig. 6,7,8,9,S9,S10,S11.xlsx
- Suppl. material/Dataset S2. Crack displacements_Zugspitze crest_Fig. S5.xlsx
- Suppl. material/Dataset S3. ERT_Fig. 4b/
- Suppl. material/Dataset S3. ERT_Fig. 4b/LIZGRIA1.LOG
- Suppl. material/Dataset S3. ERT_Fig. 4b/LIZGRIA1.S4K
- Suppl. material/Dataset S3. ERT_Fig. 4b/LIZGRIA1.TXT
- Suppl. material/Dataset S4. ER_Laboratory_Fig. S6.xlsx
- Suppl. material/Dataset S5. Topography of ERT transect_Fig. 4b.xlsx
- Suppl. material/Dataset S6. Near-surface rock temperature_Zugspitze crest_Fig. S7.xlsx
- Suppl. material/Dataset S7. Dilatational wave_Lab_Table 3.xlsx
- Suppl. material/Dataset S8. Uniaxial compressive strength_Lab_Table 3.xlsx
- Suppl. material/Dataset S9. Uniaxial tensile strength_Lab_Table 3.xlsx
- Suppl. material/Supplement_Mamot et al._ESurf.pdf
