# Supplementary material for: Stability assessment of degrading permafrost rock slopes based on a coupled thermo-mechanical model
Source: Copernicus journal article supplement (doi:10.5194/esurf-2020-70), 2020-09-28
Supplement: Supplementary file 1 [file esurf-2020-70-supplement.zip › Suppl. material/Dataset S1. Joint geometrical properties_Fig. 3_Table 2.xlsx]

## Sheet: Results
		Joint set
		K1	K2	K3	K4
Orientation	Dip direction (DIPS)	175.333	32.5	292.75	125.6
	Standard deviation [°]	20.232	2.64575	12.6062	4.50555
	Dip (DIPS)	24.3333	62.5	69.25	65.8
	Standard deviation [°]	2.88675	6.35085	3.77492	7.52994
Number of joints in joint set		15	21	37	19
True spacing	Mean [m]	0.266889	0.798617	0.536969	0.592727
	Standard deviation [m]	0.259091	0.613258	0.560871	0.689392
	Maximum [m]	0.713476	2.20392	2.48839	2.06344
	Minimum [m]	0.00157073	0.179912	0.0335452	0.0372988				defined in DIPS
							Joint Set	Scanline	Dip direction (w)	Dip (w)
Joint persistence	Mean [m]	5.12	2.4	2.48857	3.02632		K1	1	186	26
	Standard deviation [m]	12.5426	1.63258	2.31507	2.96551			4	188	21
	Maximum [m]	50	5.5	12	10			5	152	26
	Minimum [m]	0.3	0.2	0.2	0.5		K2	1	31	69
								2	36	65
Aperture	Mean [mm]	7	1.70588	2.91429	5.26471			3	33	62
	Standard deviation [mm]	17.0858	2.22246	6.75243	8.12811			5	30	54
	Maximum [mm]	65	10	40	30		K3	1	299	74
	Minimum [mm]	0	0	0.5	0			2	274	70
								3	301	65
Joint frequency	Mean [J m-1]	3.74688	1.25216	1.8623	1.68712			5	297	68
							K4	1	125	72
								2	129	57
								3	128	64
								4	118	61
								5	128	75
							K1	29.3333	Deviation of strike of joint set from trend of UDEC profile (°)
							K2	66.5
							K3	33.25
							K4	20.4
							SZ1	16
								146	Trend of UDEC profile (°)

## Sheet: Rawdata_all joints
All mapped discontinuities (included are also those which are not assigned to a specific joint set)
Nr.	Dip [°]	Dip direction [°]	Traverse	Intercept [m]			Traverse	Dip direction [°]	Dip [°]
1	18	218	1	0.1			1	190	5
2	35	152	1	0.25			2	70	0
3	85	20	1	0.5			3	155	3
4	75	30	1	0.7			4	111	4
5	27	80	1	0.7			5	233	14
6	65	240	1	1.3
7	80	200	1	1.7
8	25	185	1	1.3
9	20	160	1	0
10	43	180	1	2.2
11	67	318	1	2.65
12	72	330	1	2.4
13	75	330	1	2.3
14	25	180	1	2.7
15	82	276	1	4
16	27	201	1	4.1
17	79	4	1	4.2
18	77	164	1	4.15
19	86	311	1	4.6
20	59	342	1	5.05
21	57	53	1	5.2
22	50	340	1	5
23	55	1	1	4.9
24	17	357	1	5.6
25	38	183	1	5.9
26	71	348	1	4.4
27	63	24	1	2.75
28	65	10	1	5.6
29	67	290	1	6.3
30	65	170	1	6.1
31	75	296	1	5.6
32	35	220	1	7.9
33	75	144	1	7.9
34	72	130	1	7.8
35	25	348	1	7.8
36	76	144	1	7.65
37	77	30	1	7.6
38	72	106	1	7.1
39	65	26	1	7.1
40	33	242	2	0.75
41	89	112	2	1.1
42	65	281	2	1.25
43	81	279	2	1.55
44	60	40	2	1.9
45	75	273	2	2
46	85	282	2	2.3
47	70	32	2	2.15
48	70	260	2	2.67
49	64	264	2	2.8
50	85	290	2	3.05
51	61	266	2	3.1
52	45	129	2	3.36
53	47	142	2	3
54	73	119	2	3.6
55	63	130	2	4
56	80	183	2	4.8
57	81	256	2	6
58	45	77	2	6.9
59	58	277	2	7.8
60	65	280	2	7.3
61	62	275	2	9
62	89	55	2	9.3
63	81	235	2	8.95
64	77	296	3	0.7
65	60	38	3	0.56
66	63	41	3	1.7
67	85	106	3	1.9
68	66	286	3	2.85
69	85	220	3	3.8
70	65	25	3	3.4
71	73	353	3	3.95
72	60	24	3	4.2
73	62	334	3	4.2
74	45	282	3	5.2
75	89	301	3	5.85
76	56	132	3	6.1
77	55	300	3	6.7
78	77	344	3	7.65
79	58	320	3	7.2
80	84	127	3	8.07
81	70	298	3	8.85
82	65	358	3	9.2
83	50	142	3	9.2
84	21	120	3	9.8
85	76	345	3	9.6
86	83	305	4	3.15
87	80	283	4	3.35
88	58	122	4	3.6
89	75	213	4	3.5
90	60	120	4	3.7
91	65	111	4	3.8
92	22	184	4	3.6
93	27	179	4	3.45
94	20	198	4	3.3
95	17	196	4	3.2
96	70	4	5	0.3
97	67	127	5	0.38
98	60	33	5	1.05
99	81	300	5	1.5
100	66	269	5	1.95
101	40	46	5	1.7
102	69	64	5	2.2
103	76	67	5	2.55
104	45	301	5	2.8
105	40	44	5	2.9
106	53	47	5	3.15
107	53	23	5	3.45
108	83	305	5	4.05
109	85	136	5	3.4
110	48	52	5	4.2
111	73	22	5	4.55
112	76	261	5	4.6
113	84	245	5	5.2
114	80	254	5	5.4
115	89	264	5	5.5
116	61	19	5	5.7
117	68	346	5	6.2
118	65	92	5	6.75
119	28	158	5	7.2
120	85	68	5	7.8
121	80	62	5	7.7
122	89	63	5	7.9
123	61	298	5	8.75
124	77	79	5	8.7
125	83	68	5	9.2
126	77	316	5	8.9
127	78	88	5	10.2
128	78	106	5	10.15
129	67	278	5	10.1
130	76	245	5	10.5
131	69	84	5	11.5
132	66	86	5	11.25
133	70	131	5	11.15
134	62	308	5	10.4
135	24	145	5	9.7

## Sheet: Merge_II
Intercept [m]	Dip direction [°]	Dip [°]	Trace length above scanline [m]	Trace length below scanline [m]	Total trace length [m]	Traverse	Joint Set	Measured apparent spacing [m]	True spacing [m]	Aperture [mm]
0	160	20			4	1	K1			2
0.1	218	18			2	1	K1	0.1	0.0356738	1
0.25	152	35			1	1	K1	0.15	0.0535107	2
1.3	185	25			1.4	1	K1	1.05	0.374575	2
2.2	180	43			1	1	K1	0.9	0.321064	15
2.7	180	25			1.5	1	K1	0.5	0.178369	2
4.1	201	27			4	1	K1	1.4	0.499433	2
5.9	183	38			0.3	1	K1	1.8	0.642128	65
7.9	220	35			50	1		2	0.713476
3.2	196	17			1	4	K1			1.5
3.3	198	20			1	4	K1	0.1	0.00157073	1.5
3.45	179	27			1	4	K1	0.15	0.0023561	1.5
3.6	184	22			1	4	K1	0.15	0.0023561	1.5
7.2	158	28	4	3	7	5	K1			1
9.7	145	24	0.1	0.5	0.6	5	K1	2.5	0.378152	0
0.5	20	85			0.7	1	K2			1.5
0.7	30	75				1	K2	0.2	0.179912	0.5
2.75	24	63				1	K2	2.05	1.84409	2
5.2	53	57			0.7	1	K2	2.45	2.20392
7.1	26	65				1	K2	1.9	1.70916
7.6	30	77				1	K2	0.5	0.449779
1.9	40	60	3	1	4	2	K2			1
2.15	32	70	3	1.5	4.5	2	K2	0.25	0.187816	2.5
0.56	38	60	1.5	1.1	2.6	3	K2			1
1.7	41	63	0	3	3	3	K2	1.14	0.729725	10
3.4	25	65	3	0.5	3.5	3	K2	1.7	1.08819	1
4.2	24	60	0.4	1.5	1.9	3	K2	0.8	0.512088	1
0.3	4	70	3	0.1	3.1	5	K2			1.5
1.05	33	60	1.5	4	5.5	5	K2	0.75	0.648864	1
1.7	46	40	1.5	0	1.5	5	K2	0.65	0.562348	0
2.9	44	40	1	0.5	1.5	5	K2	1.2	1.03818	0.5
3.15	47	53	4	0.2	4.2	5	K2	0.25	0.216288	1
3.45	23	53	0.1	0.1	0.2	5	K2	0.3	0.259545
4.2	52	48	0.5	0	0.5	5	K2	0.75	0.648864	1
4.55	22	73	0	1	1	5	K2	0.35	0.302803	1.5
5.7	19	61				5	K2	1.15	0.994924	2
2.3	330	75			0.45	1	K3			1.5
2.4	330	72			0.45	1	K3	0.1	0.0335452	1.5
2.65	318	67			0.45	1	K3	0.25	0.0838629	1.5
4	276	82				1	K3	1.35	0.45286
4.6	311	86			4.5	1	K3	0.6	0.201271	10
5.6	296	75			6	1	K3	1	0.335452	40
6.3	290	67				1	K3	0.7	0.234816	4
1.25	281	65	1.5	0.7	2.2	2	K3			0.5
1.55	279	81	2	0.05	2.05	2	K3	0.3	0.257419	7.5
2	273	75	0.15	0.15	0.3	2	K3	0.45	0.386129	1
2.3	282	85	2.5	1.1	3.6	2	K3	0.3	0.257419	1.5
2.67	260	70	2	1	3	2	K3	0.37	0.317484	1
2.8	264	64	1.5	1	2.5	2	K3	0.13	0.111548	1
3.05	290	85	1	0.5	1.5	2	K3	0.25	0.214516	2
3.1	266	61	1	0	1	2	K3	0.05	0.0429032	1
6	256	81	2.5	1.5	4	2	K3	2.9	2.48839	1
7.3	280	65	2.5	0.5	3	2	K3	1.3	1.11548	0.5
7.8	277	58	5	7	12	2	K3	0.5	0.429032	1
9	275	62	2	1	3	2	K3	1.2	1.02968	1
0.7	296	77	4	0.8	4.8	3	K3			5
2.85	286	66	0.6	0.6	1.2	3	K3	2.15	1.8525	1
4.2	334	62	0.6	1	1.6	3		1.35	1.1632	1
5.2	282	45	0.2	0.7	0.9	3	K3	1	0.861629
5.85	301	89	0.1	1	1.1	3	K3	0.65	0.560059	0.5
6.7	300	55	0	1	1	3	K3	0.85	0.732385	1
7.2	320	58	2	1	3	3	K3	0.5	0.430815	1.5
8.85	298	70	1	0.5	1.5	3	K3	1.65	1.42169	1
1.5	300	81	0.4	0	0.4	5	K3			1
1.95	269	66	5	0	5	5	K3	0.45	0.136815	0.5
2.8	301	45	0.1	0.1	0.2	5	K3	0.85	0.258428	1
4.05	305	83	0.5	2.5	3	5	K3	1.25	0.380041	1
4.6	261	76	0.4	0.8	1.2	5	K3	0.55	0.167218	1
5.5	264	89	0.2	0.2	0.4	5	K3	0.9	0.27363	2
8.75	298	61	2	3.5	5.5	5	K3	3.25	0.988107	3
8.9	316	77	0.4	0.4	0.8	5	K3	0.15	0.045605	1
10.1	278	67	3	0.2	3.2	5	K3	1.2	0.36484	2
10.4	308	62	1.5	0.8	2.3	5	K3	0.3	0.0912099	1
7.1	106	72			10	1	K4
7.65	144	76			0.5	1	K4	0.55	0.205143	10
7.8	130	72			1	1	K4	0.15	0.0559482	20
7.9	144	75			0.5	1	K4	0.1	0.0372988	5
1.1	112	89	0.4	1.7	2.1	2	K4			0
3	142	47	1.1	0.5	1.6	2	K4	1.9	0.820963	0
3.36	129	45	0.7	0.3	1	2	K4	0.36	0.155551	0
3.6	119	73	1	0.5	1.5	2	K4	0.24	0.103701	0
1.9	106	85	2.5	0	2.5	3	K4			0
6.1	132	56	2.5	5	7.5	3	K4	4.2	1.99117	30
8.07	127	84	4	1.2	5.2	3	K4	1.97	0.933954	1
9.2	142	50	1.2	1	2.2	3	K4	1.13	0.53572
3.6	122	58			2	4	K4			3
3.7	120	60			2	4	K4	0.1	0.0831954	4
3.8	111	65			3	4	K4	0.1	0.0831954	7.5
0.38	127	67	0.4	1	1.4	5	K4			2.5
3.4	136	85	0.5	0.5	1	5	K4	3.02	0.9232	1.5
10.15	106	78	5	5	10	5	K4	6.75	2.06344	2.5
11.15	131	70	1	1.5	2.5	5	K4	1	0.305695	2.5
4	130	63	25	25	50	2	SZ1/K4	0.4	0.172834	270
					3.05647			1.02053	0.563123	3.83735	Mean
					1.9			0.725	0.369707	1.5	Median

## Sheet: K1_SL1
		Dip direction	Dip
	Orientation scanline 1	190	5
	Orientation K1m	186	28	DIPS
	Orientation K1w	186	26
	Angle between face and strike of discontinuities (°)	20.9	0.364774
	Weighting	2.80318
Intercept [m]	Dip direction [°]	Dip [°]	Trace length above scanline [m]	Trace length below scanline [m]	Traverse	Joint set (Set 1 in DIPS)	Measured apparent spacing [m]	True spacing [m]
0	160	20			1	K1	-	-
0.1	218	18			1	K1	0.1	0.0356738
0.25	152	35			1	K1	0.15	0.0535107
1.3	185	25			1	K1	1.05	0.374575
2.2	180	43			1	K1	0.9	0.321064
2.7	180	25			1	K1	0.5	0.178369
4.1	201	27			1	K1	1.4	0.499433
5.9	183	38			1	K1	1.8	0.642128
7.9	220	35			1	K1	2	0.713476

## Sheet: K1_SL4
		Dip direction	Dip
	Orientation scanline 4	111	4
	Orientation K1m	188	21	DIPS
	Orientation K1w	188	21
	Minimal angle (°)	0.9	0.015708
	Weighting	63.6646
Intercept [m]	Dip direction [°]	Dip [°]	Trace length above scanline [m]	Trace length below scanline [m]	Traverse	Joint set (Set 1 in DIPS)	Measured apparent spacing [m]	True spacing [m]
3.2	196	17			4	K1
3.3	198	20			4	K1	0.1	0.00157073
3.45	179	27			4	K1	0.15	0.0023561
3.6	184	22			4	K1	0.15	0.0023561

## Sheet: K1_SL5
		Dip direction	Dip
	Orientation scanline 5	233	14
	Orientation K1m	152	26	DIPS
	Orientation K1w	152	26
	Minimal angle (°)	8.7	0.151844
	Weighting	6.6111
Intercept [m]	Dip direction [°]	Dip [°]	Trace length above scanline [m]	Trace length below scanline [m]	Traverse	Joint set (Set 1 in DIPS)	Measured apparent spacing [m]	True spacing [m]
7.2	158	28	4	3	5	K1
9.7	145	24	0.1	0.5	5	K1	2.5	0.378152

## Sheet: K2_SL1
		Dip direction	Dip
	Orientation scanline 1	190	5
	Orientation K2m	30	70	DIPS
	Orientation K2w	31	69
	Minimal angle (°)	64.1	1.11876
	Weighting	1.11166
Meter at the scanline [m]	Intercept [m]	Dip [°]	Trace length above scanline [m]	Trace length below scanline [m]	Traverse	Joint set (Set 2 in DIPS)	Measured apparent spacing [m]	True spacing [m]
0.5	20	85			1	K2	-	-
0.7	30	75			1	K2	0.2	0.179912
2.75	24	63			1	K2	2.05	1.84409
5.2	53	57			1	K2	2.45	2.20392
7.1	26	65			1	K2	1.9	1.70916
7.6	30	77			1	K2	0.5	0.449779

## Sheet: K2_SL2
		Dip direction	Dip
	Orientation scanline 2	70	0	DIPS
	Orientation K2m	36	65
	Orientation K2w	36	65
	Minimal angle (°)	48.7	0.849975
	Weighting	1.33109
Meter at the scanline [m]	Intercept [m]	Dip [°]	Trace length above scanline [m]	Trace length below scanline [m]	Traverse	Joint set (Set 2 in DIPS)	Measured apparent spacing [m]	True spacing [m]
1.9	40	60	3	1	2	K2
2.15	32	70	3	1.5	2	K2	0.25	0.187816

## Sheet: K2_SL3
		Dip direction	Dip
	Orientation scanline 3	155	30
	Orientation K2m	32	62	DIPS
	Orientation K2w	33	62
	Minimal angle (°)	39.8	0.694641
	Weighting	1.56223
Intercept [m]	Dip direction [°]	Dip [°]	Trace length above scanline [m]	Trace length below scanline [m]	Traverse	Joint set (Set 2 in DIPS)	Measured apparent spacing [m]	True spacing [m]
0.56	38	60	1.5	1.1	3	K2
1.7	41	63	0	3	3	K2	1.14	0.729725
3.4	25	65	3	0.5	3	K2	1.7	1.08819
4.2	24	60	0.4	1.5	3	K2	0.8	0.512088

## Sheet: K2_SL5
		Dip direction	Dip
	Orientation scanline 5	233	14
	Orientation K2m	31	54	DIPS
	Orientation K2w	30	54
	Minimal angle (°)	59.9	1.04545
	Weighting	1.15587
Intercept [m]	Dip direction [°]	Dip [°]	Trace length above scanline [m]	Trace length below scanline [m]	Traverse	Joint set (Set 2 in DIPS)	Measured apparent spacing [m]	True spacing [m]
0.3	4	70			5	K2
1.05	33	60	1.5	4	5	K2	0.75	0.648864
1.7	46	40	1.5	0	5	K2	0.65	0.562348
2.9	44	40	1	0.5	5	K2	1.2	1.03818
3.15	47	53	4	0.2	5	K2	0.25	0.216288
3.45	23	53	0.1	0.1	5	K2	0.3	0.259545
4.2	52	48	0.5	0	5	K2	0.75	0.648864
4.55	22	73	0	1	5	K2	0.35	0.302803
5.7	19	61			5	K2	1.15	0.994924

[truncated: 10 more sheets: K3_SL1, K3_SL2, K3_SL3, K3_SL5, K4_SL1, K4_SL2, K4_SL3, K4_SL4, K4_SL5, Minimal angle]
