# Supplementary material for: Stability assessment of degrading permafrost rock slopes based on a coupled thermo-mechanical model
Source: Copernicus journal article supplement (doi:10.5194/esurf-2020-70), 2020-09-28
Supplement: Supplementary file 1 [file esurf-2020-70-supplement.zip › Suppl. material/Dataset S2. Crack displacements_Zugspitze crest_Fig. S5.xlsx]

## Sheet: Tabelle1
	Distance between the plugs [cm]																														Absolute crack displacements [cm]
Measuring section	Date																														Measuring section	Date
	2009-06-20	2009-06-29	2009-06-30	2009-07-06	2009-07-07	2009-08-01	2009-08-26	2013-09-19	2014-08-06	2014-08-14	2014-09-10	2014-09-11	2015-07-28	28.07.15 new	2015-08-12	2015-08-13	2015-08-19	2015-09-10	2015-10-01	2016-07-28	2016-08-17	2016-09-29	2017-07-13	2017-09-29	2018-06-19	19.06.18 new	2018-07-19	2018-10-11	2019-07-23			2009-06-20	2009-06-29	2009-06-30	2009-07-06	2009-07-07	2009-08-01	2009-08-26	2013-09-19	2014-08-06	2014-08-14	2014-09-10	2014-09-11	2015-07-28	2015-08-12	2015-08-13	2015-08-19	2015-09-10	2015-10-01
H1-2		589.679			589.735		589.835		587.922				587.899						587.937	588.083		588.088	588.012	588.187	588.21			588.187	588.151		H1-2					0.0565161		0.0994024		-1.91284				-0.0225764					0.0376152
H3-4		456.952			456.989	456.92	457.205	455.982	455.296						455.297				455.213	455.256		455.234	455.453	455.173	455.128			455.742	454.956		H3-4					0.0363959	-0.069304	0.285337	-1.22272	-0.685904					0.000479793				-0.0841787
H5-6		755.777			755.772	755.854	755.654	750.104	749.967						749.98				750.009	749.973		750.013	749.916	750.13	750.207			750.144	750.059		H5-6					-0.00516033	0.082796	-0.200052	-5.55012	-0.136866					0.0127004				0.0289765
H7-8		264.142			264.135	264.14	263.769	262.192	255.582						255.519				255.689	255.756		255.7	255.554	255.82	255.771			255.77	255.542		H7-8					-0.00662493	0.00535952	-0.371741	-1.5762	-6.61081					-0.0627951				0.170102
H9-10		638.28			638.482	638.248	638.44	630.804	630.719						630.837				630.757	630.73		630.664	630.658	630.851	630.875			630.909	630.85		H9-10					0.201595	-0.233408	0.192299		-0.0852749					0.118869				-0.0803524
H5-11					886.505	886.501	886.808								878.027				877.981	877.974		877.97	877.866	878.126	878.16			878.047	877.972		H5-11						-0.00382131	0.306689							-8.78117				-0.0455005
H11-12					469.489	469.465	469.585	467.61	467.515						467.496				467.485	467.427		467.434	467.317	467.487	467.523			467.483	467.429		H11-12						-0.0233094	0.120019	-1.97557	-0.0953684					-0.0183188				-0.0112195
H11-13					507.334	507.351	507.455	505.572	505.328						505.336				505.374	505.326		505.334	505.188	505.426	505.476			505.426	505.42		H11-13						0.0175887	0.10331	-1.88226	-0.24488					0.00824436				0.0381575
H14-15																655.346			655.145	655.265		655.381	655.24	655.258	655.341			655.332	655.344		H14-15																		-0.201628
H16-17																300.201			300.163	300.13		300.111	299.947	300.082	300.082			300.114	300.112		H16-17																		-0.0377859
H17-18																127.601			127.519	127.518		127.511	127.328	127.368	127.501			127.517	127.51		H17-18																		-0.0814377
H19-20																518.244			517.912	518		517.971	517.798	518.072	518.086			518.129	518.049		H19-20																		-0.332974
L1-2			689.011	689.016		689.034	688.814	687.116	686.952				686.929		686.42				686.727												L1-2				0.00508379		0.0172041	-0.219371	-1.69777	-0.164341				-0.0228497	-0.5095				0.3077
L5-6			564.584	564.733		564.644	564.687		563.009				563.036		562.977				563.03	562.994		563.013	562.864	563.266	563.241			563.125	563.02		L5-6				0.149225		-0.0892876	0.0429798		-1.6773				0.026204	-0.0590233				0.0531895
G3-4		250.204		250.163			250.061			248.492			248.415		248.771				248.407	248.361		248.322	248.212	248.411	248.408			248.453	248.382		G3-4				-0.0402544			-0.102325			-1.56909			-0.0767552	0.355611				-0.364222
G1-2		209.257		209.263			209.545			208.096			208.064	240.18	239.491				240.115	240.118		240.109	240	240.205	240.198			240.214	240.185		G1-2				0.00539236			0.281678			-1.44848			-0.0319758	-0.689338				0.624829
G5-6		551.404		551.427			551.271	549.372	549.309				549.281		549.123				549.167	549.265		549.233	549.113	549.23	549.274	538.294		538.308	538.186		G5-6				0.0235792			-0.156007	-1.89886	-0.0634489				-0.0276487	-0.15804				0.0432037
G7-8		685.612		685.728			685.574	683.645	683.672				683.683		683.57				683.617	683.592		683.495	683.501	683.722	683.597			683.748	683.65		G7-8				0.115921			-0.154308	-1.92888	0.0270051				0.0102719	-0.112889				0.047251
GR1-2	606.705			606.828			607.251						665.801		665.815				665.881	665.887		665.803	665.797	666.059	666.052			666.056	665.986		GR1-2				0.122716			0.423686							0.0140209				0.0658821
GR3-4	675.347			675.381			676.046			673.441			673.451		673.617				673.462	673.432		673.332	673.27	673.523	673.575			673.563	673.526		GR3-4				0.0339541			0.664097			-2.60475			0.010142	0.166459				-0.155859
GR5-6	910.104			910.083			911.565				908.25		908.183						908.229		908.126		908.138	908.747				908.467	908.17		GR5-6				-0.0213567			1.48202				-3.31483		-0.0665107					0.0458649
GR7-8																		87.391	87.4006	87.3965		87.3658	87.2003	87.4663	87.419			87.439	87.4086		GR7-8																		0.00959169
GR7-9																		100.143	100.178	100.219		100.174	100.033	100.253	100.261			100.279	100.263		GR7-9																		0.0352925
HA1-2								225.951				225.89	210.039		210.159				209.961	210.013		209.97	209.869	210.082	210.099			209.833	209.99		HA1-2												-0.0615701		0.11988				-0.198319
HA2-3								301.116				301.047			301.507				301.468	301.417		301.348	301.285	301.51	301.563			302.476	302.591		HA2-3												-0.0690124		0.459837				-0.0390795
HA4-5															178.766				178.729	178.768		178.735	178.448	178.626	178.624		197.766	197.784	197.781		HA4-5																		-0.0368617
HA4-6															356.682				356.736	356.618		356.563	356.493	356.707	356.793		320.076	320.088	320.14		HA4-6																		0.0534471
HA4-7															650.651				650.675	650.73		650.666	650.523	650.832	650.839		617.82	617.804	617.74		HA4-7																		0.0243818
LK1-2												180.69	180.386		180.66				180.395	180.382		180.351	180.182	180.363	180.381			180.262	180.235		LK1-2													-0.304061	0.273697				-0.26495
LK1-3												305.43	305.246						305.275	305.296		305.333	305.055	305.278	305.234	261.745		261.678	261.705		LK1-3													-0.184322					0.0297618
D1-2													119.387		118.968		119.405		119.389	119.258		119.362	119.18	119.429	119.425			119.433	119.417		D1-2														-0.419266		0.436925		-0.0158264
D3-4													172.089		172.049		172.068		172.027	172.05		172.02	171.849	172.069	172.094			172.068	172.044		D3-4														-0.0395515		0.0184911		-0.0405763
		new																																first measurement
[truncated: 8 more columns]
