# Supplementary material for: Stability assessment of degrading permafrost rock slopes based on a coupled thermo-mechanical model
Source: Copernicus journal article supplement (doi:10.5194/esurf-2020-70), 2020-09-28
Supplement: Supplementary file 1 [file esurf-2020-70-supplement.zip › Suppl. material/Dataset S4. ER_Laboratory_Fig. S6.xlsx]

## Sheet: ZC 9_1
Laboratory ER
Sample	ZC 9_1
Weight	Mass (dry): 23,614 kg, Mass (saturated): 23,744 kg
Distance between electrodes (m):	0.06
Comment	B1 did not work properly, results were unreliable							Overview				Arrays
Date	Time	Array	Rock temperature	Resistivity (kΩm)	Mean Resistivity (kΩm)			Resistivity (kΩm)	Rock temperature (C°)			B2		B3		B4
2015-08-10	09:19:00	2	9.31	9.293	8.49567			8.496	9.32			kΩm	T	kΩm	T	kΩm	T
2015-08-10	09:19:00	3	9.31	7.968				9.467	7.77			9.293	9.36	7.968	9.36	8.226	9.36
2015-08-10	09:19:00	4	9.31	8.226				10.062	6.58			10.079	7.77	8.85	7.77	9.471	7.77
2015-08-10	09:48:00	2	7.77	10.079	9.46667			10.688	5.6			11.029	6.58	9.504	6.58	9.652	6.58
2015-08-10	09:48:00	3	7.77	8.85				11.123	4.7			11.92	5.6	9.902	5.6	10.241	5.6
2015-08-10	09:48:00	4	7.77	9.471				11.714	3.62			12.727	4.7	10.409	4.7	10.233	4.7
2015-08-10	10:17:00	2	6.58	11.029	10.0617			12.931	2.18			13.605	9.36	10.595	9.36	10.941	9.36
2015-08-10	10:17:00	3	6.58	9.504				13.455	1.07			14.193	2.18	12.149	2.18	12.451	2.18
2015-08-10	10:17:00	4	6.58	9.652				13.966	0.26			15.025	1.07	12.628	1.07	12.713	1.07
2015-08-10	10:47:00	2	5.6	11.92	10.6877			18.546	-0.16			15.429	0.26	13.112	0.26	13.358	0.26
2015-08-10	10:47:00	3	5.6	9.902				27.72	-0.35			18.353	-0.16	18.323	-0.16	18.963	-0.16
2015-08-10	10:47:00	4	5.6	10.241				45.942	-0.96			28.045	-0.35	26.197	-0.35	28.917	-0.35
2015-08-10	11:16:00	2	4.7	12.727	11.123			67.407	-1.81			46.453	-0.96	43.021	-0.96	48.352	-0.96
2015-08-10	11:16:00	3	4.7	10.409				83.82	-2.62			68.707	-1.81	58.829	-1.81	74.685	-1.81
2015-08-10	11:16:00	4	4.7	10.233				90.175	-3.65			90.008	-2.62	71.278	-2.62	90.175	-2.62
2015-08-10	11:46:00	2	3.62	13.605	11.7137			90.175	-4.34			90.175	-3.65	90.175	-3.65	90.175	-3.65
2015-08-10	11:46:00	3	3.62	10.595				90.175	-5.04			90.175	-4.34	90.175	-4.34	90.175	-4.34
2015-08-10	11:46:00	4	3.62	10.941								90.175	-5.04	90.175	-5.04	90.175	-5.04
2015-08-10	12:27:00	2	2.18	14.193	12.931
2015-08-10	12:27:00	3	2.18	12.149
2015-08-10	12:27:00	4	2.18	12.451
2015-08-10	13:00:00	2	1.07	15.025	13.4553
2015-08-10	13:00:00	3	1.07	12.628
2015-08-10	13:00:00	4	1.07	12.713
2015-08-10	13:29:00	2	0.26	15.429	13.9663
2015-08-10	13:29:00	3	0.26	13.112
2015-08-10	13:29:00	4	0.26	13.358
2015-08-10	14:08:00	2	-0.16	18.353	18.5463
2015-08-10	14:08:00	3	-0.16	18.323
2015-08-10	14:08:00	4	-0.16	18.963
2015-08-10	14:29:00	2	-0.35	28.045	27.7197
2015-08-10	14:29:00	3	-0.35	26.197
2015-08-10	14:29:00	4	-0.35	28.917
2015-08-10	14:56:00	2	-0.96	46.453	45.942
2015-08-10	14:56:00	3	-0.96	43.021
2015-08-10	14:56:00	4	-0.96	48.352
2015-08-10	15:28:00	2	-1.81	68.707	67.407
2015-08-10	15:28:00	3	-1.81	58.829
2015-08-10	15:28:00	4	-1.81	74.685
2015-08-10	15:58:00	2	-2.62	90.008	83.8203
2015-08-10	15:58:00	3	-2.62	71.278
2015-08-10	15:58:00	4	-2.62	90.175
2015-08-10	16:33:00	2	-3.65	90.175	90.175
2015-08-10	16:33:00	3	-3.65	90.175
2015-08-10	16:33:00	4	-3.65	90.175
2015-08-10	16:59:00	2	-4.34	90.175	90.175
2015-08-10	16:59:00	3	-4.34	90.175
2015-08-10	16:59:00	4	-4.34	90.175
2015-08-10	17:25:00	2	-5.04	90.175	90.175
2015-08-10	17:25:00	3	-5.04	90.175
2015-08-10	17:25:00	4	-5.04	90.175

## Sheet: ZC 9_2
Laboratory ER
Sample	ZC 9_2
Weight	Mass (dry): 28,409 kg, Mass (saturated): 28,447 kg
Distance between electrodes (m):	0.06
								Overview				Arrays
Date	Time	Array	Rock temperature	Resistivity (kΩm)	Mean Resistivity (kΩm)			Resistivity (kΩm)	Temperature (C°)			A1		A2		A3		A4
2015-08-12	08:11:00	1	9.6	9.427	10.6753			10.675	9.6			kΩm	T	kΩm	T	kΩm	T	kΩm	T
2015-08-12	08:11:00	2	9.6	10.842				11.877	8.4			9.427	9.6	10.842	9.6	10.338	9.6	12.094	9.6
2015-08-12	08:11:00	3	9.6	10.338				11.781	7.51			10.407	8.4	12.089	8.4	11.546	8.4	13.467	8.4
2015-08-12	08:11:00	4	9.6	12.094				12.632	6.45			10.961	7.51	11.248	7.51	11.549	7.51	13.366	7.51
2015-08-12	08:52:00	1	8.4	10.407	11.8773			12.93	5.44			13.073	6.45	10.901	6.45	12.754	6.45	13.798	6.45
2015-08-12	08:52:00	2	8.4	12.089				13.39	4.47			12.877	5.44	10.992	5.44	13.625	5.44	14.225	5.44
2015-08-12	08:52:00	3	8.4	11.546				14.135	3.53			13.465	4.47	11.251	9.6	13.86	9.6	14.982	9.6
2015-08-12	08:52:00	4	8.4	13.467				14.079	2.52			14.272	3.53	11.669	3.53	15.099	3.53	15.501	3.53
2015-08-12	09:17:00	1	7.51	10.961	11.781			15.066	1.64			12.812	2.52	12.066	2.52	15.521	2.52	15.915	2.52
2015-08-12	09:17:00	2	7.51	11.248				16.185	0.73			13.567	1.64	12.837	1.64	16.518	1.64	17.341	1.64
2015-08-12	09:17:00	3	7.51	11.549				24.893	-0.24			15.042	0.73	13.169	0.73	17.681	0.73	18.846	0.73
2015-08-12	09:17:00	4	7.51	13.366				38.422	-0.93			28.407	-0.24	21.035	-0.24	24.261	-0.24	25.869	-0.24
2015-08-12	09:48:00	1	6.45	13.073	12.6315			49.312	-1.77			40.485	-0.93	34.022	-0.93	38.279	-0.93	40.903	-0.93
2015-08-12	09:48:00	2	6.45	10.901				59.067	-2.83			52.657	-1.77	43.362	-1.77	48.999	-1.77	52.231	-1.77
2015-08-12	09:48:00	3	6.45	12.754				64.984	-3.75			63.076	-2.83	52.067	-2.83	58.514	-2.83	62.612	-2.83
2015-08-12	09:48:00	4	6.45	13.798				74.022	-4.58			70.642	-3.75	57.233	-3.75	63.315	-3.75	68.746	-3.75
2015-08-12	10:18:00	1	5.44	12.877	12.9298			81.326	-5.54			76.707	-4.56	65.485	-4.56	71.918	-4.56	81.976	-4.56
2015-08-12	10:18:00	2	5.44	10.992								86.009	-5.54	72.27	-5.54	77.612	-5.54	89.414	-5.54
2015-08-12	10:18:00	3	5.44	13.625
2015-08-12	10:18:00	4	5.44	14.225
2015-08-12	10:47:00	1	4.47	13.465	13.3895
2015-08-12	10:47:00	2	4.47	11.251
2015-08-12	10:47:00	3	4.47	13.86
2015-08-12	10:47:00	4	4.47	14.982
2015-08-12	11:15:00	1	3.53	14.272	14.1353
2015-08-12	11:15:00	2	3.53	11.669
2015-08-12	11:15:00	3	3.53	15.099
2015-08-12	11:15:00	4	3.53	15.501
2015-08-12	11:47:00	1	2.52	12.812	14.0785
2015-08-12	11:47:00	2	2.52	12.066
2015-08-12	11:47:00	3	2.52	15.521
2015-08-12	11:47:00	4	2.52	15.915
2015-08-12	12:15:00	1	1.64	13.567	15.0657
2015-08-12	12:15:00	2	1.64	12.837
2015-08-12	12:15:00	3	1.64	16.518
2015-08-12	12:15:00	4	1.64	17.341
2015-08-12	12:43:00	1	0.73	15.042	16.1845
2015-08-12	12:43:00	2	0.73	13.169
2015-08-12	12:43:00	3	0.73	17.681
2015-08-12	12:43:00	4	0.73	18.846
2015-08-12	13:19:00	1	-0.24	28.407	24.893
2015-08-12	13:19:00	2	-0.24	21.035
2015-08-12	13:19:00	3	-0.24	24.261
2015-08-12	13:19:00	4	-0.24	25.869
2015-08-12	13:45:00	1	-0.93	40.485	38.4222
2015-08-12	13:45:00	2	-0.93	34.022
2015-08-12	13:45:00	3	-0.93	38.279
2015-08-12	13:45:00	4	-0.93	40.903
2015-08-12	14:14:00	1	-1.77	52.657	49.3122
2015-08-12	14:14:00	2	-1.77	43.362
2015-08-12	14:14:00	3	-1.77	48.999
2015-08-12	14:14:00	4	-1.77	52.231
2015-08-12	14:48:00	1	-2.83	63.076	59.0673
2015-08-12	14:48:00	2	-2.83	52.067
2015-08-12	14:48:00	3	-2.83	58.514
2015-08-12	14:48:00	4	-2.83	62.612
2015-08-12	15:18:00	1	-3.75	70.642	64.984
2015-08-12	15:18:00	2	-3.75	57.233
2015-08-12	15:18:00	3	-3.75	63.315
2015-08-12	15:18:00	4	-3.75	68.746
2015-08-12	15:44:00	1	-4.56	76.707	74.0215
2015-08-12	15:45:00	2	-4.58	65.485
2015-08-12	15:45:00	3	-4.58	71.918
2015-08-12	15:45:00	4	-4.58	81.976
2015-08-12	16:17:00	1	-5.54	86.009	81.3263
2015-08-12	16:17:00	2	-5.54	72.27
2015-08-12	16:17:00	3	-5.54	77.612
2015-08-12	16:17:00	4	-5.54	89.414
