# Supplementary material for: Stability assessment of degrading permafrost rock slopes based on a coupled thermo-mechanical model
Source: Copernicus journal article supplement (doi:10.5194/esurf-2020-70), 2020-09-28
Supplement: Supplementary file 1 [file esurf-2020-70-supplement.zip › Suppl. material/Dataset S5. Topography of ERT transect_Fig. 4b.xlsx]

## Sheet: ERT
Electrode	x (m)	y (m a.s.l.)	Comment
41	100	2845.77	North face
40	97.5	2847.22
39	95	2848.87
38	92.5	2850.42
37	90	2851.57
36	87.5	2853.52
35	85	2856.67
34	82.5	2860.97
33	80	2864.2
32	77.5	2865.82
31	75	2869.45
30	72.5	2872.67
29	70	2875.57
28	67.5	2876.42
27	65	2879.57
26	62.5	2881.88
25	60	2885.88
24	57.5	2888.92
23	55	2891.22
22	52.5	2893.07
21	50	2893.72	Crest
20	47.5	2891.52
19	45	2889.72
18	42.5	2888.57
17	40	2887.32
16	37.5	2885.5
15	35	2883.9
14	32.5	2882.7
13	30	2881.1
12	27.5	2879.7
11	25	2877.9
10	22.5	2876
9	20	2875.2
8	17.5	2874
7	15	2872.35
6	12.5	2870.4
5	10	2866.95
4	7.5	2863.2
3	5	2861.3
2	2.5	2858.4
1	0	2856	South face
