# Supplementary material for: Stability assessment of degrading permafrost rock slopes based on a coupled thermo-mechanical model
Source: Copernicus journal article supplement (doi:10.5194/esurf-2020-70), 2020-09-28
Supplement: Supplementary file 1 [file esurf-2020-70-supplement.zip › Suppl. material/Dataset S6. Near-surface rock temperature_Zugspitze crest_Fig. S7.xlsx]

## Sheet: iButtons
		Temperature (°C)
Date (d)	Time (h)	B1	B2	B3	B4	B7	B8	B9	Time (h)	B5	B6	B10	B11	B12
2015-08-12	07:59:00	7.1123						8.432
2015-08-12	09:59:00	7.1123						9.8755
2015-08-12	11:59:00	8.2408						11.1302
2015-08-12	13:59:00	11.1237						14.328
2015-08-12	15:59:00	12.7525						16.02
2015-08-12	17:59:00	13.7546						15.4561
2015-08-12	19:59:00	13.8799						14.5161
2015-08-12	21:59:00	12.0008						12.7608
2015-08-12	23:59:00	10.4971						11.3184
2015-08-13	01:59:00	9.3691						10.252
2015-08-13	03:59:00	8.5542						9.4362
2015-08-13	05:59:00	7.99						8.9342
2015-08-13	07:59:00	7.6139						8.9969
2015-08-13	09:59:00	7.8646						11.3184
2015-08-13	11:59:00	10.1211						14.7668				9.4743
2015-08-13	13:59:00	13.191						17.398				9.1604
2015-08-13	15:59:00	13.9425						18.4625				9.1604
2015-08-13	17:59:00	14.7565						17.5859				9.286
2015-08-13	19:59:00	14.1304						15.7693				9.4743
2015-08-13	21:59:00	12.502						14.14				9.6625
2015-08-13	23:59:00	11.1864						12.7608				9.7253
2015-08-14	01:59:00	10.1211						11.632				9.7881
2015-08-14	03:59:00	9.3064						10.7539				9.7881
2015-08-14	05:59:00	8.6169						10.0637				9.7253
2015-08-14	07:59:00	8.0527						9.6872				9.6625
2015-08-14	09:59:00	8.2408						11.4439				9.5998
2015-08-14	11:59:00	10.2465						13.8893				9.4743
2015-08-14	13:59:00	11.8755						14.7041				9.4115
2015-08-14	15:59:00	12.9404						15.0174				9.4115
2015-08-14	17:59:00	12.8778						14.2027				9.4743
2015-08-14	19:59:00	12.0008						13.137				9.537
2015-08-14	21:59:00	10.6224						11.5066				9.5998
2015-08-14	23:59:00	9.7451						10.3147				9.6625
2015-08-15	01:59:00	7.6139						8.4948				9.5998
2015-08-15	03:59:00	6.9242						7.6159				9.537
2015-08-15	05:59:00	6.6733						7.302				9.4115
2015-08-15	07:59:00	6.4225						7.0509				9.2232
2015-08-15	09:59:00	6.9242						9.499				9.0349
2015-08-15	11:59:00	8.9303						12.1337				8.9093
2015-08-15	13:59:00	10.1838						12.4473				8.8465
2015-08-15	15:59:00	9.7451						10.942				8.8465
2015-08-15	17:59:00	9.7451						10.5656				8.8465
2015-08-15	19:59:00	8.6169						9.0597				8.9093
2015-08-15	21:59:00	7.8019						8.0554				8.8465
2015-08-15	23:59:00	7.2377						7.3648				8.8465
2015-08-16	01:59:00	6.736						6.7997				8.721
2015-08-16	03:59:00	6.2971						6.3601				8.6582
2015-08-16	05:59:00	5.9208						5.8576				8.5326
2015-08-16	07:59:00	5.5445						5.3551				8.4071
2015-08-16	09:59:00	5.9835						5.9204				8.2187
2015-08-16	11:59:00	7.175						7.2392				8.0931
2015-08-16	13:59:00	8.3662						8.5576				8.0304
2015-08-16	15:59:00	9.0557						9.1852				7.9676
2015-08-16	17:59:00	8.6169						8.6203				7.9676
2015-08-16	19:59:00	8.1154						7.9926				7.9676
2015-08-16	21:59:00	7.3004						7.2392				7.9676
2015-08-16	23:59:00	6.736						6.7369				7.9676
2015-08-17	01:59:00	6.2971						6.2973				7.9048
2015-08-17	03:59:00	5.9835						5.9832				7.842
2015-08-17	05:59:00	5.6699						5.6692				7.7164
2015-08-17	07:59:00	5.2936						5.2923				7.6536
2015-08-17	09:59:00	4.7291						4.8525				7.528
2015-08-17	11:59:00	4.7918						5.2295				7.4024
2015-08-17	13:59:00	5.7954						6.4229				7.2768
2015-08-17	15:59:00	6.8615						7.2392				7.1512
2015-08-17	17:59:00	6.6733						6.7369				7.0884
2015-08-17	19:59:00	6.4225						6.5485				7.0256
2015-08-17	21:59:00	5.6072						5.6692				7.0256
2015-08-17	23:59:00	5.1054						5.1666				6.9628
2015-08-18	01:59:00	4.4154						4.4127				6.9
2015-08-18	03:59:00	3.5998						3.5329				6.8371
2015-08-18	05:59:00	3.5998						3.4701				6.7115
2015-08-18	07:59:00	3.7253						3.6586				6.6487
2015-08-18	09:59:00	4.5409						4.7269				6.5231
2015-08-18	11:59:00	6.2971						7.3648				6.4603
2015-08-18	13:59:00	7.7392						8.6831				6.3975
2015-08-18	15:59:00	8.3662						8.9969				6.3975
2015-08-18	17:59:00	7.7392						7.9926				6.5231
2015-08-18	19:59:00	5.7954						5.9832				6.5859
2015-08-18	21:59:00	5.2309						5.2923				6.6487
2015-08-18	23:59:00	4.98						4.8525				6.6487
2015-08-19	01:59:00	4.4782						4.3499				6.5859
2015-08-19	03:59:00	4.1018						3.91				6.5231
2015-08-19	05:59:00	4.039						3.7843				6.3975
2015-08-19	07:59:00	3.6626	4.3731	3.4455	3.4157			3.3444		3.5085	4.8576	6.3346
2015-08-19	09:59:00	3.6626	4.3731	3.4455	3.4157			3.2815		3.1313	4.7948	6.209
2015-08-19	11:59:00	4.4154	4.8131	4.0729	4.2314			3.9729		3.4457	4.7321	6.1462
2015-08-19	13:59:00	5.1682	5.4415	4.9512	5.0469			4.664		4.0115	4.6693	6.0205
2015-08-19	15:59:00	5.3563	5.6299	5.0767	5.2351			4.7897		4.4515	4.6693	5.9577
2015-08-19	17:59:00	5.4818	5.6928	5.1394	5.2351			4.8525		4.6401	4.6066	5.9577
2015-08-19	19:59:00	4.9173	5.1901	4.3866	4.4196			4.3499		4.1372	4.6066	5.9577
2015-08-19	21:59:00	4.3527	4.7502	3.822	3.855			3.6586		3.6343	4.6066	5.8949
2015-08-19	23:59:00	3.9135	4.436	3.3828	3.4157			3.2187		3.1313	4.6066	5.8949
2015-08-20	01:59:00	3.6626	4.2474	3.1318	3.2275			2.9044		2.9426	4.6066	5.832
2015-08-20	03:59:00	3.1606	4.0589	2.8808	2.9765			2.4015		2.8168	4.5439	5.7692
2015-08-20	05:59:00	2.8469	3.8703	2.6298	2.7255			2.1501		2.6282	4.5439	5.6436
2015-08-20	07:59:00	2.7841	3.7446	2.5043	2.6			2.1501		2.4395	4.4811	5.5807
2015-08-20	09:59:00	3.3489	4.0589	3.0063	3.353			2.7787		3.0684	4.4184	5.5179
2015-08-20	11:59:00	4.4782	4.8131	4.1357	4.5451			4.1614		4.1372	4.3556	5.4551
2015-08-20	13:59:00	5.2309	5.2529	4.7003	4.9842			4.9154		4.5773	4.3556	5.3922
2015-08-20	15:59:00	5.3563	5.2529	4.7003	4.796			4.9782		4.5144	4.2929	5.3922
2015-08-20	17:59:00	5.3563	5.0644	4.4494	4.6705			5.041		4.4515	4.2929	5.3922
2015-08-20	19:59:00	3.3489	3.7446	2.818	2.5372			3.2815		3.257	4.2929	5.3922
2015-08-20	21:59:00	2.7214	3.053	2.1905	2.0979			2.7158		2.6282	4.2929	5.3922
2015-08-20	23:59:00	2.2193	2.6129	1.6256	1.5958			2.1501		1.9992	4.2929	5.3294
2015-08-21	01:59:00	1.9055	2.2985	1.249	1.2191			1.8357		1.6218	4.2301	5.2666
2015-08-21	03:59:00	1.5917	2.0469	0.9979	0.9053			1.5213		1.3072	4.1673	5.1409
2015-08-21	05:59:00	1.2779	1.8582	0.7468	0.7169			1.2698		1.0556	4.1046	5.078
2015-08-21	07:59:00	1.4662	1.8582	0.7468	0.9053			1.3956		1.3072	4.0418	4.9524
2015-08-21	09:59:00	2.1566	1.984	0.9979	1.2819			2.7158		1.5589	3.9163	4.8267
2015-08-21	11:59:00	3.5998	2.4871	1.7511	2.4117			4.9154		2.3766	3.8536	4.7638
2015-08-21	13:59:00	5.3563	3.4302	2.9435	3.604			6.6113		3.3199	3.7908	4.701
2015-08-21	15:59:00	6.1717	4.0589	3.8847	4.6078			7.302		4.2001	3.6653	4.7638
2015-08-21	17:59:00	6.0462	4.0589	3.822	4.4823			6.7369		4.263	3.6653	4.8267
2015-08-21	19:59:00	5.2309	3.6817	3.2573	3.604			5.6692		3.6972	3.6025	4.9524
2015-08-21	21:59:00	4.2272	3.2416	2.6298	2.851			4.4755		3.0684	3.6025	5.0152
2015-08-21	23:59:00	3.2234	2.7386	1.9394	1.9724			3.2815		2.3137	3.6025	5.0152
2015-08-22	01:59:00	2.4076	2.2985	1.3118	1.2819			2.4015		1.8105	3.6025	5.0152
2015-08-22	03:59:00	1.78	1.984	0.9979	0.9053			1.7728		1.3702	3.6025	4.9524
2015-08-22	05:59:00	1.3407	1.7953	0.8096	0.7169			1.3327		1.1185	3.5398	4.8895
2015-08-22	07:59:00	1.1524	1.6696	0.6841	0.5914			1.4584		1.0556	3.477	4.8267
2015-08-22	09:59:00	1.7173	1.9211	0.8724	0.8425			5.1038		1.3702	3.477	4.701
2015-08-22	11:59:00	4.1018	2.55	1.7511	2.0979			8.1809		2.2508	3.4143	4.6381
2015-08-22	13:59:00	8.0527	3.1788	2.7553	3.2275			11.8202		3.1313	3.3515	4.6381
2015-08-22	15:59:00	9.4944	3.6817	3.6965	4.1059			12.6354		4.0115	3.2887	4.7638
2015-08-22	17:59:00	9.4944	4.4988	4.6376	4.8587			11.3811		4.9544	3.226	4.9524
2015-08-22	19:59:00	8.805	4.9388	5.0139	5.1724			10.1265		5.3314	3.226	5.2037
2015-08-22	21:59:00	6.9869	4.3731	4.0729	3.7922			7.9926		4.263	3.226	5.4551
2015-08-22	23:59:00	5.5445	3.6817	3.1945	2.6627			6.2345		3.4457	3.2887	5.5807
2015-08-23	01:59:00	4.6664	3.3674	2.7553	2.2862			5.1038		3.0684	3.2887	5.6436
2015-08-23	03:59:00	4.039	3.1788	2.5043	2.1606			4.4127		2.8168	3.3515	5.6436
2015-08-23	05:59:00	3.6626	3.1159	2.4415	2.0979			3.9729		2.6911	3.3515	5.6436
2015-08-23	07:59:00	3.6626	3.1788	2.567	2.2862			4.2242		2.8168	3.3515	5.5807
2015-08-23	09:59:00	4.1645	3.3674	2.818	2.6627			6.2345		3.0684	3.3515	5.4551
2015-08-23	11:59:00	6.1717	3.4931	2.9435	2.7882			10.0637		3.1941	3.3515	5.3922
2015-08-23	13:59:00	7.8646	3.996	3.7592	3.7922			11.0675		4.0744	3.2887	5.3922
2015-08-23	15:59:00	8.4915	4.6874	4.763	5.0469			10.942		5.0801	3.2887	5.5179
2015-08-23	17:59:00	7.8019	4.8759	4.8885	4.9215			9.4362		5.0801	3.2887	5.6436
2015-08-23	19:59:00	6.9242	4.9388	4.8258	4.6705			7.9926		4.9544	3.2887	5.832
2015-08-23	21:59:00	5.9208	4.4988	4.1984	3.9177			6.7369		4.3258	3.3515	5.8949
2015-08-23	23:59:00	5.2309	4.2474	3.822	3.4785			5.9204		4.0115	3.3515	5.9577
2015-08-24	01:59:00	4.7918	4.0589	3.5083	3.2275			5.4179		3.76	3.4143	5.9577
2015-08-24	03:59:00	4.6036	3.9331	3.3828	3.1647			5.1038		3.6343	3.4143	5.8949
2015-08-24	05:59:00	4.4782	3.8703	3.2573	3.102			4.9782		3.5714	3.477	5.832
2015-08-24	07:59:00	4.29	3.8074	3.1945	3.0392			4.7269		3.5085	3.477	5.7692
2015-08-24	09:59:00	4.8545	4.1846	3.7592	3.9804			5.9204		4.1372	3.477	5.7064
2015-08-24	11:59:00	5.7327	4.7502	4.6376	4.9842			6.7369		4.9544	3.477	5.6436
2015-08-24	13:59:00	9.181	5.1901	5.3903	5.6742			10.8793		5.6456	3.477	5.6436
2015-08-24	15:59:00	10.1211	5.5671	6.0802	5.9878			12.3846		6.274	3.477	5.7064
2015-08-24	17:59:00	10.5598	6.321	6.8955	6.4895			11.4439		7.279	3.477	5.832
2015-08-24	19:59:00	9.1184	6.3838	6.6446	6.1132			9.6245		6.9022	3.5398	6.0833
2015-08-24	21:59:00	7.9273	5.9441	5.9548	5.3606			8.3693		6.1483	3.6025	6.209
2015-08-24	23:59:00	7.175	5.6928	5.5785	5.2351			7.4904		5.897	3.6653	6.3346
2015-08-25	01:59:00	6.2971	5.4415	5.0767	4.6705			6.5485		5.3943	3.7281	6.3346
2015-08-25	03:59:00	5.1054	4.4988	3.822	3.604			5.3551		4.3887	3.7908	6.3346
2015-08-25	05:59:00	3.1606	3.1788	2.316	1.8468			3.3444		2.754	3.7908	6.3346
2015-08-25	07:59:00	2.3449	2.6758	1.8767	1.4702			2.5273		2.3137	3.8536	6.209
2015-08-25	09:59:00	1.9683	2.4242	1.8139	1.4702			2.5901		2.9426	3.8536	6.0205
2015-08-25	11:59:00	3.1606	3.4931	3.1945	2.7255			4.6012		4.1372	3.7908	5.832
2015-08-25	13:59:00	5.5445	5.0644	5.0767	4.9842			6.4229		5.3943	3.7281	5.7064
2015-08-25	15:59:00	6.4852	5.6928	5.5785	5.5487			6.9253		5.52	3.6653	5.6436
2015-08-25	17:59:00	6.3598	5.4415	5.3276	5.3606			6.9253		5.3943	3.6653	5.6436
2015-08-25	19:59:00	5.7327	5.2529	5.0767	4.9842			5.9832		5.2058	3.6653	5.6436
2015-08-25	21:59:00	4.4154	4.3103	3.822	3.4785			4.4755		4.0744	3.6653	5.6436
2015-08-25	23:59:00	3.5371	3.4931	2.9435	2.4744			3.2187		3.0684	3.6653	5.6436
2015-08-26	01:59:00	3.0351	3.1788	2.6298	2.1606			2.653		2.6911	3.7281	5.5807
2015-08-26	03:59:00	2.6586	2.9901	2.316	1.8468			2.2129		2.3137	3.6653	5.4551
2015-08-26	05:59:00	2.3449	2.8644	2.1277	1.5958			1.8986		2.0621	3.6653	5.3294
2015-08-26	07:59:00	2.3449	2.8644	2.1905	1.7841			2.2129		2.125	3.6025	5.2037
2015-08-26	09:59:00	2.9096	3.1159	2.4415	2.0351			6.1089		2.4395	3.5398	5.078
2015-08-26	11:59:00	5.9208	3.4302	3.0063	2.6			11.3184		3.0684	3.477	5.0152
2015-08-26	13:59:00	10.2465	3.8074	3.6965	3.2275			14.9548		3.8229	3.477	5.0152
2015-08-26	15:59:00	11.1864	4.3103	4.6376	3.9804			15.644		4.8915	3.4143	5.2037
2015-08-26	17:59:00	13.0031	6.2582	6.3938	4.9842			13.8266		7.2162	3.3515	5.5179
2015-08-26	19:59:00	11.9382	8.7701	8.2748	7.1793			11.3811		8.8489	3.3515	5.832
2015-08-26	21:59:00	9.6824	7.7656	7.0836	5.7369			9.6872		7.5303	3.4143	6.0833
2015-08-26	23:59:00	8.2408	6.7607	6.1429	4.796			8.3693		6.7137	3.477	6.2718
2015-08-27	01:59:00	7.1123	6.0697	5.453	4.2941			7.4276		6.1483	3.5398	6.3346
2015-08-27	03:59:00	6.2971	5.5671	4.8258	3.7922			6.6113		5.7713	3.6025	6.3346
2015-08-27	05:59:00	5.6072	5.1901	4.3866	3.4785			6.1089		5.3314	3.6653	6.3346
2015-08-27	07:59:00	5.2936	4.9388	4.0729	3.353			6.2345		5.0172	3.7281	6.2718
2015-08-27	09:59:00	5.6072	4.9388	4.1357	3.4785			8.8714		5.0172	3.7908	6.209
2015-08-27	11:59:00	8.3035	5.0016	4.3866	3.7295			12.7608		5.2686	3.7908	6.1462
2015-08-27	13:59:00	12.2514	5.3158	5.1394	4.4823			16.1453		6.1483	3.7908	6.209
2015-08-27	15:59:00	13.0657	5.8813	6.3311	5.4233			17.5859		7.2162	3.7908	6.3346
2015-08-27	17:59:00	14.5687	7.5144	7.9614	6.6149			16.2079		9.2256	3.7908	6.6487
2015-08-27	19:59:00	12.6272	8.3307	8.5256	7.242			13.7012		9.4139	3.8536	6.9628
2015-08-27	21:59:00	10.6224	7.64	7.5225	6.0505			11.632		8.3466	3.8536	7.1512
2015-08-27	23:59:00	9.3691	7.012	6.8955	5.4233			10.3774		7.7815	3.9163	7.3396
2015-08-28	01:59:00	8.6796	6.8863	6.8328	5.486			9.5617		7.4675	4.0418	7.4024
2015-08-28	03:59:00	8.0527	6.8863	6.8328	5.5487			8.9342		7.2162	4.1046	7.4652
2015-08-28	05:59:00	7.4258	6.6979	6.5819	5.3606			8.3693		6.8394	4.1673	7.4024
2015-08-28	07:59:00	6.9242	6.3838	6.1429	4.9215			8.2437		6.5253	4.2301	7.4024
2015-08-28	09:59:00	7.3631	6.5723	6.3938	5.3606			11.2557		6.8394	4.2301	7.3396
2015-08-28	11:59:00	9.8704	6.8235	6.8955	5.9251			15.7693		7.2162	4.2929	7.2768
2015-08-28	13:59:00	13.3162	7.0748	7.3344	6.4268			19.2138		7.7187	4.2929	7.2768
2015-08-28	15:59:00	14.193	7.5772	8.2121	7.4301			20.3404		8.7861	4.3556	7.4024
2015-08-28	17:59:00	16.0713	9.084	9.4032	7.8063			18.9634		10.4809	4.3556	7.6536
2015-08-28	19:59:00	14.9444	11.1549	10.7819	9.4989			16.2079		11.7357	4.4184	7.9048
2015-08-28	21:59:00	12.7525	10.0255	9.5285	8.0571			14.2027		10.4181	4.4811	8.1559
2015-08-28	23:59:00	11.1864	9.084	8.5883	7.1166			12.6354		9.4767	4.6066	8.2815
2015-08-29	01:59:00	9.9958	8.3935	7.8987	6.6149			11.3811		8.8489	4.6693	8.3443
2015-08-29	03:59:00	9.181	7.8911	7.3971	6.3014			10.5029		8.4722	4.7948	8.3443
2015-08-29	05:59:00	8.6169	7.5772	7.0209	5.9878			9.8755		8.0955	4.8576	8.2815
2015-08-29	07:59:00	8.1781	7.4516	6.8955	5.9251			9.75		7.8443	4.9203	8.2187
2015-08-29	09:59:00	8.3035	7.3888	6.8955	5.9878			13.3251		7.7815	4.9831	8.1559
2015-08-29	11:59:00	11.1237	7.5144	7.1463	6.3641			17.899		8.0955	4.9831	8.0931
2015-08-29	13:59:00	15.1948	7.7028	7.6479	6.9285			20.9662		8.535	4.9831	8.0931
2015-08-29	15:59:00	15.9461	8.0167	8.5256	7.7436			21.4667		9.4767	5.0458	8.2815
2015-08-29	17:59:00	17.8864	9.6489	10.0299	8.5586			19.5894		11.5475	5.0458	8.5326
2015-08-29	19:59:00	16.3217	11.9704	11.6591	10.5017			16.7717		12.9274	5.0458	8.8465
2015-08-29	21:59:00	13.7546	10.904	10.4686	8.9348			14.7041		11.673	5.1086	9.0976
2015-08-29	23:59:00	12.314	9.9627	9.6539	8.1198			13.5132		10.9201	5.234	9.2232
2015-08-30	01:59:00	11.3743	9.3979	9.0898	7.5555			12.6354		10.3554	5.2968	9.286
2015-08-30	03:59:00	10.5598	8.9585	8.651	7.1166			11.8202		9.8533	5.4223	9.286
2015-08-30	05:59:00	9.8078	8.519	8.1494	6.5522			10.942		9.2884	5.485	9.286
2015-08-30	07:59:00	9.2437	8.2679	7.9614	6.4268			10.6911		8.8489	5.5477	9.2232
2015-08-30	09:59:00	9.181	8.0795	7.6479	6.0505			14.0773		8.6606	5.5477	9.0976
2015-08-30	11:59:00	11.8755	8.0167	7.6479	6.1759			18.6504		8.6606	5.6105	9.0349
2015-08-30	13:59:00	15.7583	8.0795	7.9614	6.6149			21.4042		9.0373	5.6105	9.0349
2015-08-30	15:59:00	16.3843	8.3307	8.7137	7.3047			21.9672		9.8533	5.6105	9.1604
2015-08-30	17:59:00	18.0115	9.7117	10.0299	8.1825			19.9649		11.673	5.6105	9.4115
2015-08-30	19:59:00	16.3843	11.7195	11.4085	9.8123			17.1475		12.802	5.6732	9.6625
2015-08-30	21:59:00	13.8172	10.7157	10.0926	8.2452			14.8921		11.422	5.6732	9.8508
2015-08-30	23:59:00	12.1888	9.7117	9.2151	7.4928			13.3878		10.5436	5.7359	9.9763
2015-08-31	01:59:00	10.9984	9.084	8.5256	6.9285			12.2592		9.916	5.7987	10.0391
2015-08-31	03:59:00	9.9958	8.4562	7.836	6.3641			11.3811		9.2884	5.8614	9.9763
2015-08-31	05:59:00	9.1184	7.9539	7.209	5.6742			10.5029		8.6606	5.8614	9.9136
2015-08-31	07:59:00	8.4915	7.64	6.77	5.4233			10.1892		8.1583	5.9241	9.7881
2015-08-31	09:59:00	8.4915	7.5144	6.5819	5.2978			13.4505		7.9699	5.9241	9.6625
2015-08-31	11:59:00	11.249	7.5144	6.77	5.6115			17.5859		8.0955	5.9241	9.537
2015-08-31	13:59:00	15.1322	7.7028	7.209	6.2387			20.2153		8.535	5.8614	9.4743
2015-08-31	15:59:00	15.5079	8.0795	8.0868	7.1166			20.1527		9.4139	5.8614	9.5998
2015-08-31	17:59:00	15.8835	9.1468	9.2778	8.1198			18.3373		10.7319	5.8614	9.7881
2015-08-31	19:59:00	14.0677	9.2723	9.2151	7.9944			16.1453		10.4809	5.7987	9.9763
2015-08-31	21:59:00	12.1888	8.5818	8.3375	6.8658			14.2027		9.4767	5.7987	10.1019
2015-08-31	23:59:00	10.8731	8.0795	7.6479	6.2387			12.7608		8.7861	5.8614	10.1646
2015-09-01	01:59:00	9.9958	7.7028	7.1463	5.8623			11.8202		8.2838	5.8614	10.1646
2015-09-01	03:59:00	9.3691	7.4516	6.8328	5.7369			11.0048		7.9699	5.9241	10.1019
2015-09-01	05:59:00	8.805	7.2004	6.5192	5.5487			10.252		7.6559	5.8614	10.0391
2015-09-01	07:59:00	8.5542	7.1376	6.4565	5.6742			9.8755		7.5931	5.8614	9.9136
2015-09-01	09:59:00	8.3662	6.9491	6.1429	5.2351			12.3219		7.279	5.8614	9.7881
2015-09-01	11:59:00	10.8104	7.012	6.3938	5.486			16.1453		7.4675	5.8614	9.6625
2015-09-01	13:59:00	13.8799	7.3888	7.1463	6.4268			18.8382		8.2211	5.7987	9.5998
2015-09-01	15:59:00	13.692	8.1423	8.2748	7.7436			17.4606		9.2256	5.7987	9.6625
2015-09-01	17:59:00	12.502	8.519	8.651	8.1198			14.7668		9.2256	5.7359	9.8508
2015-09-01	19:59:00	10.1211	7.3888	6.9582	6.2387			12.0083		7.6559	5.7359	9.9136
2015-09-01	21:59:00	8.6796	6.5095	5.8921	5.486			10.001		6.6509	5.7359	9.9763
2015-09-01	23:59:00	7.8646	5.9441	5.3276	4.9842			8.9969		6.0227	5.7359	9.9136
2015-09-02	01:59:00	7.3631	5.5671	4.8885	4.6705			8.432		5.6456	5.7359	9.7881
2015-09-02	03:59:00	7.1123	5.4415	4.8258	4.6078			8.1182		5.5828	5.6732	9.5998
2015-09-02	05:59:00	6.8615	5.4415	4.763	4.5451			7.5532		5.3314	5.6732	9.4115
2015-09-02	07:59:00	6.4852	5.4415	4.763	4.5451			6.9881		5.2686	5.6105	9.2232
2015-09-02	09:59:00	6.4852	5.6299	5.0139	4.9842			6.7997		5.6456	5.5477	9.0349
2015-09-02	11:59:00	7.3004	6.3838	6.0175	6.3641			7.4904		6.6509	5.485	8.9093
2015-09-02	13:59:00	6.3598	6.1326	5.453	5.2351			6.6113		5.7713	5.4223	8.721
2015-09-02	15:59:00	6.6733	6.2582	5.7666	5.8623			7.2392		6.0855	5.3595	8.5954
2015-09-02	17:59:00	7.1123	6.4467	6.2056	6.3014			7.7415		6.5881	5.3595	8.4699
2015-09-02	19:59:00	6.8615	6.0069	5.5785	5.6742			7.302		6.1483	5.2968	8.3443
2015-09-02	21:59:00	6.2344	5.3786	4.8258	4.8587			6.6113		5.4571	5.2968	8.2815
2015-09-02	23:59:00	5.6072	5.0644	4.3239	4.3569			6.0461		5.0172	5.2968	8.1559
2015-09-03	01:59:00	5.3563	5.0016	4.2612	4.2941			5.6064		4.8287	5.234	8.0304
2015-09-03	03:59:00	5.0427	4.8759	4.0102	3.9804			5.1666		4.5144	5.234	7.9048
2015-09-03	05:59:00	4.7918	4.6874	3.822	3.7922			4.7897		4.263	5.1713	7.7792
2015-09-03	07:59:00	4.6664	4.4988	3.6338	3.604			4.6012		4.0744	5.1086	7.6536
2015-09-03	09:59:00	5.1682	4.7502	4.0102	4.1059			5.6692		4.5144	5.0458	7.528
2015-09-03	11:59:00	5.7327	5.1273	4.6376	4.9215			6.2345		5.0801	5.0458	7.4652
2015-09-03	13:59:00	6.6733	6.0069	5.7666	6.1132			7.1764		6.0227	4.9203	7.3396
2015-09-03	15:59:00	6.9242	6.3838	6.2056	6.2387			7.1764		6.1483	4.9203	7.2768
2015-09-03	17:59:00	5.0427	5.0644	4.3239	4.0432			5.4179		4.703	4.8576	7.2768
2015-09-03	19:59:00	2.9724	3.6188	2.6298	2.0979			3.2187		2.5653	4.8576	7.214
2015-09-03	21:59:00	2.3449	3.3674	2.4415	1.7213			2.5901		1.9363	4.8576	7.0884
2015-09-03	23:59:00	2.0938	3.1788	2.1277	1.533			2.4015		1.7476	4.7948	6.9
2015-09-04	01:59:00	1.9683	3.053	1.9394	1.4702			2.4015		1.7476	4.7321	6.7115
2015-09-04	03:59:00	1.8428	2.9901	1.7511	1.533			2.4644		1.6847	4.6693	6.5231
2015-09-04	05:59:00	1.78	2.8644	1.6256	1.533			2.5273		1.5589	4.6066	6.3975
2015-09-04	07:59:00	1.78	2.8015	1.5001	1.5958			2.5273		1.5589	4.4811	6.209
2015-09-04	09:59:00	1.6545	2.8015	1.7511	1.6585			2.7158		1.9363	4.4184	6.0833
2015-09-04	11:59:00	1.529	2.6758	1.7511	1.533			2.7158		2.6911	4.2929	5.9577
2015-09-04	13:59:00	2.2193	2.7386	3.0063	2.9137			4.4127		3.8229	4.2301	5.8949
2015-09-04	15:59:00	3.7253	3.7446	4.2612	3.6667			5.4179		4.3258	4.1673	5.7692
2015-09-04	17:59:00	4.7918	4.6245	4.4494	3.7295			5.9832		4.6401	4.0418	5.7692
2015-09-04	19:59:00	3.5998	3.7446	3.2573	2.6			4.6012		3.5085	3.9791	5.7064
2015-09-04	21:59:00	3.0351	3.3045	2.6298	2.2234			3.8472		2.9426	3.9791	5.7064
2015-09-04	23:59:00	2.9096	3.053	2.316	2.0351			3.4701		2.6911	3.9791	5.7064
2015-09-05	01:59:00	2.6586	2.8644	2.065	1.9096			3.1558		2.4395	3.9163	5.6436
2015-09-05	03:59:00	1.9683	2.4242	1.5629	1.2819			2.3387		1.8734	3.8536	5.5807
2015-09-05	05:59:00	1.5917	2.1727	1.3118	1.0308			1.8357		1.5589	3.7908	5.5179
2015-09-05	07:59:00	1.4662	1.984	1.1862	0.9681			1.6471		1.4331	3.7281	5.3922
2015-09-05	09:59:00	1.3407	1.984	1.1235	0.9053			1.4584		1.496	3.7281	5.3294
2015-09-05	11:59:00	1.2779	2.1727	1.249	0.9681			1.3956		1.8734	3.6025	5.2037
2015-09-05	13:59:00	1.2151	1.984	1.1235	0.9053			1.3956		1.8734	3.5398	5.078
2015-09-05	15:59:00	1.2151	1.6067	0.9352	0.8425			1.4584		1.2443	3.477	5.0152
2015-09-05	17:59:00	1.2151	1.2922	0.6841	0.7169			1.4584		0.8039	3.4143	4.8895
2015-09-05	19:59:00	1.2151	1.0405	0.4957	0.7169			1.4584		0.5522	3.3515	4.8267
2015-09-05	21:59:00	1.1524	0.8518	0.2446	0.6542			1.3956		0.3634	3.2887	4.701
2015-09-05	23:59:00	1.1524	0.6631	-0.0693	0.5914			1.3956		0.1117	3.226	4.6381
2015-09-06	01:59:00	1.2151	0.4743	-0.446	0.5286			1.3327		-0.0771	3.1632	4.5753
2015-09-06	03:59:00	1.2151	0.2227	-0.76	0.4658			1.2698		-0.3289	3.1004	4.4496
2015-09-06	05:59:00	1.1524	0.0339	-0.9484	0.403			1.144		-0.5177	2.9749	4.3867
2015-09-06	07:59:00	1.2151	-0.092	-1.0112	0.3403			1.0182		-0.7066	2.9121	4.3239
2015-09-06	09:59:00	1.2151	-0.1549	-1.0112	0.3403			0.9554		-0.7066	2.8494	4.261
2015-09-06	11:59:00	1.2151	-0.029	-0.76	0.4658			1.0811		-0.3289	2.7866	4.261
2015-09-06	13:59:00	1.1524	0.1597	-0.446	0.5914			1.2698		-0.0142	2.7238	4.1982
2015-09-06	15:59:00	1.0896	0.2227	-0.1949	0.7169			1.3956		0.1117	2.5983	4.1353
2015-09-06	17:59:00	1.0268	0.3485	-0.0693	0.7797			1.5213		0.2375	2.5355	4.1353
2015-09-06	19:59:00	1.0268	0.3485	-0.1949	0.7169			1.0811		0.1117	2.5355	4.0725
2015-09-06	21:59:00	1.0268	0.2227	-0.5088	0.5914			0.7038		-0.203	2.4727	4.0096
2015-09-06	23:59:00	1.0268	0.0968	-0.6972	0.4658			0.3264		-0.4548	2.41	4.0096
2015-09-07	01:59:00	1.0268	-0.029	-0.76	0.403			0.0119		-0.6436	2.3472	3.9468
2015-09-07	03:59:00	1.0896	-0.1549	-0.8856	0.403			-0.2397		-0.7695	2.2844	3.8839
2015-09-07	05:59:00	1.0896	-0.2178	-0.9484	0.3403			-0.5542		-0.9584	2.2216	3.8839
2015-09-07	07:59:00	1.1524	-0.3437	-1.074	0.2775			-0.6801		-1.1472	2.2216	3.821
2015-09-07	09:59:00	1.1524	-0.4066	-1.074	0.2147			-0.3026		-1.1472	2.1589	3.821
2015-09-07	11:59:00	1.1524	-0.3437	-1.0112	0.2147			1.3327		-1.0213	2.0961	3.7582
2015-09-07	13:59:00	1.0268	-0.092	-0.6972	0.2775			4.9782		-0.4548	2.0961	3.6953
2015-09-07	15:59:00	0.964	0.0968	-0.1949	0.403			6.2973		0.1117	2.0333	3.6953
2015-09-07	17:59:00	0.9013	0.2227	-0.0065	0.5286			5.1666		0.3005	1.9705	3.6324
2015-09-07	19:59:00	0.9013	0.2856	-0.0693	0.4658			3.5329		0.1117	1.9705	3.6324
2015-09-07	21:59:00	0.964	0.3485	-0.1949	0.4658			2.3387		-0.0771	1.9077	3.5696
2015-09-07	23:59:00	0.964	0.3485	-0.2577	0.403			1.5842		-0.203	1.9077	3.5696
2015-09-08	01:59:00	0.964	0.2856	-0.3205	0.403			1.144		-0.2659	1.845	3.5067
2015-09-08	03:59:00	0.9013	0.3485	-0.3832	0.3403			0.8296		-0.5807	1.845	3.5067
2015-09-08	05:59:00	0.5874	0.2856	-0.5716	0.2147			0.2006		-0.8954	1.7822	3.4439
2015-09-08	07:59:00	0.3991	0.2227	-0.76	0.0891			-0.3026		-1.1472	1.7822	3.4439
2015-09-08	09:59:00	0.2735	0.1597	-0.76	-0.0364			2.5901		-1.2102	1.7822	3.381
2015-09-08	11:59:00	0.7757	0.1597	-0.76	-0.0992			7.5532		-0.9584	1.7194	3.3181
2015-09-08	13:59:00	0.9013	0.2227	-0.5088	0.0891			9.6245		-0.3918	1.7194	3.3181
2015-09-08	15:59:00	1.4034	0.3485	-0.1949	0.1519			10.8793		-0.0142	1.6566	3.3181
2015-09-08	17:59:00	3.5371	0.4114	-0.0065	0.1519			9.6872		0.3005	1.6566	3.381
2015-09-08	19:59:00	2.6586	0.5372	0.119	0.2147			6.8625		0.5522	1.6566	3.4439
2015-09-08	21:59:00	1.2779	0.6002	0.0563	0.2147			4.6012		0.2375	1.5938	3.5067
2015-09-08	23:59:00	0.5246	0.5372	0.0563	0.2147			2.9673		-0.0771	1.5938	3.5696
2015-09-09	01:59:00	-0.0404	0.4114	-0.1321	0.0891			1.8986		-0.4548	1.5938	3.5696
2015-09-09	03:59:00	-0.5427	0.2856	-0.2577	-0.0364			1.0811		-0.7066	1.5938	3.5696
2015-09-09	05:59:00	-0.7938	0.2227	-0.3832	-0.0364			0.5151		-0.8325	1.531	3.5067
2015-09-09	07:59:00	-1.1078	0.0968	-0.5088	-0.0992			0.2006		-1.0213	1.531	3.4439
2015-09-09	09:59:00	-0.5427	0.0968	-0.446	-0.0364			1.8357		-0.7066	1.531	3.381
2015-09-09	11:59:00	0.3363	0.2227	-0.1321	0.1519			2.8416		-0.0142	1.531	3.3181
2015-09-09	13:59:00	2.7214		0.0563	0.2147			5.3551		0.8039	1.4683	3.2552
2015-09-09	15:59:00	4.5409		0.1818	0.2775			7.4276		1.3702	1.4683	3.2552
2015-09-09	17:59:00	5.1682		0.1818	0.403			7.0509		1.6218	1.4683	3.2552
2015-09-09	19:59:00	3.7881		0.1818	0.403			5.3551		0.8668	1.4683	3.3181
2015-09-09	21:59:00	2.4076		0.119	0.3403			3.6586		0.3005	1.4683	3.381
2015-09-09	23:59:00	1.4662		-0.0065	0.2775			2.5901		-0.0142	1.4055	3.4439
2015-09-10	01:59:00	0.713		-0.1321	0.1519			1.6471		-0.3289	1.4055	3.381
2015-09-10	03:59:00	0.5246		-0.2577	0.1519			1.2698		-0.3289	1.4055	3.381
2015-09-10	05:59:00	0.2107		-0.3832	0.0263			0.8925		-0.5177	1.4055	3.3181
2015-09-10	07:59:00	0.2107		-0.3832	0.0263			0.7038		-0.5177	1.4055	3.2552
2015-09-10	09:59:00	0.4618		-0.3205	0.0891			1.2698		-0.2659	1.4055	3.1924
2015-09-10	11:59:00	2.0938		-0.0693	0.2147			4.5384		0.2375	1.3427	3.1295
2015-09-10	13:59:00	5.3563		0.0563	0.2147			8.9342		0.5522	1.3427	3.1295
2015-09-10	15:59:00	5.9835		0.1818	0.3403			9.3735		1.1185	1.3427	3.1924
2015-09-10	17:59:00	6.5479		0.1818	0.5286			8.432		1.6847	1.3427	3.3181
2015-09-10	19:59:00	5.0427		0.1818	0.4658			6.3601		1.1185	1.3427	3.4439
2015-09-10	21:59:00	3.4744		0.119	0.3403			4.5384		0.4893	1.3427	3.5696
2015-09-10	23:59:00	1.9683		-0.0065	0.2147			2.7787		-0.1401	1.2799	3.6324
2015-09-11	01:59:00	1.1524		-0.1949	0.0263			1.8357		-0.4548	1.2799	3.6324
2015-09-11	03:59:00	0.6502		-0.3832	-0.162			1.2069		-0.6436	1.2799	3.5696
2015-09-11	05:59:00	0.3363		-0.5088	-0.2876			0.8925		-0.7695	1.2799	3.4439
2015-09-11	07:59:00	0.2107		-0.5088	-0.2876			0.7038		-0.6436	1.2799	3.381
2015-09-11	09:59:00	0.3991		-0.446	-0.0992			0.8296		-0.3289	1.2799	3.3181
2015-09-11	11:59:00	2.0938		-0.2577	-0.0364			4.9154		-0.2659	1.2799	3.1924
2015-09-11	13:59:00	5.1054		-0.1321	0.0891			8.6831		0.0487	1.2799	3.1295
2015-09-11	15:59:00	4.8545		0.0563	0.1519			7.6159		0.4263	1.2171	3.2552
2015-09-11	17:59:00	5.0427		0.119	0.2147			6.4229		0.678	1.2171	3.381
2015-09-11	19:59:00	3.9763		0.1818	0.2147			4.664		0.6151	1.2171	3.4439
2015-09-11	21:59:00	2.9096		0.119	0.2147			3.4701		0.3634	1.2171	3.5067
2015-09-11	23:59:00	1.7173		0.119	0.1519			2.3387		0.2375	1.2171	3.5696
2015-09-12	01:59:00	1.2151		0.119	0.1519			1.7728		0.1117	1.1543	3.5067
2015-09-12	03:59:00	1.3407		0.119	0.1519			1.7728		0.2375	1.1543	3.4439
2015-09-12	05:59:00	1.1524		0.119	0.1519			1.5213		0.1746	1.1543	3.381
2015-09-12	07:59:00	0.9013		0.119	0.1519			1.5213		0.1117	1.1543	3.3181
2015-09-12	09:59:00	1.0896		0.119	0.1519			4.8525		0.1746	1.1543	3.2552
2015-09-12	11:59:00	3.7881		0.1818	0.1519			9.1852		0.3005	1.1543	3.1924
2015-09-12	13:59:00	7.6139		0.1818	0.2147			12.071		0.741	1.1543	3.2552
2015-09-12	15:59:00	8.2408		0.1818	0.2147			12.6354		1.3702	1.1543	3.4439
2015-09-12	17:59:00	9.9958		0.2446	0.2775			11.2557		2.6282	1.1543	3.6953
2015-09-12	19:59:00	8.3035		0.3702	0.3403			8.5576		3.257	1.1543	4.0096
2015-09-12	21:59:00	6.1089		0.2446	0.403			6.6113		2.4395	1.1543	4.1982
2015-09-12	23:59:00	4.9173		0.2446	0.403			5.4807		2.0621	1.1543	4.3239
2015-09-13	01:59:00	4.039		0.2446	0.3403			4.6012		1.7476	1.1543	4.3867
2015-09-13	03:59:00	3.5371		0.3074	0.3403			4.2242		1.8105	1.1543	4.3867
2015-09-13	05:59:00	3.2234		0.3074	0.3403			3.91		1.7476	1.1543	4.3239
2015-09-13	07:59:00	3.0979		0.3074	0.403			4.0357		1.7476	1.1543	4.261
2015-09-13	09:59:00	3.5371		0.4957	0.4658			7.0509		1.9363	1.1543	4.261
2015-09-13	11:59:00	5.7954		1.1235	0.5914			10.252		2.6282	1.1543	4.1982
2015-09-13	13:59:00	8.0527		2.065	0.7169			11.5066		3.5085	1.0915	4.1982
2015-09-13	15:59:00	7.4258		2.567	1.2819			9.5617		3.9486	1.1543	4.3867
2015-09-13	17:59:00	6.736		2.6925	1.7213			8.3693		3.9486	1.1543	4.5753
2015-09-13	19:59:00	6.0462		2.6925	1.9724			7.2392		3.9486	1.1543	4.701
2015-09-13	21:59:00	4.7918		1.8767	1.3447			5.7948		2.9426	1.2171	4.7638
2015-09-13	23:59:00	4.1018		1.3745	0.9681			4.9782		2.6282	1.2171	4.8267
2015-09-14	01:59:00	3.9763		1.4373	1.1564			4.7897		2.6911	1.2799	4.8267
2015-09-14	03:59:00	3.5998		1.4373	1.2191			4.3499		2.5024	1.2799	4.7638
2015-09-14	05:59:00	3.5998		1.6256	1.4702			4.2242		2.5653	1.3427	4.701
2015-09-14	07:59:00	3.4744		1.6884	1.5958			3.91		2.5024	1.3427	4.6381
2015-09-14	09:59:00	3.5998		1.8767	1.8468			4.0357		2.6282	1.3427	4.5753
2015-09-14	11:59:00	2.0938		1.0607	0.8425			2.4644		1.4331	1.4055	4.5124
2015-09-14	13:59:00	1.6545		0.8096	0.6542			2.1501		1.6847	1.4055	4.4496
2015-09-14	15:59:00	1.8428		1.0607	0.6542			2.5273		1.8105	1.4055	4.3239
2015-09-14	17:59:00	2.2821		1.249	0.9053			2.653		1.8734	1.4055	4.261
2015-09-14	19:59:00	2.5959		1.5001	1.2191			2.2129		2.1879	1.4055	4.1353
2015-09-14	21:59:00	2.2193		1.1862	0.9681			2.1501		1.8105	1.4055	4.0725
2015-09-14	23:59:00	2.0311		1.1235	0.9681			2.0872		1.7476	1.4055	4.0096
2015-09-15	01:59:00	1.9683		1.0607	0.9681			2.0243		1.6847	1.4055	3.8839
2015-09-15	03:59:00	1.78		0.9352	0.8425			1.7728		1.496	1.4055	3.821
2015-09-15	05:59:00	1.8428		0.9979	0.9681			1.8986		1.496	1.4055	3.7582
2015-09-15	07:59:00	1.529		0.8096	0.6542			1.7099		1.2443	1.4055	3.6953
2015-09-15	09:59:00	1.6545		0.9352	0.8425			3.6586		1.3702	1.4055	3.6324
2015-09-15	11:59:00	3.5371		1.8767	1.9096			6.2345		2.2508	1.3427	3.6324
2015-09-15	13:59:00	4.98		3.0063	3.1647			6.7997		3.3828	1.3427	3.6324
2015-09-15	15:59:00	5.9208		4.1357	4.1687			7.4904		4.4515	1.3427	3.6953
2015-09-15	17:59:00	5.4818		4.1357	3.9177			6.1717		4.263	1.4055	3.821
2015-09-15	19:59:00	4.4782		3.4455	3.102			4.7269		3.5085	1.4055	3.9468
2015-09-15	21:59:00	3.5998		2.6925	2.3489			3.5958		2.9426	1.4683	4.0725
2015-09-15	23:59:00	2.9096		2.065	1.6585			2.9673		2.3137	1.531	4.0725
2015-09-16	01:59:00	2.5331		1.6256	1.2819			2.653		1.9992	1.5938	4.0725
2015-09-16	03:59:00	2.5959		1.5001	1.2819			2.7158		2.0621	1.6566	4.0096
2015-09-16	05:59:00	2.5959		1.5001	1.2819			2.7158		2.1879	1.6566	4.0096
2015-09-16	07:59:00	2.9096		1.6884	1.6585			3.1558		2.4395	1.6566	3.9468
2015-09-16	09:59:00	2.9096		2.065	2.0979			3.1558		2.6282	1.6566	3.8839
2015-09-16	11:59:00	4.1645		2.8808	3.0392			4.9154		3.5085	1.6566	3.821
2015-09-16	13:59:00	7.0496		3.5083	3.4785			8.3065		4.0744	1.5938	3.821
2015-09-16	15:59:00	7.6139		4.3239	4.2314			8.8714		4.8287	1.6566	3.8839
2015-09-16	17:59:00	7.9273		4.5748	4.2314			8.1809		5.3943	1.6566	4.0725
2015-09-16	19:59:00	6.8615		4.4494	4.0432			6.9253		5.2058	1.7194	4.1982
2015-09-16	21:59:00	5.8581		3.9475	3.4785			6.1717		4.6401	1.7822	4.3239
2015-09-16	23:59:00	5.3563		3.6338	3.2275			5.732		4.3258	1.845	4.4496
2015-09-17	01:59:00	5.1054		3.5083	3.1647			5.5436		4.263	1.9077	4.4496
2015-09-17	03:59:00	4.7291		3.32	2.9137			5.2295		4.0115	1.9077	4.5124
2015-09-17	05:59:00	4.3527		3.0063	2.6			4.7897		3.6972	1.9705	4.5124
2015-09-17	07:59:00	4.1018		2.6925	2.2234			4.8525		3.4457	1.9705	4.5124
2015-09-17	09:59:00	4.4154		2.818	2.4744			7.3648		3.5714	2.0333	4.4496
2015-09-17	11:59:00	7.1123		3.6965	3.353			10.5656		4.3258	2.0333	4.4496
2015-09-17	13:59:00	8.9303		4.8258	4.6705			11.3184		5.3943	2.0333	4.5124
2015-09-17	15:59:00	8.7423		5.8293	5.7369			10.3147		6.3368	2.0333	4.6381
2015-09-17	17:59:00	7.3004		5.3903	4.9842			8.3065		5.52	2.0961	4.8267
2015-09-17	19:59:00	6.0462		4.5748	4.2941			6.6741		4.7658	2.1589	4.9524
2015-09-17	21:59:00	5.1054		3.9475	3.604			5.6692		4.1372	2.2216	5.078
2015-09-17	23:59:00	4.29		3.32	2.9765			4.7897		3.5714	2.2844	5.078
2015-09-18	01:59:00	3.9763		3.069	2.9137			4.4127		3.4457	2.2844	5.0152
2015-09-18	03:59:00	3.5998		2.818	2.6627			3.8472		3.1313	2.3472	5.0152
2015-09-18	05:59:00	3.2234		2.5043	2.4117			3.3444		2.8797	2.3472	4.9524
2015-09-18	07:59:00	2.6586		2.1277	1.9096			3.093		2.3766	2.3472	4.8267
2015-09-18	09:59:00	2.5331		1.8139	1.6585			5.9832		2.1879	2.3472	4.7638
2015-09-18	11:59:00	5.2936		3.0063	3.102			10.5656		3.257	2.3472	4.6381
2015-09-18	13:59:00	7.4885		4.2612	4.4823			12.1965		4.3887	2.3472	4.6381
2015-09-18	15:59:00	6.736		4.1984	4.1059			9.6872		4.0744	2.3472	4.7638
2015-09-18	17:59:00	5.7327		3.6338	3.5412			7.7415		3.6972	2.3472	4.8895
2015-09-18	19:59:00	4.9173		3.069	2.9765			6.4229		3.1941	2.3472	5.0152
2015-09-18	21:59:00	3.0351		2.065	1.6585			3.9729		2.0621	2.3472	5.0152
2015-09-18	23:59:00	2.0938		1.4373	1.1564			2.8416		1.6847	2.41	5.0152
2015-09-19	01:59:00	1.7173		1.1862	1.0308			2.4644		1.3702	2.41	4.9524
2015-09-19	03:59:00	1.4662		0.9352	0.9053			1.9614		0.9927	2.3472	4.8267
2015-09-19	05:59:00	1.3407		0.8724	0.8425			1.8986		0.9927	2.3472	4.6381
2015-09-19	07:59:00	1.2779		0.8096	0.7797			1.7099		0.9927	2.2844	4.5124
2015-09-19	09:59:00	1.4034		0.9979	0.8425			2.0243		1.496	2.2216	4.3867
2015-09-19	11:59:00	2.6586		1.8767	1.7841			3.4701		2.5653	2.2216	4.261
2015-09-19	13:59:00	4.3527		2.6925	2.6			5.2295		3.0684	2.1589	4.1982
2015-09-19	15:59:00	4.6036		2.8808	2.7882			5.3551		3.0684	2.0961	4.1353
2015-09-19	17:59:00	3.2861		2.1277	1.7213			3.7843		2.1879	2.0961	4.1982
2015-09-19	19:59:00	1.9055		1.249	0.9681			2.2129		1.3072	2.0961	4.1353
2015-09-19	21:59:00	1.4034		0.9352	0.7797			1.7099		0.9927	2.0961	4.1353
2015-09-19	23:59:00	1.2151		0.8096	0.7169			1.5213		0.8039	2.0333	4.0725
2015-09-20	01:59:00	1.1524		0.6213	0.6542			1.3956		0.678	2.0333	3.9468
2015-09-20	03:59:00	1.0896		0.4957	0.6542			1.3956		0.6151	2.0333	3.8839
2015-09-20	05:59:00	1.0896		0.4957	0.6542			1.3327		0.5522	1.9705	3.7582
2015-09-20	07:59:00	1.0268		0.4329	0.6542			1.2698		0.5522	1.9077	3.6953
2015-09-20	09:59:00	0.964		0.4329	0.6542			1.2069		0.5522	1.9077	3.6324
2015-09-20	11:59:00	0.9013		0.4957	0.5914			1.0811		0.5522	1.845	3.5067
2015-09-20	13:59:00	0.8385		0.5585	0.5914			1.0182		0.8668	1.7822	3.4439
2015-09-20	15:59:00	0.8385		0.5585	0.5286			1.3327		0.9927	1.7822	3.381
2015-09-20	17:59:00	0.7757		0.5585	0.5286			1.3327		0.8039	1.7194	3.381
2015-09-20	19:59:00	0.8385		0.4957	0.5286			1.0811		0.6151	1.7194	3.3181
2015-09-20	21:59:00	0.8385		0.4329	0.5286			0.8296		0.3634	1.6566	3.2552
2015-09-20	23:59:00	0.9013		0.3074	0.5286			0.6409		0.1746	1.5938	3.2552
2015-09-21	01:59:00	0.9013		0.2446	0.4658			0.5151		0.1117	1.5938	3.1295
2015-09-21	03:59:00	0.7757		0.0563	0.403			0.0748		-0.1401	1.5938	3.0666
2015-09-21	05:59:00	0.5874		-0.1321	0.3403			-0.4284		-0.3289	1.531	3.0038
2015-09-21	07:59:00	0.3991		-0.446	0.2147			-0.5542		-0.5177	1.531	2.9409
2015-09-21	09:59:00	0.2735		-0.6344	0.2147			1.0811		-0.5177	1.4683	2.8151
2015-09-21	11:59:00	0.6502		-0.446	0.2147			6.7997		-0.3289	1.4683	2.7522
2015-09-21	13:59:00	0.8385		-0.1321	0.2775			10.7539		-0.0771	1.4055	2.7522
2015-09-21	15:59:00	3.1606		0.0563	0.2775			11.5693		0.1117	1.3427	2.9409
2015-09-21	17:59:00	5.7954		0.1818	0.3403			9.3735		0.4263	1.3427	3.1924
2015-09-21	19:59:00	4.4782		0.1818	0.403			6.4857		0.741	1.3427	3.381
2015-09-21	21:59:00	2.9096		0.1818	0.403			4.4127		0.4893	1.2799	3.5696
2015-09-21	23:59:00	1.9055		0.119	0.2775			3.0301		0.3005	1.2799	3.6324
2015-09-22	01:59:00	1.3407		-0.0065	0.2147			2.0872		0.1746	1.2171	3.6324
2015-09-22	03:59:00	0.9013		-0.0693	0.2147			1.5842		0.1117	1.2171	3.5696
2015-09-22	05:59:00	0.713		-0.1321	0.2147			1.2698		0.1117	1.2171	3.5067
2015-09-22	07:59:00	0.4618		-0.1949	0.1519			1.0811		0.0487	1.2171	3.4439
2015-09-22	09:59:00	0.9013		-0.0693	0.2147			3.6586		0.2375	1.1543	3.381
2015-09-22	11:59:00	2.4704		0.1818	0.2775			4.8525		0.8039	1.1543	3.2552
2015-09-22	13:59:00	4.4782		0.2446	0.403			6.9881		1.3072	1.1543	3.2552
2015-09-22	15:59:00	4.6036		0.3074	0.403			6.3601		1.496	1.1543	3.3181
2015-09-22	17:59:00	4.1018		0.5585	0.4658			5.1666		1.6847	1.0915	3.381
2015-09-22	19:59:00	3.3489		0.4329	0.403			3.9729		1.3702	1.0915	3.5067
2015-09-22	21:59:00	2.4704		0.3074	0.3403			2.9044		1.1185	1.0915	3.5696
2015-09-22	23:59:00	2.0938		0.3074	0.3403			2.4015		0.9927	1.0915	3.5696
2015-09-23	01:59:00	1.78		0.3074	0.3403			2.0243		0.8668	1.0915	3.5696
2015-09-23	03:59:00	1.2151		0.2446	0.3403			1.3956		0.4893	1.0915	3.5067
2015-09-23	05:59:00	1.0268		-0.2577	0.3403			1.2698		0.4893	1.0915	3.4439
2015-09-23	07:59:00	0.9013		-1.1368	0.3403			1.0811		0.3634	1.0915	3.381
2015-09-23	09:59:00	0.8385		-1.7648	0.2147			0.7667		0.2375	1.0287	3.2552
2015-09-23	11:59:00	0.7757		-1.702	0.1519			0.6409		0.0487	1.0287	3.1924
2015-09-23	13:59:00	0.7757		-1.2624	0.1519			0.6409		0.0487	1.0287	3.1295
2015-09-23	15:59:00	0.7757		-0.6972	0.2147			0.7667		0.0487	1.0287	3.0666
2015-09-23	17:59:00	0.713		-0.5088	0.2147			0.8296		0.1117	1.0287	3.0038
2015-09-23	19:59:00	0.713		-0.8856	0.2147			0.7667		0.0487	1.0287	2.9409
2015-09-23	21:59:00	0.713		-1.1368	0.1519			0.7667		-0.0142	0.9659	2.878
2015-09-23	23:59:00	0.713		-1.1996	0.1519			0.7038		-0.1401	0.9659	2.8151
2015-09-24	01:59:00	0.713		-1.1996	0.1519			0.7667		-0.203	0.9659	2.7522
2015-09-24	03:59:00	0.6502		-1.1368	0.1519			0.7667		-0.3289	0.9659	2.6894
2015-09-24	05:59:00	0.6502		-1.1368	0.0891			0.7667		-0.3918	0.9031	2.6894
2015-09-24	07:59:00	0.6502		-1.1368	0.0891			0.7667		-0.4548	0.9031	2.6265
2015-09-24	09:59:00	0.6502		-0.9484	0.0891			0.7667		-0.4548	0.9031	2.6265
2015-09-24	11:59:00	0.6502		-0.5088	0.1519			0.7667		-0.3918	0.9031	2.5636
2015-09-24	13:59:00	0.6502		-0.0693	0.2147			0.7038		-0.1401	0.9031	2.5636
2015-09-24	15:59:00	0.5874		0.1818	0.2147			0.8925		0.0487	0.8404	2.5007
2015-09-24	17:59:00	0.5874		0.4329	0.2147			0.9554		0.1746	0.8404	2.5007
2015-09-24	19:59:00	0.5874		0.2446	0.2147			0.8296		0.1746	0.8404	2.4378
2015-09-24	21:59:00	0.5874		0.1818	0.2775			0.7667		0.1746	0.8404	2.4378
2015-09-24	23:59:00	0.5874		-0.0065	0.2775			0.7038		0.2375	0.8404	2.4378
2015-09-25	01:59:00	0.6502		-0.1321	0.2147			0.578		0.1746	0.8404	2.375
2015-09-25	03:59:00	0.6502		-0.3205	0.2147			0.5151		0.1746	0.8404	2.375
2015-09-25	05:59:00	0.5874		-0.5088	0.1519			0.4522		0.1746	0.7776	2.375
2015-09-25	07:59:00	0.5874		-0.5088	0.1519			0.4522		0.1117	0.8404	2.3121
2015-09-25	09:59:00	0.6502		-0.0693	0.1519			0.8296		0.1746	0.7776	2.3121
2015-09-25	11:59:00	0.6502		0.119	0.1519			4.4755		0.1746	0.7776	2.3121
2015-09-25	13:59:00	0.6502		0.3074	0.2147			9.499		0.2375	0.7776	2.3121
2015-09-25	15:59:00	1.1524		1.1235	0.2147			10.6284		0.3005	0.7776	2.375
2015-09-25	17:59:00	2.0311		1.7511	0.2147			8.9342		0.4263	0.7776	2.5636
2015-09-25	19:59:00	1.4662		0.8724	0.2147			6.2973		0.5522	0.7776	2.7522
2015-09-25	21:59:00	0.964		0.2446	0.2147			4.4127		0.5522	0.7776	2.9409
2015-09-25	23:59:00	0.6502		0.1818	0.2775			3.2815		0.5522	0.7776	3.0666
2015-09-26	01:59:00	0.6502		0.119	0.2775			2.5901		0.5522	0.7776	3.0666
2015-09-26	03:59:00	0.5874		0.119	0.2775			1.9614		0.4893	0.7776	3.0666
2015-09-26	05:59:00	0.148		-0.3205	0.2775			1.2698		0.3634	0.7776	3.0666
2015-09-26	07:59:00	-0.4799		-0.76	0.2147			0.7667		0.2375	0.7776	3.0038
2015-09-26	09:59:00	-0.5427		-0.6972	0.2147			4.3499		0.0487	0.7776	2.9409
2015-09-26	11:59:00	1.9055		-0.2577	0.1519			9.4362		0.1117	0.7776	2.878
2015-09-26	13:59:00	5.6072		0.119	0.0891			13.1997		0.1746	0.7776	2.878
2015-09-26	15:59:00	6.6106		0.4957	0.1519			13.8266		0.3005	0.7776	3.0666
2015-09-26	17:59:00	5.6699		1.1862	0.2147			10.8166		0.4263	0.7148	3.381
2015-09-26	19:59:00	4.1018		0.4957	0.2147			7.9926		0.4893	0.7148	3.6953
2015-09-26	21:59:00	2.9724		0.2446	0.2147			6.0461		0.4263	0.7148	3.8839
2015-09-26	23:59:00	2.1566		0.1818	0.2147			4.4755		0.4263	0.7148	4.0096
2015-09-27	01:59:00	1.4034		-0.0065	0.2147			3.3444		0.3005	0.7148	4.0096
2015-09-27	03:59:00	0.6502		-0.446	0.1519			2.2758		-0.0142	0.7148	4.0096
2015-09-27	05:59:00	0.2107		-0.6972	0.0891			1.6471		-0.203	0.7148	3.8839
2015-09-27	07:59:00	-0.4171		-1.1368	0.0263			1.2069		-0.3918	0.7148	3.821
2015-09-27	09:59:00	-0.4799		-1.1368	-0.0992			4.287		-0.5807	0.7148	3.6953
2015-09-27	11:59:00	1.4662		-0.446	-0.162			8.1809		-0.4548	0.7148	3.5696
2015-09-27	13:59:00	4.6036		0.1818	0.0263			10.0637		-0.203	0.7148	3.5067
2015-09-27	15:59:00	5.9835		0.5585	0.0263			11.0048		-0.0142	0.7148	3.5696
2015-09-27	17:59:00	6.7987		0.8096	0.0891			9.1852		0.1746	0.7148	3.7582
2015-09-27	19:59:00	4.4154		0.2446	0.0263			5.9204		0.1746	0.7148	3.9468
2015-09-27	21:59:00	2.3449		-0.1321	-0.0364			3.4701		-0.0771	0.7148	4.0725
2015-09-27	23:59:00	0.9013		-0.8228	-0.162			1.9614		-0.5177	0.7148	4.0725
2015-09-28	01:59:00	0.148		-1.4507	-0.3504			1.0811		-0.8325	0.7148	4.0096
2015-09-28	03:59:00	-0.5427		-1.8904	-0.6015			0.5151		-1.2102	0.7148	3.8839
2015-09-28	05:59:00	-1.045		-2.2672	-0.7899			0.1377		-1.462	0.7148	3.6953
2015-09-28	07:59:00	-1.5474		-2.5813	-0.9155			-0.2397		-1.7139	0.652	3.5696
2015-09-28	09:59:00	-1.673		-2.5185	-1.0411			2.4644		-1.9028	0.652	3.381
2015-09-28	11:59:00	0.6502		-2.1416	-1.1667			7.0509		-1.7768	0.652	3.2552
2015-09-28	13:59:00	4.5409		-1.4507	-1.1667			9.9382		-1.525	0.652	3.1924
2015-09-28	15:59:00	5.5445		-0.5716	-1.1039			9.8127		-1.2102	0.652	3.2552
2015-09-28	17:59:00	4.039		-0.0065	-0.8527			6.3601		-1.0213	0.652	3.4439
2015-09-28	19:59:00	2.1566		-0.3832	-0.7899			3.3444		-1.0843	0.652	3.5696
2015-09-28	21:59:00	0.5874		-1.1996	-0.8527			1.2698		-1.3361	0.5892	3.6324
2015-09-28	23:59:00	-0.6683		-1.8276	-0.9783			-0.3655		-1.525	0.5892	3.6324
2015-09-29	01:59:00	-1.6102		-2.5813	-1.1039			-1.2463		-1.8398	0.5892	3.5067
2015-09-29	03:59:00	-1.9242		-3.021	-1.3551			-1.1834		-2.1547	0.5892	3.381
2015-09-29	05:59:00	-2.3011		-3.3351	-1.6063			-1.498		-2.4066	0.5892	3.2552
2015-09-29	07:59:00	-2.6151		-3.5235	-1.7947			-1.561		-2.5955	0.5892	3.0666
2015-09-29	09:59:00	-2.3011		-3.3351	-1.8575			1.2069		-2.7215	0.5892	2.878
2015-09-29	11:59:00	0.0852		-2.9582	-1.9832			5.4807		-2.7215	0.5264	2.7522
2015-09-29	13:59:00	4.1645		-2.33	-1.9832			8.4948		-2.5325	0.5264	2.6894
2015-09-29	15:59:00	5.6072		-1.7648	-1.9832			9.248		-2.2806	0.5264	2.7522
2015-09-29	17:59:00	5.4191		-1.5763	-1.9832			6.7997		-1.9658	0.5264	2.9409
2015-09-29	19:59:00	3.0351		-2.1416	-2.046			3.8472		-1.7768	0.5264	3.1295
2015-09-29	21:59:00	1.2151		-2.6441	-2.1716			2.0243		-1.9028	0.4636	3.1924
2015-09-29	23:59:00	0.2107		-2.9582	-2.1716			1.0182		-2.1547	0.4636	3.1924
2015-09-30	01:59:00	-0.4799		-3.1466	-2.2344			0.3893		-2.2806	0.4636	3.1924
2015-09-30	03:59:00	-1.1078		-3.3979	-2.2972			-0.2397		-2.4066	0.4636	3.0666
2015-09-30	05:59:00	-1.673		-3.6492	-2.4228			-0.9947		-2.5955	0.4636	2.9409
2015-09-30	07:59:00	-2.1755		-3.8377	-2.5485			-1.3093		-2.7845	0.4008	2.8151
2015-09-30	09:59:00	-2.1755		-3.7748	-2.6741			1.4584		-2.9734	0.4008	2.6894
2015-09-30	11:59:00	0.148		-3.4607	-2.7997			6.3601		-2.9104	0.4008	2.5636
2015-09-30	13:59:00	4.1645		-2.9582	-2.7997			9.4362		-2.7215	0.4008	2.5636
2015-09-30	15:59:00	5.7327	-2.1061	-2.3928	-2.7369			9.6872		-2.5325	0.4008	2.6265
2015-09-30	17:59:00	6.1717	-1.6654	-2.0788	-2.6741			7.1136		-2.0287	0.338	2.8151
2015-09-30	19:59:00	3.5371	-1.3507	-2.1416	-2.6113			4.0357		-1.9658	0.338	3.0038
2015-09-30	21:59:00	1.4034	-1.8543	-2.7069	-2.5485			1.7728		-2.3436	0.338	3.1295
2015-09-30	23:59:00	0.148	-2.358	-3.2094	-2.6113			0.3893		-2.8475	0.338	3.1295
2015-10-01	01:59:00	-0.8566	-2.6728	-3.5235	-2.6741			-0.6801		-3.0364	0.338	3.0666
2015-10-01	03:59:00	-1.9242	-3.1136	-4.0261	-2.7369			-1.8127		-3.2884	0.2752	3.0038
2015-10-01	05:59:00	-2.7408	-3.4915	-4.5288	-2.9254			-2.5679		-3.6034	0.2752	2.878
2015-10-01	07:59:00	-3.2433	-3.7435	-4.7801	-3.051			-2.8827		-3.8554	0.2752	2.6894
2015-10-01	09:59:00	-3.4318	-3.8694	-4.7801	-3.1138			-0.743		-4.3594	0.2752	2.5636
2015-10-01	11:59:00	-1.1078	-3.6805	-4.3403	-3.051			2.4644		-4.1704	0.2752	2.375
2015-10-01	13:59:00	2.5331	-3.3026	-3.5864	-3.051			5.732		-3.7294	0.2752	2.2492
2015-10-01	15:59:00	4.4154	-2.9247	-2.8953	-2.9882			6.7997		-3.2884	0.2124	2.3121
2015-10-01	17:59:00	5.2309	-2.0432	-2.4556	-2.9254			5.1038		-2.5325	0.2124	2.4378
2015-10-01	19:59:00	3.0351	-1.3507	-2.4556	-2.7997			2.7158		-2.0917	0.2124	2.5636
2015-10-01	21:59:00	1.3407	-1.7284	-2.5813	-2.7369			1.3956		-1.9028	0.2124	2.6894
2015-10-01	23:59:00	0.8385	-1.7284	-2.3928	-2.6113			1.0811		-1.6509	0.2124	2.6894
2015-10-02	01:59:00	0.4618	-1.6654	-2.2672	-2.5485			0.8925		-1.588	0.1496	2.6265
2015-10-02	03:59:00	0.2735	-1.6025	-2.1416	-2.4856			0.8296		-1.3361	0.1496	2.5636
2015-10-02	05:59:00	0.2107	-1.4766	-1.8904	-2.36			0.8296		-0.9584	0.1496	2.5636
2015-10-02	07:59:00	0.0852	-1.4766	-1.8904	-2.2972			0.8925		-0.8954	0.1496	2.5007
2015-10-02	09:59:00	0.3363	-1.2248	-1.5763	-2.1716			3.91		-0.8325	0.0868	2.4378
2015-10-02	11:59:00	2.9096	-0.9101	-1.074	-2.046			7.6787		-0.6436	0.0868	2.375
2015-10-02	13:59:00	6.4852	-0.4695	-0.3832	-1.8575			10.3147		-0.3918	0.0868	2.4378
2015-10-02	15:59:00	6.6733	-0.1549	0.119	-1.6063			8.9969		-0.0771	0.0868	2.6265
2015-10-02	17:59:00	5.3563	0.1597	0.3074	-1.4179			6.8625		0.1117	0.024	2.878
2015-10-02	19:59:00	4.039	0.1597	0.2446	-1.2923			5.2295		0.1117	0.024	3.1295
2015-10-02	21:59:00	2.9724	0.0968	0.119	-1.2295			3.9729		0.0487	0.024	3.2552
2015-10-02	23:59:00	2.4076	0.0968	0.0563	-1.1667			3.2815		0.0487	0.024	3.3181
2015-10-03	01:59:00	2.0311	0.0339	-0.0693	-1.1667			3.0301		-0.0771	0.024	3.3181
2015-10-03	03:59:00	2.0938	0.0339	-0.0693	-1.1039			3.0301		-0.0142	0.0868	3.2552
2015-10-03	05:59:00	2.2193	0.0968	0.0563	-1.0411			3.1558		0.0487	0.0868	3.2552
2015-10-03	07:59:00	1.8428	0.0339	-0.1321	-1.0411			2.7787		-0.0142	0.0868	3.1924
2015-10-03	09:59:00	1.8428	-0.029	-0.1321	-1.0411			3.6586		0.0487	0.0868	3.1295
2015-10-03	11:59:00	3.7253	0.0968	0.0563	-0.9155			7.1764		0.1746	0.0868	3.1295
2015-10-03	13:59:00	6.9869	0.1597	0.3074	-0.7899			10.4402		0.4893	0.0868	3.1295
2015-10-03	15:59:00	7.6139	0.726	1.0607	-0.6015			10.1892		0.8039	0.0868	3.2552
2015-10-03	17:59:00	7.175	1.2293	1.0607	-0.4132			8.3693		1.1814	0.0868	3.5067
2015-10-03	19:59:00	5.6072	1.3551	0.4957	-0.2248			6.2345		0.8668	0.0868	3.6324
2015-10-03	21:59:00	3.7881	0.5372	0.1818	-0.162			4.4127		0.3005	0.0868	3.7582
2015-10-03	23:59:00	2.6586	0.2227	-0.0693	-0.162			3.3444		0.1117	0.0868	3.821
2015-10-04	01:59:00	2.2821	0.1597	-0.0065	-0.2876			3.0301		0.1746	0.0868	3.821
2015-10-04	03:59:00	2.2821	0.1597	0.119	-0.2876			2.9673		0.2375	0.0868	3.7582
2015-10-04	05:59:00	1.9055	0.0968	-0.0065	-0.3504			2.5901		0.1746	0.1496	3.6953
2015-10-04	07:59:00	1.7173	0.0968	-0.0693	-0.4132			2.3387		0.1117	0.1496	3.5696
2015-10-04	09:59:00	1.78	0.1597	0.119	-0.3504			2.4644		0.3005	0.1496	3.5067
2015-10-04	11:59:00	2.4076	0.4114	0.4329	-0.2248			2.9044		0.678	0.1496	3.4439
2015-10-04	13:59:00	1.2779	0.0968	-0.0065	-0.2248			1.7728		0.1746	0.1496	3.381
2015-10-04	15:59:00	1.0268	-0.3437	-0.3205	-0.2876			1.5842		0.1117	0.1496	3.3181
2015-10-04	17:59:00	1.0268	-0.4066	-0.5088	-0.4132			1.7099		0.1746	0.1496	3.2552
2015-10-04	19:59:00	0.6502	-0.6583	-1.0112	-0.476			0.8925		0.0487	0.1496	3.1295
2015-10-04	21:59:00	0.148	-1.1619	-1.5135	-0.6015			0.1377		-0.203	0.1496	3.0666
2015-10-04	23:59:00	-0.2915	-1.3507	-1.6392	-0.6643			-0.4284		-0.3918	0.1496	2.9409
2015-10-05	01:59:00	-0.5427	-1.4766	-1.7648	-0.7899			-0.743		-0.5807	0.1496	2.878
2015-10-05	03:59:00	-0.6683	-1.4766	-1.702	-0.8527			-0.8059		-0.7066	0.1496	2.8151
2015-10-05	05:59:00	-0.7938	-1.4766	-1.7648	-0.9155			-0.8688		-0.8325	0.1496	2.7522
2015-10-05	07:59:00	-0.7938	-1.4136	-1.702	-0.9783			-0.743		-0.8954	0.1496	2.6265
2015-10-05	09:59:00	-0.6055	-1.1619	-1.3879	-0.9783			0.0748		-0.8325	0.1496	2.5636
2015-10-05	11:59:00	0.148	-0.5954	-0.5088	-0.9155			3.3444		-0.4548	0.1496	2.5007
2015-10-05	13:59:00	1.8428	-0.092	0.119	-0.7271			5.041		-0.0142	0.1496	2.4378
2015-10-05	15:59:00	4.039	0.0968	0.2446	-0.6015			7.1136		0.1746	0.1496	2.4378
2015-10-05	17:59:00	3.7881	0.2856	0.4329	-0.4132			5.9204		0.3634	0.1496	2.5007
2015-10-05	19:59:00	2.5959	0.2227	0.2446	-0.2876			4.2242		0.2375	0.0868	2.5636
2015-10-05	21:59:00	2.2821	0.2856	0.3702	-0.162			3.5958		0.3005	0.0868	2.5636
2015-10-05	23:59:00	2.1566	0.6002	0.6213	-0.0992			3.3444		0.4893	0.0868	2.6265
2015-10-06	01:59:00	2.2821	0.9776	0.9979	0.0263			3.2187		0.8039	0.0868	2.6265
2015-10-06	03:59:00	2.2821	1.0405	0.9352	0.0263			3.093		0.8668	0.0868	2.6265
2015-10-06	05:59:00	2.1566	0.9776	0.8096	0.0891			2.8416		0.8668	0.1496	2.6265
2015-10-06	07:59:00	2.0938	1.1034	0.9352	0.0891			2.7158		0.8668	0.1496	2.6894
2015-10-06	09:59:00	2.3449	1.2922	1.1235	0.0891			3.6586		1.0556	0.1496	2.6894
2015-10-06	11:59:00	3.9135	1.7325	1.8139	0.1519			6.1717		1.6847	0.1496	2.6894
2015-10-06	13:59:00	5.5445	2.2985	2.3788	0.2147			7.7415		2.2508	0.1496	2.7522
2015-10-06	15:59:00	5.8581	2.4242	2.4415	0.2775			7.7415		2.6282	0.1496	2.878
2015-10-06	17:59:00	5.2309	2.2985	2.1905	0.3403			6.7369		2.3766	0.1496	3.0038
2015-10-06	19:59:00	2.6586	1.4809	0.9979	0.2147			4.2242		1.5589	0.1496	3.1295
2015-10-06	21:59:00	1.78	0.9147	0.4329	0.2147			2.653		0.8668	0.1496	3.1924
2015-10-06	23:59:00	1.4034	0.726	0.3074	0.2147			2.2129		0.6151	0.1496	3.1924
2015-10-07	01:59:00	1.1524	0.6002	0.2446	0.2147			1.7728		0.4263	0.1496	3.1295
2015-10-07	03:59:00	0.964	0.5372	0.2446	0.2147			1.3956		0.3634	0.1496	3.0666
2015-10-07	05:59:00	0.8385	0.4743	0.2446	0.2147			1.2698		0.3005	0.1496	3.0038
2015-10-07	07:59:00	0.7757	0.4743	0.2446	0.2147			1.144		0.2375	0.1496	2.9409
2015-10-07	09:59:00	0.713	0.4114	0.2446	0.2147			1.0182		0.2375	0.1496	2.8151
2015-10-07	11:59:00	0.713	0.4114	0.2446	0.2147			0.9554		0.3005	0.1496	2.7522
2015-10-07	13:59:00	0.6502	0.4114	0.2446	0.2147			0.8925		0.3005	0.1496	2.6894
2015-10-07	15:59:00	0.6502	0.4114	0.3074	0.2147			0.8925		0.4263	0.1496	2.6265
2015-10-07	17:59:00	0.6502	0.4114	0.2446	0.2147			0.8296		0.4263	0.1496	2.5636
2015-10-07	19:59:00	0.5874	0.4114	0.2446	0.2147			0.8296		0.2375	0.1496	2.5007
2015-10-07	21:59:00	0.5874	0.3485	0.2446	0.2147			0.8296		0.0487	0.1496	2.4378
2015-10-07	23:59:00	0.5874	0.3485	0.2446	0.2147			0.8296		-0.0142	0.1496	2.375
2015-10-08	01:59:00	0.5874	0.3485	0.2446	0.2147			0.8296		0.0487	0.1496	2.375
2015-10-08	03:59:00	0.5874	0.3485	0.2446	0.2147			0.7667		-0.0142	0.1496	2.3121
2015-10-08	05:59:00	0.5874	0.3485	0.2446	0.2147			0.7038		-0.0142	0.1496	2.2492
2015-10-08	07:59:00	0.5874	0.2856	0.2446	0.2147			0.6409		-0.0771	0.1496	2.2492
2015-10-08	09:59:00	0.6502	0.2856	0.2446	0.2147			0.6409		0.1117	0.1496	2.1863
2015-10-08	11:59:00	0.6502	0.3485	0.2446	0.2147			0.8925		0.4893	0.1496	2.1863
2015-10-08	13:59:00	0.5874	0.4114	0.3074	0.2147			1.2069		1.5589	0.1496	2.1863
2015-10-08	15:59:00	0.5246	0.4743	0.3702	0.2147			1.2069		1.8105	0.1496	2.1234
2015-10-08	17:59:00	0.5246	0.5372	0.3074	0.2147			1.3327		1.3072	0.1496	2.1234
2015-10-08	19:59:00	0.5246	0.4743	0.3074	0.2147			0.9554		0.6151	0.2124	2.1234
2015-10-08	21:59:00	0.5246	0.4114	0.2446	0.2147			0.7667		0.2375	0.2124	2.1234
2015-10-08	23:59:00	0.5246	0.4114	0.2446	0.2147			0.578		0.1117	0.2124	2.1234
2015-10-09	01:59:00	0.5246	0.3485	0.1818	0.2147			0.4522		-0.3918	0.2124	2.0605
2015-10-09	03:59:00	0.3991	0.2856	-0.0065	0.2147			-0.051		-0.8325	0.2124	2.0605
2015-10-09	05:59:00	0.2735	0.0968	-0.1321	0.2147			-0.4913		-0.9584	0.2124	1.9976
2015-10-09	07:59:00	0.148	-0.092	-0.2577	0.2147			-0.8059		-1.0843	0.2124	1.9347
2015-10-09	09:59:00	0.0224	-0.2807	-0.3832	0.2147			0.1377		-0.9584	0.2124	1.8718
2015-10-09	11:59:00	0.2107	-0.2807	-0.3832	0.0891			4.664		-0.6436	0.2124	1.8718
2015-10-09	13:59:00	0.4618	-0.3437	-0.3205	0.0263			8.2437		-0.3918	0.2124	1.8718
2015-10-09	15:59:00	0.4618	-0.3437	-0.3205	-0.0364			8.9342		-0.203	0.2124	1.9347
2015-10-09	17:59:00	0.5246	-0.2178	-0.1949	-0.0364			6.7997		0.1117	0.2124	2.1234
2015-10-09	19:59:00	0.4618	-0.092	-0.3205	-0.0992			4.0985		-0.203	0.2124	2.3121
2015-10-09	21:59:00	0.2735	-0.2807	-0.5716	-0.2248			2.4015		-0.6436	0.2124	2.4378
2015-10-09	23:59:00	0.0852	-0.4066	-0.6972	-0.3504			1.5213		-0.8325	0.2124	2.5007
2015-10-10	01:59:00	-0.2287	-0.5954	-0.8228	-0.476			0.9554		-1.0843	0.2124	2.5007
2015-10-10	03:59:00	-0.4171	-0.7213	-0.9484	-0.6015			0.4522		-1.2731	0.2124	2.4378
2015-10-10	05:59:00	-0.6683	-0.9101	-1.074	-0.6643			0.0119		-1.3991	0.2124	2.375
2015-10-10	07:59:00	-0.8566	-1.036	-1.1996	-0.7899			-0.4913		-1.525	0.2124	2.3121
2015-10-10	09:59:00	-0.7938	-1.036	-1.2624	-0.8527			0.3264		-1.3991	0.2124	2.1863
2015-10-10	11:59:00	0.0224	-0.8472	-0.9484	-0.8527			5.8576		-0.5177	0.2124	2.1234
2015-10-10	13:59:00	0.9013	-0.4695	-0.5716	-0.7271			8.2437		-0.0771	0.2124	2.1234
2015-10-10	15:59:00	2.3449	-0.2178	-0.3205	-0.6015			8.3693		0.2375	0.2124	2.2492
2015-10-10	17:59:00	2.7841	-0.029	-0.1321	-0.476			6.5485		0.4893	0.2124	2.4378
2015-10-10	19:59:00	1.3407	0.0339	-0.2577	-0.476			4.0357		-0.0771	0.2124	2.6265
2015-10-10	21:59:00	0.4618	0.0339	-0.446	-0.5388			2.2758		-0.5807	0.2124	2.7522
2015-10-10	23:59:00	0.2735	-0.029	-0.446	-0.5388			1.4584		-0.5177	0.2124	2.8151
2015-10-11	01:59:00	0.0852	-0.092	-0.5088	-0.5388			1.0811		-0.6436	0.2124	2.8151
2015-10-11	03:59:00	-0.0404	-0.1549	-0.5716	-0.5388			0.7667		-0.8954	0.2124	2.7522
2015-10-11	05:59:00	-0.166	-0.2807	-0.6344	-0.5388			0.4522		-1.0213	0.2124	2.6265
2015-10-11	07:59:00	-0.3543	-0.3437	-0.6972	-0.6015			0.1377		-1.2102	0.2124	2.5636
2015-10-11	09:59:00	-0.166	-0.3437	-0.6344	-0.6015			0.1377		-0.8954	0.2124	2.5007
2015-10-11	11:59:00	0.964	-0.1549	-0.2577	-0.4132			1.6471		0.0487	0.2124	2.375
2015-10-11	13:59:00	2.0938	0.0339	-0.0065	-0.2248			2.653		0.8668	0.2124	2.3121
2015-10-11	15:59:00	2.0938	0.1597	0.119	-0.162			2.2758		0.9297	0.2124	2.3121
2015-10-11	17:59:00	1.7173	0.3485	0.1818	-0.0364			1.5842		0.678	0.2124	2.375
2015-10-11	19:59:00	0.4618	0.2227	0.119	-0.0364			0.578		-0.5807	0.2124	2.375
2015-10-11	21:59:00	-0.3543	0.1597	-0.1321	-0.2248			-0.2397		-1.1472	0.2124	2.375
2015-10-11	23:59:00	-1.045	0.0339	-0.5088	-0.4132			-0.8688		-1.525	0.2124	2.3121
2015-10-12	01:59:00	-1.4218	-0.3437	-0.8228	-0.6015			-1.2463		-1.6509	0.2124	2.2492
2015-10-12	03:59:00	-1.673	-0.6583	-1.074	-0.7899			-1.561		-1.7768	0.2124	2.1863
2015-10-12	05:59:00	-1.987	-0.9101	-1.2624	-0.8527			-1.8756		-1.9658	0.2124	2.0605
2015-10-12	07:59:00	-2.3011	-1.1619	-1.3879	-0.9783			-2.1274		-2.1547	0.2124	1.9976
2015-10-12	09:59:00	-2.3011	-1.2878	-1.5135	-1.0411			0.0748		-2.1547	0.2124	1.8718
2015-10-12	11:59:00	-0.2915	-1.4766	-1.6392	-1.1667			5.2923		-2.0287	0.2124	1.746
2015-10-12	13:59:00	3.4116	-1.4136	-1.5763	-1.2295			8.9342		-1.6509	0.2124	1.746
2015-10-12	15:59:00	5.2936	-1.2878	-1.3879	-1.2295			9.9382		-1.2102	0.2124	1.8718
2015-10-12	17:59:00	5.9835	-0.973	-1.1368	-1.1667			8.0554		-0.5177	0.2124	2.0605
2015-10-12	19:59:00	3.3489	-0.9101	-1.2624	-1.1667			5.1038		-1.0213	0.2124	2.2492
2015-10-12	21:59:00	1.7173	-1.0989	-1.4507	-1.2295			3.2187		-1.3361	0.2124	2.375
2015-10-12	23:59:00	1.0896	-1.1619	-1.4507	-1.2295			2.4015		-1.2102	0.2124	2.4378
2015-10-13	01:59:00	0.5874	-1.0989	-1.3251	-1.2295			1.7099		-1.2102	0.2124	2.4378
2015-10-13	03:59:00	0.3991	-0.973	-1.1996	-1.1667			1.3327		-1.0843	0.2124	2.375
2015-10-13	05:59:00	0.3363	-0.9101	-1.1368	-1.1039			1.0811		-1.0213	0.2124	2.3121
2015-10-13	07:59:00	0.3363	-0.8472	-1.0112	-1.0411			0.9554		-0.9584	0.2124	2.2492
2015-10-13	09:59:00	0.3363	-0.7213	-0.8856	-0.9783			0.8925		-0.8954	0.2124	2.1863
2015-10-13	11:59:00	0.3991	-0.5954	-0.76	-0.8527			0.8296		-0.7066	0.2124	2.1234
2015-10-13	13:59:00	0.4618	-0.4066	-0.5088	-0.7899			0.7667		-0.5177	0.1496	2.1234
2015-10-13	15:59:00	0.4618	-0.2807	-0.3832	-0.7271			0.7038		-0.3918	0.1496	2.0605
2015-10-13	17:59:00	0.4618	-0.2178	-0.3205	-0.6643			0.7038		-0.3289	0.1496	1.9976
2015-10-13	19:59:00	0.3991	-0.1549	-0.3205	-0.6015			0.7038		-0.3289	0.1496	1.9976
2015-10-13	21:59:00	0.3991	-0.1549	-0.3205	-0.6015			0.6409		-0.3289	0.1496	1.9347
2015-10-13	23:59:00	0.3991	-0.1549	-0.3832	-0.6015			0.6409		-0.3289	0.1496	1.8718
2015-10-14	01:59:00	0.3991	-0.2807	-0.446	-0.6015			0.578		-0.4548	0.1496	1.8718
2015-10-14	03:59:00	0.3991	-0.5325	-0.5088	-0.6015			0.4522		-0.5177	0.1496	1.8718
2015-10-14	05:59:00	0.3991	-0.7213	-0.5088	-0.6015			0.4522		-0.5807	0.1496	1.8089
2015-10-14	07:59:00	0.3991	-0.973	-0.5716	-0.6643			0.4522		-0.7066	0.1496	1.8089
2015-10-14	09:59:00	0.3991	-1.0989	-0.6344	-0.7271			0.3893		-0.8325	0.1496	1.746
2015-10-14	11:59:00	0.3991	-1.2248	-0.76	-0.7271			0.4522		-0.9584	0.1496	1.746
2015-10-14	13:59:00	0.3991	-1.0989	-0.76	-0.7899			0.4522		-1.0213	0.1496	1.746
2015-10-14	15:59:00	0.3991	-0.8472	-0.6972	-0.7271			0.5151		-1.0213	0.1496	1.746
2015-10-14	17:59:00	0.3991	-0.7213	-0.6344	-0.7271			0.5151		-1.0213	0.1496	1.6832
2015-10-14	19:59:00	0.3991	-0.7213	-0.6344	-0.7271			0.5151		-1.0213	0.1496	1.6832
2015-10-14	21:59:00	0.3991	-0.7213	-0.6344	-0.7271			0.5151		-1.0213	0.1496	1.6832
2015-10-14	23:59:00	0.3991	-0.6583	-0.6344	-0.7271			0.5151		-0.9584	0.1496	1.6832
2015-10-15	01:59:00	0.3991	-0.6583	-0.5716	-0.7271			0.5151		-0.9584	0.1496	1.6203
2015-10-15	03:59:00	0.3991	-0.5954	-0.5716	-0.7271			0.4522		-0.8954	0.1496	1.6203
2015-10-15	05:59:00	0.3991	-0.5954	-0.5716	-0.7271			0.4522		-0.8954	0.1496	1.6203
2015-10-15	07:59:00	0.3991	-0.5325	-0.5716	-0.6643			0.3893		-0.8954	0.1496	1.6203
2015-10-15	09:59:00	0.3991	-0.5325	-0.5716	-0.6643			0.3264		-0.8954	0.1496	1.6203
2015-10-15	11:59:00	0.3991	-0.4695	-0.5088	-0.6643			0.3893		-0.8954	0.1496	1.5574
2015-10-15	13:59:00	0.3991	-0.4066	-0.5088	-0.6643			0.4522		-0.8325	0.1496	1.5574
2015-10-15	15:59:00	0.3991	-0.3437	-0.446	-0.6015			0.4522		-0.8325	0.1496	1.5574
2015-10-15	17:59:00	0.3991	-0.2807	-0.3832	-0.6015			0.4522		-0.7695	0.1496	1.5574
2015-10-15	19:59:00	0.3991	-0.2178	-0.3832	-0.6015			0.3893		-0.8325	0.1496	1.5574
2015-10-15	21:59:00	0.3991	-0.2807	-0.3832	-0.6015			0.3264		-1.0843	0.0868	1.5574
2015-10-15	23:59:00	0.3991	-0.3437	-0.446	-0.6015			0.2006		-1.2102	0.0868	1.5574
2015-10-16	01:59:00	0.3991	-0.3437	-0.5088	-0.6643			0.0119		-1.2731	0.0868	1.5574
2015-10-16	03:59:00	0.3991	-0.4066	-0.5088	-0.6643			-0.1139		-1.2731	0.0868	1.4945
2015-10-16	05:59:00	0.3991	-0.4066	-0.5088	-0.6643			-0.1768		-1.3361	0.0868	1.4945
2015-10-16	07:59:00	0.3991	-0.4066	-0.5088	-0.6643			-0.3026		-1.3991	0.0868	1.4945
2015-10-16	09:59:00	0.3991	-0.4066	-0.5088	-0.6643			-0.3655		-1.3991	0.0868	1.4945
2015-10-16	11:59:00	0.3991	-0.4066	-0.5088	-0.6643			-0.1768		-1.3361	0.0868	1.4945
2015-10-16	13:59:00	0.3991	-0.3437	-0.446	-0.6643			0.0748		-1.1472	0.0868	1.4945
2015-10-16	15:59:00	0.3991	-0.2178	-0.3832	-0.6015			0.2006		-0.9584	0.0868	1.4316
2015-10-16	17:59:00	0.3991	-0.1549	-0.3205	-0.6015			0.2635		-0.7695	0.0868	1.4316
2015-10-16	19:59:00	0.3991	-0.1549	-0.3205	-0.6015			0.2635		-0.8325	0.0868	1.4316
2015-10-16	21:59:00	0.3991	-0.2178	-0.3205	-0.6015			0.2006		-0.8954	0.0868	1.4316
2015-10-16	23:59:00	0.3991	-0.2807	-0.3832	-0.6015			-0.051		-1.0843	0.0868	1.4316
2015-10-17	01:59:00	0.3991	-0.3437	-0.446	-0.6015			-0.3026		-1.2731	0.0868	1.4316
2015-10-17	03:59:00	0.3991	-0.4066	-0.446	-0.6643			-0.5542		-1.462	0.0868	1.4316
2015-10-17	05:59:00	0.3991	-0.4695	-0.5088	-0.6643			-0.743		-1.588	0.0868	1.4316
2015-10-17	07:59:00	0.3991	-0.5954	-0.5088	-0.6643			-0.9317		-1.7139	0.0868	1.3687
2015-10-17	09:59:00	0.3991	-0.5954	-0.5716	-0.7271			-0.8688		-1.8398	0.0868	1.3687
2015-10-17	11:59:00	0.3991	-0.5954	-0.5716	-0.7271			-0.2397		-1.8398	0.0868	1.3687
2015-10-17	13:59:00	0.3991	-0.6583	-0.5716	-0.7271			0.0748		-1.7768	0.0868	1.3687
2015-10-17	15:59:00	0.3363	-0.5954	-0.5716	-0.7271			0.0748		-1.7139	0.0868	1.3687
2015-10-17	17:59:00	0.3363	-0.5954	-0.5716	-0.6643			0.0119		-1.8398	0.0868	1.3687
2015-10-17	19:59:00	0.3363	-0.5954	-0.5716	-0.7271			-0.1768		-1.9658	0.0868	1.3058
2015-10-17	21:59:00	0.3991	-0.6583	-0.5716	-0.7271			-0.4284		-2.0287	0.0868	1.3058
2015-10-17	23:59:00	0.3991	-0.7213	-0.6344	-0.7271			-0.6172		-2.0287	0.0868	1.3058
2015-10-18	01:59:00	0.3363	-0.8472	-0.6972	-0.7271			-0.8059		-2.0287	0.0868	1.3058
2015-10-18	03:59:00	0.3991	-0.973	-0.76	-0.7271			-0.8688		-2.0917	0.0868	1.3058
2015-10-18	05:59:00	0.3363	-1.0989	-0.8228	-0.7899			-0.9317		-2.0917	0.0868	1.2428
2015-10-18	07:59:00	0.3363	-1.1619	-0.8856	-0.7899			-0.9947		-2.1547	0.0868	1.2428
2015-10-18	09:59:00	0.3363	-1.2248	-0.9484	-0.7899			-1.0576		-2.1547	0.0868	1.2428
2015-10-18	11:59:00	0.3363	-1.2248	-0.9484	-0.7899			-0.9317		-2.1547	0.0868	1.2428
2015-10-18	13:59:00	0.3363	-1.036	-0.8856	-0.7899			-0.743		-2.0287	0.0868	1.1799
2015-10-18	15:59:00	0.3363	-0.9101	-0.8228	-0.7899			-0.6172		-1.9028	0.0868	1.1799
2015-10-18	17:59:00	0.3363	-1.036	-0.8228	-0.7899			-0.6172		-1.8398	0.0868	1.1799
2015-10-18	19:59:00	0.3363	-1.2248	-0.8856	-0.7899			-0.743		-1.8398	0.0868	1.1799
2015-10-18	21:59:00	0.3363	-1.3507	-0.9484	-0.7899			-0.8688		-1.9028	0.024	1.117
2015-10-18	23:59:00	0.3363	-1.5395	-1.0112	-0.8527			-0.9947		-1.9658	0.0868	1.117
2015-10-19	01:59:00	0.3363	-1.6025	-1.074	-0.8527			-1.1205		-2.0287	0.0868	1.117
2015-10-19	03:59:00	0.3363	-1.7284	-1.1368	-0.9155			-1.2463		-2.0917	0.024	1.117
2015-10-19	05:59:00	0.3363	-1.7914	-1.1996	-0.9155			-1.3093		-2.2176	0.024	1.117
2015-10-19	07:59:00	0.3363	-1.8543	-1.2624	-0.9783			-1.3722		-2.2806	0.024	1.0541
2015-10-19	09:59:00	0.3363	-1.9173	-1.3251	-0.9783			-1.498		-2.3436	0.024	1.0541
2015-10-19	11:59:00	0.3363	-1.8543	-1.2624	-0.9783			-1.3093		-2.3436	0.024	1.0541
2015-10-19	13:59:00	0.3363	-1.6654	-1.1996	-0.9783			-0.9947		-2.2176	0.024	1.0541
2015-10-19	15:59:00	0.3363	-1.4766	-1.1368	-0.9783			-0.4913		-2.0917	0.024	0.9912
2015-10-19	17:59:00	0.3363	-1.4766	-1.074	-0.9783			-0.3026		-2.0287	0.024	0.9912
2015-10-19	19:59:00	0.3363	-1.6025	-1.1368	-0.9783			-0.4913		-2.0287	0.024	0.9912
2015-10-19	21:59:00	0.3363	-1.7284	-1.2624	-1.0411			-0.8688		-2.0917	0.024	0.9912
2015-10-19	23:59:00	0.3363	-1.8543	-1.3251	-1.1039			-1.2463		-2.2806	0.024	0.9912
2015-10-20	01:59:00	0.3363	-1.9802	-1.4507	-1.1667			-1.498		-2.4066	0.024	0.9912
2015-10-20	03:59:00	0.3363	-2.0432	-1.5135	-1.2295			-1.6868		-2.5325	0.024	0.9912
2015-10-20	05:59:00	0.3363	-2.1061	-1.6392	-1.2923			-1.8756		-2.6585	-0.0388	0.9912
2015-10-20	07:59:00	0.3363	-2.1691	-1.702	-1.3551			-2.0644		-2.7845	-0.0388	0.9283
2015-10-20	09:59:00	0.3363	-2.2321	-1.702	-1.4179			-1.8756		-2.9104	-0.0388	0.9283
2015-10-20	11:59:00	0.3363	-2.2321	-1.7648	-1.4807			-0.8688		-2.9104	-0.0388	0.9283
2015-10-20	13:59:00	0.3363	-2.295	-1.7648	-1.4807			-0.1139		-2.9104	-0.0388	0.9283
2015-10-20	15:59:00	0.3363	-2.358	-1.7648	-1.4807			0.1377		-2.9104	-0.0388	0.8654
2015-10-20	17:59:00	0.3363	-2.4839	-1.7648	-1.5435			0.2635		-2.8475	-0.0388	0.8654
2015-10-20	19:59:00	0.3363	-2.6099	-1.8276	-1.5435			0.2006		-2.7845	-0.0388	0.8654
2015-10-20	21:59:00	0.3363	-2.7358	-1.8904	-1.6063			-0.6172		-2.9104	-0.0388	0.8654
2015-10-20	23:59:00	0.3363	-2.8617	-2.016	-1.6063			-1.3093		-3.0364	-0.1016	0.8654
2015-10-21	01:59:00	0.3363	-2.9247	-2.0788	-1.6691			-1.8756		-3.1624	-0.1016	0.8654
2015-10-21	03:59:00	0.3363	-2.9877	-2.1416	-1.7319			-2.3791		-3.2884	-0.1016	0.8654
2015-10-21	05:59:00	0.3363	-2.9877	-2.2044	-1.7947			-2.8827		-3.4774	-0.1016	0.8654
2015-10-21	07:59:00	0.3363	-3.0507	-2.2044	-1.8575			-3.3233		-3.9184	-0.1016	0.8654
2015-10-21	09:59:00	0.3363	-3.1136	-2.2672	-1.8575			-2.6938		-4.0444	-0.1016	0.8654
2015-10-21	11:59:00	0.3363	-3.0507	-2.2672	-1.9203			-0.9947		-4.1074	-0.1016	0.8025
2015-10-21	13:59:00	0.3363	-2.9247	-2.2044	-1.9203			0.0119		-3.9184	-0.1644	0.8025
2015-10-21	15:59:00	0.3363	-2.7988	-2.1416	-1.9203			0.8925		-3.6664	-0.1644	0.8025
2015-10-21	17:59:00	0.3363	-2.7358	-2.0788	-1.9203			1.0811		-3.4774	-0.1644	0.7396
2015-10-21	19:59:00	0.3363	-2.6728	-2.0788	-1.9203			0.2635		-3.2884	-0.1644	0.7396
2015-10-21	21:59:00	0.3363	-2.7988	-2.1416	-1.9832			-0.3026		-3.2884	-0.1644	0.7396
2015-10-21	23:59:00	0.3363	-2.8617	-2.2044	-1.9832			-1.2463		-3.3514	-0.2273	0.8025
2015-10-22	01:59:00	0.3363	-2.9247	-2.2044	-2.046			-2.0015		-3.4144	-0.2273	0.8025
2015-10-22	03:59:00	0.3363	-2.9877	-2.2672	-2.046			-2.6938		-3.4774	-0.2273	0.8025
2015-10-22	05:59:00	0.3363	-3.0507	-2.2672	-2.1088			-3.2604		-3.5404	-0.2273	0.8025
2015-10-22	07:59:00	0.3363	-3.2396	-2.33	-2.1088			-3.7011		-3.6034	-0.2273	0.8025
2015-10-22	09:59:00	0.3363	-3.3655	-2.33	-2.1088			-2.4421		-3.6034	-0.2273	0.7396
2015-10-22	11:59:00	0.3363	-3.4285	-2.33	-2.1088			-0.3655		-3.6664	-0.2901	0.7396
2015-10-22	13:59:00	0.3363	-3.5545	-2.33	-2.1088			2.4644		-3.6664	-0.2901	0.7396
2015-10-22	15:59:00	0.3363	-3.6175	-2.33	-2.1716			3.4701		-3.6664	-0.2901	0.6767
2015-10-22	17:59:00	0.3363	-3.6175	-2.33	-2.1716			1.5213		-3.6034	-0.2901	0.6767
2015-10-22	19:59:00	0.3363	-3.5545	-2.3928	-2.1716			0.3264		-3.6034	-0.2901	0.6767
2015-10-22	21:59:00	0.3363	-3.3026	-2.33	-2.1716			-0.1139		-3.5404	-0.2901	0.6767
2015-10-22	23:59:00	0.3363	-2.8617	-2.2044	-2.1716			-0.051		-3.2884	-0.3529	0.6767
2015-10-23	01:59:00	0.3363	-2.6099	-2.0788	-2.1088			-0.2397		-3.0364	-0.3529	0.7396
2015-10-23	03:59:00	0.2735	-2.421	-2.016	-2.1088			-0.3026		-2.8475	-0.3529	0.7396
2015-10-23	05:59:00	0.2735	-2.295	-1.8904	-2.046			-0.3655		-2.7215	-0.3529	0.7396
2015-10-23	07:59:00	0.2735	-2.1061	-1.7648	-1.9832			-0.3655		-2.5955	-0.3529	0.7396
2015-10-23	09:59:00	0.2735	-1.9173	-1.702	-1.9203			-0.051		-2.4066	-0.4157	0.7396
2015-10-23	11:59:00	0.2735	-2.0432	-1.6392	-1.8575			3.093		-2.4066	-0.4157	0.7396
2015-10-23	13:59:00	0.2735	-2.1061	-1.702	-1.8575			7.302		-2.4696	-0.4157	0.7396
2015-10-23	15:59:00	0.2735	-2.1691	-1.702	-1.8575			8.0554		-2.4696	-0.4157	0.7396
2015-10-23	17:59:00	0.2735	-2.1691	-1.702	-1.9203			5.4179		-2.4696	-0.4157	0.7396
2015-10-23	19:59:00	0.2735	-2.2321	-1.7648	-2.046			2.653		-2.5325	-0.4157	0.7396
2015-10-23	21:59:00	0.2735	-2.295	-1.8276	-2.1716			1.5842		-2.5955	-0.4157	0.8025
2015-10-23	23:59:00	0.2735	-2.421	-1.8904	-2.2972			1.0182		-2.6585	-0.4157	0.8025
2015-10-24	01:59:00	0.2735	-2.4839	-1.9532	-2.36			0.7667		-2.6585	-0.4157	0.8025
2015-10-24	03:59:00	0.2735	-2.5469	-2.016	-2.4856			0.4522		-2.6585	-0.4157	0.8654
2015-10-24	05:59:00	0.2735	-2.6099	-2.016	-2.5485			0.3264		-2.6585	-0.4157	0.8654
2015-10-24	07:59:00	0.2735	-2.6728	-2.0788	-2.6113			0.3264		-2.6585	-0.4157	0.8654
2015-10-24	09:59:00	0.2735	-2.6099	-2.0788	-2.6113			2.653		-2.5955	-0.4157	0.8654
2015-10-24	11:59:00	0.2735	-2.4839	-2.016	-2.5485			6.6741		-2.4066	-0.4157	0.8654
2015-10-24	13:59:00	0.2735	-2.358	-1.9532	-2.4856			10.3147		-2.2176	-0.4157	0.8654
2015-10-24	15:59:00	0.2735	-2.1691	-1.8276	-2.4228			10.4402		-2.0287	-0.4157	0.8654
2015-10-24	17:59:00	0.2735	-1.9802	-1.702	-2.36			8.1809		-1.7768	-0.4785	0.9283
2015-10-24	19:59:00	0.2735	-1.9802	-1.702	-2.36			5.5436		-1.8398	-0.4157	0.9912
2015-10-24	21:59:00	0.2735	-1.9802	-1.7648	-2.36			3.9729		-1.9028	-0.4785	1.0541
2015-10-24	23:59:00	0.2735	-1.9802	-1.7648	-2.4228			2.8416		-1.9028	-0.4785	1.117
2015-10-25	01:59:00	0.2735	-1.9802	-1.702	-2.36			1.8986		-1.9028	-0.4785	1.117
2015-10-25	03:59:00	0.2735	-1.9173	-1.702	-2.36			1.2698		-1.9028	-0.4785	1.1799
2015-10-25	05:59:00	0.2735	-1.8543	-1.702	-2.2972			0.8925		-1.9028	-0.4785	1.1799
2015-10-25	07:59:00	0.2735	-1.7284	-1.6392	-2.2344			0.578		-1.8398	-0.4785	1.1799
2015-10-25	09:59:00	0.2735	-1.6654	-1.5763	-2.1716			1.4584		-1.7768	-0.4785	1.1799
2015-10-25	11:59:00	0.2735	-1.4766	-1.4507	-1.9832			4.8525		-1.525	-0.4785	1.117
2015-10-25	13:59:00	0.2735	-1.2248	-1.2624	-1.7947			4.8525		-1.2731	-0.4785	1.1799
2015-10-25	15:59:00	0.2735	-0.973	-1.074	-1.6063			5.8576		-1.0213	-0.4785	1.1799
2015-10-25	17:59:00	0.2735	-0.9101	-1.0112	-1.6063			5.1038		-0.9584	-0.4785	1.1799
2015-10-25	19:59:00	0.2735	-1.036	-1.1368	-1.7319			3.1558		-1.0843	-0.4785	1.2428
2015-10-25	21:59:00	0.2735	-1.2248	-1.1996	-1.8575			1.8986		-1.2102	-0.4785	1.3058
2015-10-25	23:59:00	0.2735	-1.4136	-1.3251	-1.9832			1.2069		-1.3361	-0.4785	1.3058
2015-10-26	01:59:00	0.2735	-1.5395	-1.4507	-2.046			0.7667		-1.3991	-0.4785	1.3058
2015-10-26	03:59:00	0.2735	-1.6654	-1.5135	-2.1088			0.4522		-1.462	-0.4785	1.3058
2015-10-26	05:59:00	0.2735	-1.7284	-1.5763	-2.1716			0.2006		-1.525	-0.4157	1.2428
2015-10-26	07:59:00	0.2735	-1.6654	-1.5763	-2.1716			-0.1768		-1.588	-0.4157	1.2428
2015-10-26	09:59:00	0.2735	-1.6654	-1.5763	-2.2344			1.8357		-1.6509	-0.4157	1.2428
2015-10-26	11:59:00	0.2735	-1.6654	-1.5763	-2.2344			6.8625		-1.525	-0.4157	1.1799
2015-10-26	13:59:00	0.2735	-1.5395	-1.5135	-2.2344			9.6245		-1.3991	-0.4157	1.1799
2015-10-26	15:59:00	0.2735	-1.4136	-1.4507	-2.1716			9.8755		-1.3361	-0.4785	1.2428
2015-10-26	17:59:00	0.2735	-1.3507	-1.3879	-2.1716			7.7415		-1.1472	-0.4785	1.3687
2015-10-26	19:59:00	0.2735	-1.3507	-1.4507	-2.1716			5.1038		-1.2102	-0.4785	1.4945
2015-10-26	21:59:00	0.2735	-1.4766	-1.5135	-2.2344			3.4701		-1.2731	-0.4785	1.5574
2015-10-26	23:59:00	0.2735	-1.6654	-1.6392	-2.36			2.3387		-1.3991	-0.4785	1.6203
2015-10-27	01:59:00	0.2735	-1.6654	-1.702	-2.36			1.5842		-1.462	-0.4785	1.6203
2015-10-27	03:59:00	0.2735	-1.7914	-1.702	-2.4228			1.0811		-1.525	-0.4785	1.6203
2015-10-27	05:59:00	0.2735	-1.9173	-1.7648	-2.4856			0.6409		-1.7139	-0.4785	1.5574
2015-10-27	07:59:00	0.2735	-2.0432	-1.8904	-2.6113			0.2006		-1.9028	-0.4785	1.4945
2015-10-27	09:59:00	0.2735	-2.1061	-1.9532	-2.6741			2.4015		-1.9028	-0.4785	1.4316
2015-10-27	11:59:00	0.2735	-2.1061	-2.016	-2.7369			7.3648		-1.8398	-0.4785	1.4316
2015-10-27	13:59:00	0.2735	-1.9802	-1.9532	-2.6741			10.3147		-1.7139	-0.4785	1.4316
2015-10-27	15:59:00	0.2735	-1.7914	-1.8276	-2.6113			10.3774		-1.462	-0.4785	1.5574
2015-10-27	17:59:00	0.2735	-1.5395	-1.702	-2.4856			7.8671		-1.2102	-0.4785	1.6832
2015-10-27	19:59:00	0.2735	-1.6025	-1.7648	-2.5485			5.1666		-1.3361	-0.4785	1.8718
2015-10-27	21:59:00	0.2735	-1.6654	-1.8276	-2.5485			3.7215		-1.462	-0.4785	1.9347
2015-10-27	23:59:00	0.2735	-1.7284	-1.8276	-2.5485			2.7787		-1.462	-0.4785	1.9976
2015-10-28	01:59:00	0.2735	-1.6654	-1.8276	-2.4856			2.2758		-1.3361	-0.5413	1.9347
2015-10-28	03:59:00	0.2735	-1.6654	-1.7648	-2.4856			1.8357		-1.3361	-0.5413	1.9347
2015-10-28	05:59:00	0.2735	-1.5395	-1.702	-2.36			1.7099		-1.1472	-0.5413	1.8718
2015-10-28	07:59:00	0.2735	-1.4136	-1.6392	-2.2972			1.5842		-0.9584	-0.5413	1.8089
2015-10-28	09:59:00	0.2735	-1.2248	-1.4507	-2.1716			2.1501		-0.6436	-0.5413	1.746
2015-10-28	11:59:00	0.2735	-0.9101	-1.2624	-1.9203			5.2923		-0.3918	-0.5413	1.6832
2015-10-28	13:59:00	0.3363	-0.6583	-1.0112	-1.7319			5.4179		-0.203	-0.5413	1.746
2015-10-28	15:59:00	0.2735	-0.5325	-0.8228	-1.6063			5.8576		-0.0771	-0.5413	1.8089
2015-10-28	17:59:00	0.2735	-0.4695	-0.8228	-1.6063			4.9782		-0.0771	-0.5413	1.8718
2015-10-28	19:59:00	0.3363	-0.5954	-0.8856	-1.6691			3.2815		-0.3918	-0.5413	1.9347
2015-10-28	21:59:00	0.2735	-0.7842	-1.0112	-1.7947			2.4015		-0.5807	-0.5413	1.9347
2015-10-28	23:59:00	0.2735	-0.9101	-1.1368	-1.8575			1.8986		-0.6436	-0.5413	1.9347
2015-10-29	01:59:00	0.2735	-0.973	-1.1368	-1.7947			1.7099		-0.5807	-0.5413	1.9347
2015-10-29	03:59:00	0.2735	-0.973	-1.1368	-1.7947			1.3956		-0.6436	-0.5413	1.8718
2015-10-29	05:59:00	0.2735	-0.973	-1.1368	-1.7947			1.0811		-0.7066	-0.4785	1.8089
2015-10-29	07:59:00	0.2735	-0.973	-1.1368	-1.7319			0.8925		-0.7066	-0.4785	1.746
2015-10-29	09:59:00	0.2735	-0.973	-1.074	-1.6691			0.8296		-0.7066	-0.4785	1.746
2015-10-29	11:59:00	0.2735	-0.7842	-1.0112	-1.6063			1.5213		-0.5177	-0.4785	1.6832
2015-10-29	13:59:00	0.2735	-0.5954	-0.8228	-1.4807			3.0301		-0.2659	-0.4785	1.6203
2015-10-29	15:59:00	0.3363	-0.4066	-0.6344	-1.2923			3.9729		-0.0771	-0.4785	1.6203
2015-10-29	17:59:00	0.2735	-0.2807	-0.5716	-1.2295			2.9673		0.0487	-0.4785	1.6203
2015-10-29	19:59:00	0.2735	-0.2178	-0.5716	-1.2295			1.3327		-0.0142	-0.4785	1.6832
2015-10-29	21:59:00	0.2735	-0.2807	-0.6344	-1.2923			0.7667		-0.1401	-0.4785	1.6832
2015-10-29	23:59:00	0.2735	-0.4066	-0.76	-1.4807			0.4522		-0.3289	-0.4785	1.6203
2015-10-30	01:59:00	0.2735	-0.5954	-0.8228	-1.5435			0.2635		-0.5177	-0.4785	1.6203
2015-10-30	03:59:00	0.2735	-0.7213	-0.8228	-1.5435			0.1377		-0.6436	-0.4785	1.5574
2015-10-30	05:59:00	0.3363	-0.8472	-0.8856	-1.6063			0.0119		-0.7695	-0.4157	1.4945
2015-10-30	07:59:00	0.2735	-0.973	-0.9484	-1.6063			-0.051		-0.8325	-0.4157	1.4316
2015-10-30	09:59:00	0.2735	-1.036	-1.0112	-1.6063			1.7099		-0.8325	-0.4157	1.3687
2015-10-30	11:59:00	0.2735	-0.973	-0.9484	-1.6063			6.2973		-0.6436	-0.4157	1.3687
2015-10-30	13:59:00	0.2735	-0.8472	-0.9484	-1.6063			9.6245		-0.4548	-0.4157	1.3687
2015-10-30	15:59:00	0.2735	-0.7842	-0.8856	-1.5435			10.5029		-0.3918	-0.4157	1.4945
2015-10-30	17:59:00	0.2735	-0.7842	-0.8856	-1.6063			8.4948		-0.3289	-0.4157	1.746
2015-10-30	19:59:00	0.2735	-0.8472	-0.9484	-1.6691			5.7948		-0.5177	-0.4157	1.9976
2015-10-30	21:59:00	0.2735	-0.973	-1.0112	-1.6691			4.0985		-0.5807	-0.4157	2.1234
2015-10-30	23:59:00	0.2735	-1.036	-1.074	-1.7319			3.093		-0.7066	-0.4157	2.2492
2015-10-31	01:59:00	0.3363	-1.0989	-1.074	-1.7319			2.4644		-0.7066	-0.4157	2.3121
2015-10-31	03:59:00	0.3363	-1.1619	-1.1368	-1.7319			2.1501		-0.7695	-0.4157	2.2492
2015-10-31	05:59:00	0.3363	-1.2248	-1.1368	-1.7947			1.8357		-0.8325	-0.4157	2.1863
2015-10-31	07:59:00	0.3363	-1.3507	-1.1996	-1.7947			1.6471		-1.0213	-0.4157	2.1234
2015-10-31	09:59:00	0.3363	-1.4136	-1.2624	-1.8575			3.7215		-1.0843	-0.4157	2.0605
2015-10-31	11:59:00	0.2735	-1.4136	-1.2624	-1.9203			7.6787		-1.0843	-0.4157	1.9976
2015-10-31	13:59:00	0.3363	-1.2878	-1.2624	-1.9203			10.6284		-0.8954	-0.4157	1.9976
2015-10-31	15:59:00	0.3363	-1.1619	-1.1996	-1.8575			11.0675		-0.7695	-0.4157	2.1234
2015-10-31	17:59:00	0.3363	-1.0989	-1.1368	-1.8575			8.7459		-0.5807	-0.4157	2.375
2015-10-31	19:59:00	0.3363	-1.1619	-1.1996	-1.9203			6.3601		-0.7066	-0.4785	2.5636
2015-10-31	21:59:00	0.3363	-1.2248	-1.2624	-1.9203			4.7897		-0.7695	-0.4785	2.7522
2015-10-31	23:59:00	0.3363	-1.3507	-1.3251	-1.9832			3.7843		-0.7695	-0.4785	2.8151
2015-11-01	01:59:00	0.3363	-1.4136	-1.3251	-1.9832			3.0301		-0.8325	-0.4785	2.8151
2015-11-01	03:59:00	0.3363	-1.5395	-1.3879	-2.046			2.3387		-1.0213	-0.4785	2.7522
2015-11-01	05:59:00	0.3363	-1.6654	-1.5135	-2.1088			1.8357		-1.2102	-0.4785	2.6894
2015-11-01	07:59:00	0.3363	-1.8543	-1.5763	-2.2344			1.5842		-1.3991	-0.4785	2.5636
2015-11-01	09:59:00	0.3363	-1.9802	-1.702	-2.2972			3.7843		-1.462	-0.4785	2.5007
2015-11-01	11:59:00	0.3363	-1.9802	-1.7648	-2.36			7.6159		-1.588	-0.4785	2.375
2015-11-01	13:59:00	0.3363	-1.9173	-1.7648	-2.4228			10.1892		-1.462	-0.4785	2.375
2015-11-01	15:59:00	0.3363	-1.8543	-1.702	-2.4228			10.0637		-1.3991	-0.4785	2.4378
2015-11-01	17:59:00	0.3363	-1.8543	-1.7648	-2.4856			7.6787		-1.3361	-0.5413	2.6894
2015-11-01	19:59:00	0.3363	-1.9802	-1.8276	-2.5485			5.041		-1.6509	-0.5413	2.878
2015-11-01	21:59:00	0.3363	-2.1691	-1.9532	-2.6741			3.5329		-1.8398	-0.5413	2.9409
2015-11-01	23:59:00	0.3363	-2.358	-2.0788	-2.7369			2.653		-2.0287	-0.5413	2.9409
2015-11-02	01:59:00	0.3363	-2.5469	-2.2044	-2.7997			1.8986		-2.1547	-0.5413	2.9409
2015-11-02	03:59:00	0.3363	-2.6728	-2.2672	-2.9254			1.4584		-2.4066	-0.5413	2.8151
2015-11-02	05:59:00	0.3363	-2.7988	-2.3928	-2.9882			1.0811		-2.3436	-0.5413	2.6894
2015-11-02	07:59:00	0.2735	-2.9247	-2.4556	-3.051			1.0811		-2.3436	-0.5413	2.5636
2015-11-02	09:59:00	0.2735	-2.9247	-2.5185	-3.1138			3.4701		-2.4066	-0.6041	2.4378
2015-11-02	11:59:00	0.2107	-2.8617	-2.5185	-3.1766			7.3648		-2.4066	-0.6041	2.3121
2015-11-02	13:59:00	0.2735	-2.7358	-2.4556	-3.1766			9.4362		-2.1547	-0.6041	2.3121
2015-11-02	15:59:00	0.3363	-2.5469	-2.3928	-3.1766			9.6872		-1.9028	-0.6041	2.4378
2015-11-02	17:59:00	0.3363	-2.4839	-2.33	-3.1766			7.6159		-1.525	-0.6669	2.6265
2015-11-02	19:59:00	0.3363	-2.5469	-2.3928	-3.1766			5.3551		-1.588	-0.6669	2.8151
2015-11-02	21:59:00	0.3363	-2.6099	-2.4556	-3.2395			4.0357		-1.6509	-0.6669	2.9409
2015-11-02	23:59:00	0.3363	-2.5469	-2.4556	-3.2395			3.5329		-1.0843	-0.6669	3.0038
2015-11-03	01:59:00	0.3363	-2.4839	-2.3928	-3.1766			3.2815		-0.9584	-0.6669	3.0038
2015-11-03	03:59:00	0.2735	-2.358	-2.33	-3.1138			3.0301		-0.7695	-0.7297	2.9409
2015-11-03	05:59:00	0.2735	-2.295	-2.33	-3.051			2.8416		-0.6436	-0.7297	2.878
2015-11-03	07:59:00	0.2735	-2.295	-2.33	-3.051			2.9044		-0.7695	-0.7297	2.8151
2015-11-03	09:59:00	0.2735	-2.2321	-2.2672	-3.051			5.1038		-0.3918	-0.7297	2.7522
2015-11-03	11:59:00	0.2735	-1.9802	-2.2044	-2.9882			9.4362		-0.3289	-0.7297	2.6894
2015-11-03	13:59:00	0.2735	-1.6654	-1.9532	-2.8625			11.632		0.0487	-0.7925	2.6894
2015-11-03	15:59:00	0.3363	-1.3507	-1.7648	-2.6741			10.6284		0.2375	-0.7925	2.8151
2015-11-03	17:59:00	0.3363	-1.036	-1.5135	-2.4856			8.5576		0.4893	-0.7925	3.0666
2015-11-03	19:59:00	0.3363	-0.9101	-1.3879	-2.2972			7.1136		0.4893	-0.7925	3.2552
2015-11-03	21:59:00	0.3363	-0.9101	-1.3879	-2.2344			6.2345		0.1746	-0.7925	3.381
2015-11-03	23:59:00	0.3363	-0.7842	-1.3251	-2.1716			5.7948		0.3634	-0.7925	3.4439
2015-11-04	01:59:00	0.3363	-0.6583	-1.1996	-1.9832			5.4179		0.3634	-0.7925	3.4439
2015-11-04	03:59:00	0.3363	-0.5954	-1.074	-1.8575			4.4755		0.1746	-0.7925	3.4439
2015-11-04	05:59:00	0.3363	-0.5954	-1.0112	-1.8575			3.9729		0.0487	-0.7925	3.4439
2015-11-04	07:59:00	0.3363	-0.7842	-1.074	-1.8575			3.2187		-0.2659	-0.7925	3.381
2015-11-04	09:59:00	0.3363	-0.973	-1.1996	-1.9203			4.4127		-0.4548	-0.7297	3.3181
2015-11-04	11:59:00	0.3363	-1.036	-1.1996	-1.9832			7.7415		-0.3289	-0.7297	3.2552
2015-11-04	13:59:00	0.3363	-0.8472	-1.074	-1.8575			8.9969		-0.0142	-0.7297	3.1924
2015-11-04	15:59:00	0.3363	-0.5325	-0.8856	-1.7319			8.1182		0.4263	-0.7297	3.3181
2015-11-04	17:59:00	0.3363	-0.4695	-0.8228	-1.6691			6.7369		0.2375	-0.7297	3.381
2015-11-04	19:59:00	0.3363	-0.5954	-0.8856	-1.6691			5.1038		-0.1401	-0.7297	3.5067
2015-11-04	21:59:00	0.3363	-0.8472	-1.0112	-1.7947			3.8472		-0.5807	-0.7297	3.5067
2015-11-04	23:59:00	0.3363	-1.0989	-1.1996	-1.9203			2.8416		-0.8954	-0.7297	3.5067
2015-11-05	01:59:00	0.3363	-1.3507	-1.3879	-2.1088			2.0243		-1.2102	-0.6669	3.4439
2015-11-05	03:59:00	0.3363	-1.5395	-1.5763	-2.2344			1.3956		-1.3991	-0.6669	3.3181
2015-11-05	05:59:00	0.3363	-1.6654	-1.6392	-2.2972			0.9554		-1.588	-0.6669	3.1924
2015-11-05	07:59:00	0.3991	-1.7284	-1.702	-2.36			0.7667		-1.588	-0.6669	3.0666
2015-11-05	09:59:00	0.3991	-1.6025	-1.6392	-2.2972			1.3956		-1.3991	-0.6669	2.9409
2015-11-05	11:59:00	0.3991	-1.4766	-1.5763	-2.2344			6.9253		-1.2102	-0.6669	2.8151
2015-11-05	13:59:00	0.3991	-1.4136	-1.5763	-2.2972			10.1892		-1.1472	-0.6669	2.8151
2015-11-05	15:59:00	0.3991	-1.3507	-1.5135	-2.2972			10.5656		-1.0213	-0.6669	2.878
2015-11-05	17:59:00	0.3991	-1.3507	-1.5135	-2.2972			8.432		-0.8325	-0.6669	3.1295
2015-11-05	19:59:00	0.3991	-1.5395	-1.6392	-2.36			5.9832		-1.3361	-0.6669	3.3181
2015-11-05	21:59:00	0.3991	-1.6654	-1.702	-2.4856			4.287		-1.6509	-0.6669	3.4439
2015-11-05	23:59:00	0.3991	-1.7284	-1.7648	-2.4856			2.9673		-1.7768	-0.7297	3.5067
2015-11-06	01:59:00	0.3991	-1.7914	-1.8276	-2.4856			2.0872		-1.9028	-0.7297	3.5067
2015-11-06	03:59:00	0.3991	-1.7914	-1.8276	-2.4856			1.5842		-1.8398	-0.7297	3.4439
2015-11-06	05:59:00	0.3991	-1.7284	-1.8276	-2.4228			1.2698		-1.7768	-0.7297	3.3181
2015-11-06	07:59:00	0.3991	-1.6654	-1.7648	-2.36			1.2069		-1.6509	-0.7297	3.2552
2015-11-06	09:59:00	0.3363	-1.6654	-1.7648	-2.2972			1.2698		-1.6509	-0.7297	3.1295
2015-11-06	11:59:00	0.3991	-1.6654	-1.702	-2.2972			5.4807		-1.6509	-0.7297	3.0038
2015-11-06	13:59:00	0.3991	-1.5395	-1.6392	-2.2344			9.1224		-1.462	-0.7297	2.9409
2015-11-06	15:59:00	0.3991	-1.3507	-1.5135	-2.1716			9.9382		-1.2102	-0.7297	3.0038
2015-11-06	17:59:00	0.3991	-1.1619	-1.3879	-2.046			8.0554		-0.9584	-0.7297	3.1295
2015-11-06	19:59:00	0.3991	-0.973	-1.1996	-1.9203			5.8576		-0.7066	-0.7925	3.2552
2015-11-06	21:59:00	0.3991	-0.7842	-1.074	-1.7947			4.4127		-0.6436	-0.7925	3.3181
2015-11-06	23:59:00	0.3991	-1.036	-1.1368	-1.7947			3.093		-1.2731	-0.7297	3.381
2015-11-07	01:59:00	0.3991	-1.2248	-1.3251	-1.8575			2.1501		-1.462	-0.7297	3.381
2015-11-07	03:59:00	0.3991	-1.4136	-1.5135	-2.046			1.5842		-1.525	-0.7297	3.3181
2015-11-07	05:59:00	0.3991	-1.4136	-1.5763	-2.046			1.6471		-1.2731	-0.7297	3.1924
2015-11-07	07:59:00	0.3991	-1.2248	-1.5135	-2.046			1.8986		-1.0213	-0.7297	3.0666
2015-11-07	09:59:00	0.3991	-0.8472	-1.2624	-1.8575			2.1501		-0.5177	-0.7297	3.0038
2015-11-07	11:59:00	0.3991	-0.4695	-0.76	-1.4179			3.093		0.0487	-0.7297	2.878
2015-11-07	13:59:00	0.3991	-0.2178	-0.3832	-0.9783			5.732		0.4893	-0.7297	2.878
2015-11-07	15:59:00	0.3991	-0.029	-0.1321	-0.6643			8.6831		0.4893	-0.7297	2.8151
2015-11-07	17:59:00	0.3991	0.0968	-0.0065	-0.4132			7.4904		0.6151	-0.7297	2.9409
2015-11-07	19:59:00	0.3991	0.1597	0.0563	-0.3504			5.6692		0.5522	-0.7297	3.0666
2015-11-07	21:59:00	0.3991	0.3485	0.119	-0.2876			4.664		0.5522	-0.6669	3.1924
2015-11-07	23:59:00	0.3991	0.5372	0.1818	-0.2248			4.0985		0.6151	-0.6669	3.2552
2015-11-08	01:59:00	0.3991	0.726	0.3702	-0.162			3.8472		0.741	-0.6041	3.2552
2015-11-08	03:59:00	0.3991	0.7889	0.4957	-0.0992			3.5958		0.8039	-0.6041	3.2552
2015-11-08	05:59:00	0.3991	0.5372	0.3702	-0.0992			3.4072		0.6151	-0.5413	3.2552
2015-11-08	07:59:00	0.3991	0.6631	0.4957	-0.0364			3.2187		0.678	-0.5413	3.1924
2015-11-08	09:59:00	0.3991	0.6631	0.4329	-0.0364			4.6012		0.5522	-0.4785	3.1924
2015-11-08	11:59:00	0.3991	0.6631	0.4957	0.0263			9.1852		0.6151	-0.4785	3.1295
2015-11-08	13:59:00	0.4618	0.6631	0.6213	0.0263			12.3846		0.9297	-0.4157	3.1924
2015-11-08	15:59:00	0.4618	0.9776	0.9979	0.0891			12.8235		1.3072	-0.4157	3.3181
2015-11-08	17:59:00	0.4618	1.1034	0.9352	0.0891			10.6911		1.4331	-0.4157	3.5067
2015-11-08	19:59:00	0.4618	0.9776	0.6841	0.0263			8.2437		1.1185	-0.3529	3.6953
2015-11-08	21:59:00	0.4618	0.9776	0.6213	-0.0364			6.7997		0.9297	-0.3529	3.8839
2015-11-08	23:59:00	0.5246	1.1034	0.8096	-0.0364			5.8576		0.9297	-0.3529	3.9468
2015-11-09	01:59:00	0.5246	1.2922	0.8724	-0.0364			5.2295		0.9927	-0.2901	3.9468
2015-11-09	03:59:00	0.5246	1.3551	0.8724	-0.0992			4.7269		0.8668	-0.2901	3.9468
2015-11-09	05:59:00	0.5246	1.1034	0.6213	-0.2248			4.1614		0.678	-0.2901	3.8839
2015-11-09	07:59:00	0.4618	0.8518	0.4329	-0.4132			3.5958		0.3634	-0.2901	3.821
2015-11-09	09:59:00	0.5246	0.6631	0.3702	-0.2248			4.287		0.4263	-0.2273	3.7582
2015-11-09	11:59:00	0.5874	0.6002	0.4329	-0.0364			4.7269		0.5522	-0.2273	3.6953
2015-11-09	13:59:00	0.6502	0.7889	0.8096	0.0891			6.1717		1.0556	-0.2273	3.6324
2015-11-09	15:59:00	0.6502	0.7889	0.7468	0.1519			5.3551		0.9927	-0.2273	3.5696
2015-11-09	17:59:00	0.5874	0.6002	0.4957	0.1519			4.4127		0.8039	-0.2273	3.5696
2015-11-09	19:59:00	0.5874	0.2856	0.2446	0.0891			3.2187		0.3005	-0.1644	3.5696
2015-11-09	21:59:00	0.5246	0.1597	0.1818	0.0263			2.5273		0.1117	-0.1644	3.5067
2015-11-09	23:59:00	0.3991	0.0968	-0.0693	-0.162			1.8357		-0.203	-0.1644	3.4439
2015-11-10	01:59:00	0.148	-0.092	-0.1949	-0.6015			1.4584		-0.3289	-0.1644	3.381
2015-11-10	03:59:00	-0.0404	0.0339	-0.0065	-0.7899			1.3956		-0.203	-0.1644	3.2552
2015-11-10	05:59:00	0.0852	0.0968	0.1818	-0.476			1.5842		0.1117	-0.1644	3.1924
2015-11-10	07:59:00	0.0852	0.1597	0.1818	-0.4132			1.4584		0.1117	-0.1644	3.0666
2015-11-10	09:59:00	0.148	0.3485	0.2446	-0.0992			1.8357		0.2375	-0.1644	3.0038
2015-11-10	11:59:00	0.5246	0.6002	0.4957	0.0891			3.91		0.5522	-0.1016	2.878
2015-11-10	13:59:00	1.8428	0.726	0.6841	0.1519			8.2437		0.741	-0.1016	2.878
2015-11-10	15:59:00	2.7841	0.9776	0.8724	0.2147			9.4362		0.9927	-0.1016	2.9409
2015-11-10	17:59:00	1.9055	1.1663	0.8096	0.2147			8.0554		1.1814	-0.1016	3.0666
2015-11-10	19:59:00	1.3407	1.0405	0.5585	0.1519			6.1717		0.8039	-0.1016	3.2552
2015-11-10	21:59:00	1.0896	0.9147	0.4329	0.1519			4.9154		0.6151	-0.1016	3.381
2015-11-10	23:59:00	0.7757	0.7889	0.3702	0.1519			3.91		0.4263	-0.1016	3.4439
2015-11-11	01:59:00	0.5874	0.6631	0.3074	0.0891			3.2815		0.3005	-0.1016	3.4439
2015-11-11	03:59:00	0.3363	0.6002	0.3074	-0.0364			2.7787		0.2375	-0.1016	3.4439
2015-11-11	05:59:00	0.0852	0.4114	0.2446	-0.2876			2.2129		0.0487	-0.1016	3.381
2015-11-11	07:59:00	-0.166	0.2856	0.1818	-0.476			1.7728		-0.0771	-0.1016	3.3181
2015-11-11	09:59:00	-0.3543	0.1597	0.119	-0.7271			2.9044		-0.203	-0.1016	3.2552
2015-11-11	11:59:00	0.6502	0.1597	0.119	-0.9155			7.0509		-0.1401	-0.1016	3.1295
2015-11-11	13:59:00	3.2234	0.1597	0.1818	-0.9155			10.252		0.0487	-0.1016	3.0666
2015-11-11	15:59:00	4.1645	0.2227	0.2446	-0.7899			10.8166		0.1746	-0.0388	3.1924
2015-11-11	17:59:00	2.4076	0.3485	0.3074	-0.7899			8.6203		0.3634	-0.1016	3.3181
2015-11-11	19:59:00	1.4034	0.2856	0.1818	-1.0411			6.1089		0.0487	-0.0388	3.5067
2015-11-11	21:59:00	0.713	0.2227	0.119	-1.2295			4.5384		-0.1401	-0.0388	3.5696
2015-11-11	23:59:00	0.3363	0.1597	-0.0065	-1.3551			3.4701		-0.2659	-0.0388	3.6324
2015-11-12	01:59:00	0.0224	0.1597	-0.1321	-1.4807			2.7158		-0.3918	-0.0388	3.5696
2015-11-12	03:59:00	-0.166	0.0968	-0.1949	-1.5435			2.1501		-0.5177	-0.0388	3.5067
2015-11-12	05:59:00	-0.2915	0.0968	-0.2577	-1.6063			1.7728		-0.5807	-0.0388	3.4439
2015-11-12	07:59:00	-0.2915	0.0968	-0.0693	-1.5435			1.6471		-0.3918	-0.0388	3.3181
2015-11-12	09:59:00	-0.2915	0.1597	0.0563	-1.3551			3.2815		-0.2659	-0.0388	3.1924
2015-11-12	11:59:00	1.0896	0.4743	0.1818	-1.0411			7.1764		-0.0142	-0.1016	3.1295
2015-11-12	13:59:00	3.9135	0.9147	0.5585	-0.6643			10.1892		0.4263	-0.1016	3.0666
2015-11-12	15:59:00	4.9173	1.2293	0.8724	-0.476			11.0048		0.8039	-0.1016	3.1924
2015-11-12	17:59:00	3.2234	1.3551	0.9352	-0.5388			9.0597		0.9297	-0.1016	3.3181
2015-11-12	19:59:00	2.1566	1.5438	1.0607	-0.476			6.7997		0.8668	-0.1016	3.5067
2015-11-12	21:59:00	1.7173	1.6067	1.0607	-0.5388			5.6064		0.741	-0.1016	3.6324
2015-11-12	23:59:00	1.529	1.7325	1.249	-0.476			4.9154		0.8668	-0.1016	3.6953
2015-11-13	01:59:00	1.5917	1.9211	1.3118	-0.4132			4.5384		0.9927	-0.1016	3.6953
2015-11-13	03:59:00	1.7173	2.0469	1.4373	-0.3504			4.3499		1.1814	-0.1016	3.6953
2015-11-13	05:59:00	1.78	2.1098	1.3745	-0.4132			4.1614		1.1814	-0.1016	3.6953
2015-11-13	07:59:00	1.6545	1.984	1.1862	-0.4132			3.91		1.1814	-0.1016	3.6953
2015-11-13	09:59:00	1.4662	1.7953	0.9979	-0.5388			5.2923		1.0556	-0.1016	3.6324
2015-11-13	11:59:00	2.9096	1.6696	0.9352	-0.4132			9.499		1.3702	-0.1016	3.6324
2015-11-13	13:59:00	4.2272	1.9211	1.3745	-0.0364			10.5656		1.7476	-0.1016	3.6324
2015-11-13	15:59:00	4.6036	1.7325	1.249	0.0263			9.9382		1.6218	-0.1016	3.7582
2015-11-13	17:59:00	3.3489	1.418	0.8724	-0.162			7.6787		1.2443	-0.1016	3.8839
2015-11-13	19:59:00	2.2193	0.7889	0.3074	-0.6015			5.7948		0.5522	-0.1016	4.0096
2015-11-13	21:59:00	1.1524	0.3485	-0.0065	-1.1667			4.0985		-0.0142	-0.1016	4.0096
2015-11-13	23:59:00	0.6502	0.0339	-0.3205	-1.2295			3.1558		-0.2659	-0.1016	4.0096
2015-11-14	01:59:00	0.2735	-0.4695	-0.76	-1.4807			2.4644		-0.6436	-0.1016	3.9468
2015-11-14	03:59:00	-0.2915	-1.1619	-1.4507	-2.1088			1.4584		-1.3361	-0.1016	3.821
2015-11-14	05:59:00	-0.8566	-1.7284	-2.0788	-2.5485			0.6409		-1.9028	-0.1016	3.6953
2015-11-14	07:59:00	-1.5474	-2.421	-2.7697	-3.1766			-0.1768		-2.5325	-0.1016	3.5067
2015-11-14	09:59:00	-2.1755	-2.9877	-3.3351	-3.7421			-0.6172		-3.0364	-0.1016	3.381
2015-11-14	11:59:00	-1.8614	-3.4285	-3.6492	-3.9934			0.4522		-3.2884	-0.1644	3.1924
2015-11-14	13:59:00	-0.4799	-3.4915	-3.5864	-3.8677			1.8986		-3.0994	-0.1644	3.0666
2015-11-14	15:59:00	0.148	-3.4915	-3.4607	-3.8677			2.3387		-3.0994	-0.2273	2.9409
2015-11-14	17:59:00	-0.9822	-3.6175	-3.6492	-4.3075			0.9554		-3.4144	-0.2901	2.8151
2015-11-14	19:59:00	-1.673	-3.6175	-3.712	-4.3075			-0.1139		-3.5404	-0.2901	2.7522
2015-11-14	21:59:00	-1.987	-3.6805	-3.7748	-4.4332			-0.743		-3.6664	-0.3529	2.6894
2015-11-14	23:59:00	-2.1755	-3.6805	-3.8377	-4.4332			-1.1834		-3.7294	-0.4157	2.5636
2015-11-15	01:59:00	-2.3011	-3.6175	-3.712	-4.1819			-1.4351		-3.6664	-0.4785	2.4378
2015-11-15	03:59:00	-2.3011	-3.4285	-3.4607	-3.7421			-1.561		-3.4144	-0.5413	2.3121
2015-11-15	05:59:00	-1.8614	-2.8617	-2.7697	-3.051			-1.2463		-2.7845	-0.6041	2.1863
2015-11-15	07:59:00	-1.9242	-2.7358	-2.7069	-2.9882			-1.3722		-2.7845	-0.6669	2.1234
2015-11-15	09:59:00	-1.8614	-2.6099	-2.5813	-2.7997			-1.2463		-2.5955	-0.7297	1.9976
2015-11-15	11:59:00	-1.2334	-2.1061	-1.9532	-2.046			-0.743		-1.9028	-0.7925	1.9347
2015-11-15	13:59:00	-0.6683	-1.7284	-1.5763	-1.6691			-0.1768		-1.525	-0.7925	1.8718
2015-11-15	15:59:00	-0.6055	-1.6025	-1.5135	-1.6063			-0.051		-1.462	-0.7925	1.8089
2015-11-15	17:59:00	-0.6055	-1.5395	-1.4507	-1.5435			-0.1139		-1.3991	-0.8554	1.746
2015-11-15	19:59:00	-0.6683	-1.4766	-1.4507	-1.5435			-0.1768		-1.3991	-0.8554	1.746
2015-11-15	21:59:00	-0.8566	-1.5395	-1.5763	-1.7319			-0.3655		-1.525	-0.8554	1.6832
2015-11-15	23:59:00	-1.045	-1.6654	-1.702	-1.9203			-0.4913		-1.7768	-0.8554	1.6832
2015-11-16	01:59:00	-1.2962	-1.7914	-1.8276	-2.1088			-0.743		-1.9658	-0.8554	1.6203
2015-11-16	03:59:00	-1.673	-1.9173	-2.016	-2.2972			-1.1205		-2.1547	-0.8554	1.6203
2015-11-16	05:59:00	-1.987	-1.9173	-2.0788	-2.36			-1.3722		-2.2176	-0.8554	1.5574
2015-11-16	07:59:00	-2.1126	-1.9802	-2.0788	-2.36			-1.498		-2.2806	-0.8554	1.4945
2015-11-16	09:59:00	-2.2383	-2.0432	-2.2044	-2.4856			-0.6172		-2.3436	-0.8554	1.4316
2015-11-16	11:59:00	-1.2334	-1.9802	-2.0788	-2.4856			2.4015		-2.0917	-0.8554	1.4316
2015-11-16	13:59:00	0.7757	-1.6025	-1.4507	-2.1088			4.6012		-1.525	-0.8554	1.3687
2015-11-16	15:59:00	2.1566	-1.2248	-1.074	-1.7319			5.5436		-1.2102	-0.8554	1.4316
2015-11-16	17:59:00	0.9013	-1.036	-1.0112	-1.9203			3.8472		-1.2102	-0.8554	1.4945
2015-11-16	19:59:00	0.0852	-1.0989	-1.1996	-2.2344			2.0243		-1.588	-0.9182	1.5574
2015-11-16	21:59:00	-0.4799	-1.0989	-1.2624	-2.4228			1.0182		-1.7139	-0.8554	1.6203
2015-11-16	23:59:00	-0.8566	-1.0989	-1.3879	-2.5485			0.4522		-1.8398	-0.8554	1.6203
2015-11-17	01:59:00	-1.1078	-1.1619	-1.5135	-2.6741			0.0119		-1.9658	-0.8554	1.6203
2015-11-17	03:59:00	-1.1706	-1.036	-1.4507	-2.6113			-0.1768		-1.8398	-0.9182	1.5574
2015-11-17	05:59:00	-1.1706	-0.9101	-1.1996	-2.4228			-0.2397		-1.6509	-0.9182	1.5574
2015-11-17	07:59:00	-0.9822	-0.7842	-1.074	-2.2344			-0.1139		-1.462	-0.9182	1.4945
2015-11-17	09:59:00	-0.6683	-0.5954	-0.8228	-1.9203			0.0748		-1.1472	-0.9182	1.4945
2015-11-17	11:59:00	-0.166	-0.4066	-0.5088	-1.4179			0.8925		-0.7066	-0.9182	1.4316
2015-11-17	13:59:00	0.0224	-0.4066	-0.5088	-1.2295			1.0182		-0.5177	-0.9182	1.4316
2015-11-17	15:59:00	0.148	-0.3437	-0.446	-0.9783			1.2698		-0.3918	-0.9182	1.3687
2015-11-17	17:59:00	0.0852	-0.4066	-0.5088	-0.9783			1.0182		-0.5177	-0.9182	1.4316
2015-11-17	19:59:00	-0.2915	-0.5954	-0.8228	-1.3551			0.4522		-0.8954	-0.8554	1.4316
2015-11-17	21:59:00	-0.4171	-0.6583	-0.8856	-1.2923			0.2635		-0.9584	-0.8554	1.3687
2015-11-17	23:59:00	-0.4171	-0.5954	-0.76	-1.1667			0.2635		-0.8325	-0.8554	1.3687
2015-11-18	01:59:00	-0.4171	-0.5954	-0.76	-1.1667			0.2006		-0.8325	-0.8554	1.3687
2015-11-18	03:59:00	-0.3543	-0.4066	-0.5088	-0.7899			0.2006		-0.6436	-0.8554	1.3687
2015-11-18	05:59:00	-0.3543	-0.4695	-0.6344	-0.9155			0.2006		-0.7066	-0.8554	1.3058
2015-11-18	07:59:00	-1.1078	-1.036	-1.3879	-1.8575			-0.4913		-1.462	-0.7925	1.3058
2015-11-18	09:59:00	-1.5474	-1.2878	-1.6392	-2.2344			-0.051		-1.8398	-0.7925	1.3058
2015-11-18	11:59:00	-0.6055	-1.3507	-1.6392	-2.36			3.5958		-1.9658	-0.7925	1.2428
2015-11-18	13:59:00	1.7173	-1.3507	-1.5763	-2.2972			6.1717		-1.8398	-0.7925	1.2428
2015-11-18	15:59:00	2.9096	-1.2878	-1.4507	-2.2344			6.6113		-1.7139	-0.7925	1.3058
2015-11-18	17:59:00	1.1524	-1.2248	-1.3879	-2.36			4.664		-1.588	-0.7925	1.4945
2015-11-18	19:59:00	0.0852	-1.2248	-1.5135	-2.5485			2.4015		-1.8398	-0.8554	1.6203
2015-11-18	21:59:00	-0.3543	-0.973	-1.2624	-2.36			1.3327		-1.7139	-0.8554	1.6832
2015-11-18	23:59:00	-0.6055	-0.9101	-1.3251	-2.5485			0.7038		-1.7768	-0.8554	1.6832
2015-11-19	01:59:00	-0.8566	-0.9101	-1.3879	-2.6113			0.3264		-1.7768	-0.8554	1.6832
2015-11-19	03:59:00	-0.9822	-0.973	-1.5135	-2.6741			0.0748		-1.7768	-0.9182	1.6203
2015-11-19	05:59:00	-0.9822	-0.9101	-1.4507	-2.6113			-0.051		-1.7768	-0.9182	1.6203
2015-11-19	07:59:00	-1.5474	-1.3507	-1.9532	-2.9882			-0.6801		-2.2176	-0.9182	1.5574
2015-11-19	09:59:00	-1.7986	-1.6025	-2.2044	-3.1138			-0.4284		-2.3436	-0.9182	1.4945
2015-11-19	11:59:00	-0.7938	-1.4766	-1.8904	-2.6113			2.3387		-1.9658	-0.9182	1.4316
2015-11-19	13:59:00	1.2779	-1.1619	-1.3879	-1.9832			5.3551		-1.3991	-0.981	1.3687
2015-11-19	15:59:00	1.5917	-1.036	-1.1368	-1.6691			4.9782		-1.0843	-0.981	1.4316
2015-11-19	17:59:00	0.6502	-1.0989	-1.2624	-1.9203			3.91		-1.2102	-0.981	1.4945
2015-11-19	19:59:00	-0.166	-1.4766	-1.7648	-2.2344			1.9614		-1.7139	-0.981	1.6203
2015-11-19	21:59:00	-0.4171	-1.4766	-1.702	-2.046			1.144		-1.6509	-0.981	1.6832
2015-11-19	23:59:00	-0.6055	-1.4766	-1.702	-1.9203			0.7038		-1.6509	-0.981	1.6832
2015-11-20	01:59:00	-0.7311	-1.4136	-1.6392	-1.7947			0.3893		-1.588	-0.981	1.6203
2015-11-20	03:59:00	-0.7938	-1.4136	-1.5135	-1.6691			0.2006		-1.525	-1.0438	1.6203
2015-11-20	05:59:00	-0.9194	-1.4766	-1.5763	-1.7319			-0.051		-1.588	-1.0438	1.5574
2015-11-20	07:59:00	-1.045	-1.6025	-1.702	-1.7947			-0.3026		-1.7139	-1.0438	1.4945
2015-11-20	09:59:00	-1.1706	-1.6654	-1.8276	-1.9203			-0.4913		-1.7768	-0.981	1.4316
2015-11-20	11:59:00	-1.1706	-1.7284	-1.8276	-1.7947			-0.4284		-1.6509	-1.0438	1.3687
2015-11-20	13:59:00	-1.045	-1.6654	-1.702	-1.6691			-0.3655		-1.525	-1.0438	1.3687
2015-11-20	15:59:00	-1.1078	-1.6025	-1.6392	-1.6063			-0.4284		-1.525	-1.0438	1.3058
2015-11-20	17:59:00	-1.2334	-1.6654	-1.702	-1.7319			-0.6172		-1.6509	-1.0438	1.2428
2015-11-20	19:59:00	-1.2962	-1.6654	-1.7648	-1.7947			-0.743		-1.7139	-1.0438	1.1799
2015-11-20	21:59:00	-1.359	-1.7914	-1.8904	-1.9203			-0.9317		-1.8398	-1.0438	1.1799
2015-11-20	23:59:00	-1.673	-2.358	-2.6441	-2.4228			-1.1834		-2.3436	-1.0438	1.117
2015-11-21	01:59:00	-2.3011	-3.2396	-3.6492	-3.1766			-1.9386		-3.1624	-1.0438	1.117
2015-11-21	03:59:00	-2.8664	-4.2474	-4.6545	-4.1819			-2.8197		-4.0444	-1.0438	1.0541
2015-11-21	05:59:00	-3.2433	-4.8144	-5.22	-4.6846			-3.5122		-4.5485	-1.0438	0.9912
2015-11-21	07:59:00	-3.4946	-5.2554	-5.5971	-4.9359			-3.953		-4.9896	-1.0438	0.9912
2015-11-21	09:59:00	-3.5574	-5.4445	-5.7856	-5.0616			-4.1419		-5.1157	-1.1066	0.9283
2015-11-21	11:59:00	-3.1805	-5.5705	-5.8485	-4.9359			-3.953		-5.0527	-1.1694	0.8654
2015-11-21	13:59:00	-2.9292	-6.2008	-6.477	-5.313			-3.89		-5.4939	-1.2323	0.8654
2015-11-21	15:59:00	-2.9292	-6.642	-6.9799	-5.6901			-4.2678		-5.809	-1.2951	0.8025
2015-11-21	17:59:00	-2.992	-7.0833	-7.4199	-6.13			-4.8975		-6.4395	-1.3579	0.7396
2015-11-21	19:59:00	-3.1176	-7.3985	-7.7343	-6.2557			-5.3384		-6.8178	-1.4207	0.7396
2015-11-21	21:59:00	-2.9292	-7.5246	-7.9229	-5.8786			-4.8975		-6.8178	-1.4835	0.6767
2015-11-21	23:59:00	-2.6779	-8.2182	-8.1744	-6.2557			-5.5904		-7.007	-1.5464	0.6138
2015-11-22	01:59:00	-2.6151	-9.1643	-8.6774	-7.7016			-7.3545		-7.7637	-1.672	0.6138
2015-11-22	03:59:00	-2.6779	-9.4797	-8.9918	-8.2675			-7.9848		-8.2053	-1.7348	0.5508
2015-11-22	05:59:00	-2.8036	-9.732	-9.1176	-8.6448			-8.363		-8.6469	-1.8605	0.4879
2015-11-22	07:59:00	-2.9292	-9.8582	-9.1805	-8.8335			-8.5521		-9.1516	-1.9233	0.4879
2015-11-22	09:59:00	-2.992	-9.732	-9.0547	-8.8335			-7.9218		-9.2147	-2.049	0.425
2015-11-22	11:59:00	-2.9292	-9.4166	-8.8032	-8.4562			-7.0395		-8.8361	-2.1746	0.3621
2015-11-22	13:59:00	-2.8036	-8.975	-8.3002	-7.8274			-6.3464		-8.2684	-2.2375	0.3621
2015-11-22	15:59:00	-2.6779	-8.5966	-7.9858	-7.3873			-5.7794		-8.0791	-2.3631	0.2992
2015-11-22	17:59:00	-2.5523	-8.5335	-7.9858	-7.3873			-5.4014		-8.0791	-2.426	0.2362
2015-11-22	19:59:00	-2.4895	-8.5335	-8.0487	-7.3873			-5.1495		-8.1422	-2.4888	0.2362
2015-11-22	21:59:00	-2.4267	-8.6597	-8.1744	-7.5759			-5.2125		-8.3945	-2.6145	0.1733
2015-11-22	23:59:00	-2.4267	-8.7858	-8.3002	-7.7016			-5.7164		-8.5207	-2.6773	0.1104
2015-11-23	01:59:00	-2.3639	-8.7227	-8.2373	-7.7645			-6.0314		-8.5207	-2.7401	0.0475
2015-11-23	03:59:00	-2.3639	-8.7858	-8.3002	-7.8274			-6.7244		-8.6469	-2.803	0.0475
2015-11-23	05:59:00	-2.3639	-9.0381	-8.4888	-8.1418			-8.1739		-8.8361	-2.8658	-0.0154
2015-11-23	07:59:00	-2.3639	-9.2273	-8.6145	-8.3304			-9.1825		-9.0254	-2.8658	-0.0784
2015-11-23	09:59:00	-2.4267	-9.2273	-8.6774	-8.4562			-8.9303		-9.0885	-2.9287	-0.1413
2015-11-23	11:59:00	-2.4267	-9.1643	-8.6145	-8.3933			-6.4724		-9.0254	-2.9915	-0.2042
2015-11-23	13:59:00	-2.4267	-9.0381	-8.4259	-8.3933			-2.9456		-8.8361	-3.0543	-0.2042
2015-11-23	15:59:00	-2.3639	-8.8489	-8.3002	-8.3933			-1.6868		-8.6469	-3.1172	-0.2672
2015-11-23	17:59:00	-2.3639	-8.7227	-8.3002	-8.5819			-3.4493		-8.6469	-3.18	-0.3301
2015-11-23	19:59:00	-2.4267	-8.7858	-8.4888	-8.8335			-5.6534		-8.8992	-3.2429	-0.3301
2015-11-23	21:59:00	-2.4895	-8.8489	-8.6774	-9.0221			-7.1655		-9.0885	-3.3057	-0.3301
2015-11-23	23:59:00	-2.6151	-8.912	-8.8032	-9.2108			-8.426		-9.404	-3.3057	-0.3301
2015-11-24	01:59:00	-2.7408	-8.912	-8.929	-9.3366			-9.3086		-9.5933	-3.3686	-0.3301
2015-11-24	03:59:00	-2.8036	-9.0381	-9.0547	-9.4623			-9.8761		-9.6564	-3.4314	-0.393
2015-11-24	05:59:00	-2.8664	-9.2904	-9.1805	-9.651			-10.4437		-9.7195	-3.4943	-0.4559
2015-11-24	07:59:00	-2.9292	-9.4797	-9.3063	-9.7139			-10.759		-9.7826	-3.5571	-0.4559
2015-11-24	09:59:00	-2.992	-9.6689	-9.4321	-9.7768			-9.5608		-9.8457	-3.5571	-0.5189
2015-11-24	11:59:00	-3.0548	-9.6689	-9.4321	-9.7139			-4.8975		-9.7195	-3.6199	-0.5818
2015-11-24	13:59:00	-2.992	-9.732	-9.4949	-9.651			-1.9386		-9.5302	-3.6828	-0.6448
2015-11-24	15:59:00	-2.8664	-9.8582	-9.6207	-9.7139			-1.8756		-9.5302	-3.7456	-0.7077
2015-11-24	17:59:00	-2.8664	-9.9844	-9.9352	-9.9026			-4.3937		-9.5933	-3.8085	-0.7077
2015-11-24	19:59:00	-2.8664	-10.0475	-10.1239	-9.9655			-6.5354		-9.7195	-3.8713	-0.7706
2015-11-24	21:59:00	-2.9292	-10.1105	-10.1868	-10.0284			-7.6066		-9.7195	-3.9342	-0.7706
2015-11-24	23:59:00	-3.1176	-9.9213	-9.9981	-9.8397			-7.9848		-9.5302	-3.9971	-0.7706
2015-11-25	01:59:00	-3.5574	-9.4166	-9.3692	-9.3366			-7.8587		-9.0885	-4.0599	-0.7706
2015-11-25	03:59:00	-3.683	-8.6597	-8.5517	-8.7077			-7.4176		-8.5207	-4.0599	-0.8336
2015-11-25	05:59:00	-3.9972	-8.4074	-8.3002	-8.519			-7.1655		-8.2684	-4.1228	-0.8336
2015-11-25	07:59:00	-4.437	-8.2182	-8.1744	-8.3933			-7.1025		-8.0791	-4.1856	-0.8965
2015-11-25	09:59:00	-4.7512	-8.2813	-8.2373	-8.3933			-7.1025		-8.1422	-4.1856	-0.9594
2015-11-25	11:59:00	-4.7512	-8.1551	-8.0487	-8.0789			-6.5984		-7.7637	-4.2485	-0.9594
2015-11-25	13:59:00	-4.7512	-8.1551	-7.9858	-7.9531			-6.3464		-7.5745	-4.2485	-1.0224
2015-11-25	15:59:00	-4.6883	-8.1551	-8.0487	-7.8903			-6.4724		-7.5745	-4.2485	-1.0224
2015-11-25	17:59:00	-4.8769	-8.3443	-8.363	-8.1418			-6.7874		-7.8268	-4.2485	-1.0853
2015-11-25	19:59:00	-5.1282	-8.5966	-8.7403	-8.4562			-7.2915		-8.1422	-4.2485	-1.0853
2015-11-25	21:59:00	-4.7512	-8.5335	-8.7403	-8.1418			-7.0395		-8.0791	-4.2485	-1.1483
2015-11-25	23:59:00	-4.437	-8.4705	-8.7403	-8.016			-6.7244		-8.0791	-4.3113	-1.1483
2015-11-26	01:59:00	-4.1857	-8.4074	-8.6145	-7.8903			-6.5984		-8.0791	-4.3113	-1.2112
2015-11-26	03:59:00	-4.06	-8.2182	-8.2373	-7.7645			-6.3464		-7.8268	-4.3113	-1.2112
2015-11-26	05:59:00	-3.8715	-8.029	-7.9858	-7.7016			-6.1574		-7.7007	-4.3113	-1.2112
2015-11-26	07:59:00	-3.7459	-7.9029	-7.7972	-7.5759			-5.9684		-7.6376	-4.3113	-1.2742
2015-11-26	09:59:00	-3.683	-7.7137	-7.6714	-7.513			-5.7794		-7.5115	-4.3113	-1.2742
2015-11-26	11:59:00	-3.5574	-7.5876	-7.4199	-7.3873			-5.6534		-7.4484	-4.3113	-1.2742
2015-11-26	13:59:00	-3.4946	-7.3985	-7.2313	-7.3244			-5.4644		-7.3223	-4.3113	-1.2742
2015-11-26	15:59:00	-3.3689	-7.2093	-7.0428	-7.1987			-5.2755		-7.2592	-4.3113	-1.3371
2015-11-26	17:59:00	-3.3061	-7.0833	-6.917	-7.1987			-5.1495		-7.1331	-4.3113	-1.2742
2015-11-26	19:59:00	-3.2433	-6.9572	-6.7913	-7.1987			-5.0865		-7.007	-4.3113	-1.3371
2015-11-26	21:59:00	-3.1805	-6.8311	-6.7285	-7.1358			-4.9605		-6.9439	-4.3113	-1.3371
2015-11-26	23:59:00	-3.1176	-6.705	-6.6656	-7.1358			-4.8346		-6.8178	-4.3113	-1.2742
2015-11-27	01:59:00	-3.1176	-6.642	-6.5399	-7.1358			-4.7716		-6.6917	-4.3113	-1.2742
2015-11-27	03:59:00	-3.0548	-6.5159	-6.477	-7.1358			-4.7086		-6.6286	-4.2485	-1.2742
2015-11-27	05:59:00	-2.992	-6.4529	-6.4142	-7.1987			-4.7716		-6.6286	-4.2485	-1.2742
2015-11-27	07:59:00	-2.992	-6.3898	-6.3513	-7.2615			-6.3464		-6.5656	-4.2485	-1.2742
2015-11-27	09:59:00	-2.9292	-6.3268	-6.2885	-7.2615			-6.6614		-6.5656	-4.2485	-1.2742
2015-11-27	11:59:00	-2.9292	-6.2638	-6.2256	-7.1987			-3.827		-6.5656	-4.2485	-1.2742
2015-11-27	13:59:00	-2.8664	-6.2008	-6.1627	-7.1358			-1.7498		-6.5656	-4.1856	-1.2742
2015-11-27	15:59:00	-2.8664	-6.0747	-6.0999	-7.0729			-1.6868		-6.5656	-4.1856	-1.2742
2015-11-27	17:59:00	-2.8036	-6.0117	-6.037	-7.0101			-2.9456		-6.5656	-4.1856	-1.2112
2015-11-27	19:59:00	-2.8036	-5.9487	-5.9742	-7.0729			-4.7716		-6.6917	-4.1228	-1.2112
2015-11-27	21:59:00	-2.8036	-5.9487	-5.9742	-7.0729			-5.9054		-6.7547	-4.1228	-1.2112
2015-11-27	23:59:00	-2.7408	-5.8856	-5.9113	-7.1358			-6.5354		-6.8808	-4.1228	-1.2112
2015-11-28	01:59:00	-2.7408	-5.8226	-5.9113	-7.1358			-7.1025		-6.9439	-4.1228	-1.2112
2015-11-28	03:59:00	-2.6779	-5.8226	-5.8485	-7.1358			-7.6697		-7.007	-4.0599	-1.2112
2015-11-28	05:59:00	-2.6779	-5.8856	-5.8485	-7.1987			-8.363		-7.07	-4.0599	-1.2112
2015-11-28	07:59:00	-2.6779	-7.2093	-6.9799	-7.3873			-8.9934		-7.07	-4.0599	-1.2112
2015-11-28	09:59:00	-2.6151	-7.9029	-7.7343	-8.016			-8.6782		-7.3223	-4.0599	-1.1483
2015-11-28	11:59:00	-2.6151	-7.3985	-7.2313	-7.5759			-7.7327		-7.1961	-3.9971	-1.1483
2015-11-28	13:59:00	-2.5523	-7.7137	-7.6086	-7.8274			-7.6066		-7.1961	-4.0599	-1.1483
2015-11-28	15:59:00	-2.5523	-7.9029	-7.7343	-7.8903			-7.4176		-7.1961	-4.0599	-1.1483
2015-11-28	17:59:00	-2.5523	-8.3443	-8.1744	-8.2675			-7.9218		-7.3223	-4.0599	-1.1483
2015-11-28	19:59:00	-2.4895	-8.8489	-8.8032	-8.8335			-8.7412		-7.5115	-4.0599	-1.1483
2015-11-28	21:59:00	-2.4895	-9.3535	-9.3063	-9.3994			-9.4347		-7.7637	-4.0599	-1.1483
2015-11-28	23:59:00	-2.4895	-9.8582	-9.8723	-9.9655			-10.2545		-8.016	-4.0599	-1.1483
2015-11-29	01:59:00	-2.4895	-10.1736	-10.3126	-10.5316			-10.6329		-8.2053	-4.1228	-1.1483
2015-11-29	03:59:00	-2.4267	-10.2998	-10.4384	-10.8461			-10.8221		-8.3945	-4.1856	-1.1483
2015-11-29	05:59:00	-2.4267	-10.2998	-10.4384	-10.8461			-10.696		-8.6469	-4.1856	-1.1483
2015-11-29	07:59:00	-2.4267	-10.1736	-10.3126	-10.7203			-10.5698		-8.8361	-4.2485	-1.1483
2015-11-29	09:59:00	-2.4895	-9.4797	-9.4949	-9.8397			-9.8131		-8.5838	-4.3113	-1.2112
2015-11-29	11:59:00	-2.5523	-8.6597	-8.4888	-8.7706			-8.7412		-8.016	-4.3742	-1.2112
2015-11-29	13:59:00	-2.5523	-7.9029	-7.6714	-7.8903			-7.6066		-7.4484	-4.437	-1.2742
2015-11-29	15:59:00	-2.5523	-7.5246	-7.2942	-7.5759			-7.1025		-7.1331	-4.4999	-1.3371
2015-11-29	17:59:00	-2.5523	-7.2724	-7.1056	-7.4501			-7.0395		-7.007	-4.4999	-1.4001
2015-11-29	19:59:00	-2.5523	-7.0833	-6.917	-7.2615			-6.8504		-6.8178	-4.4999	-1.4001
2015-11-29	21:59:00	-2.6151	-7.0202	-6.917	-7.3244			-6.8504		-6.7547	-4.4999	-1.463
2015-11-29	23:59:00	-2.6151	-7.0202	-6.917	-7.3244			-6.8504		-6.6917	-4.4999	-1.463
2015-11-30	01:59:00	-2.6151	-6.8941	-6.8542	-7.1987			-6.7874		-6.5656	-4.4999	-1.526
2015-11-30	03:59:00	-2.7408	-6.8941	-6.8542	-7.1987			-6.7874		-6.5656	-4.4999	-1.526
2015-11-30	05:59:00	-3.0548	-6.8941	-6.8542	-7.1987			-6.7874		-6.5656	-4.4999	-1.526
2015-11-30	07:59:00	-3.1805	-6.8311	-6.7913	-7.1358			-6.7244		-6.5656	-4.4999	-1.5889
2015-11-30	09:59:00	-3.3061	-6.7681	-6.7285	-7.0101			-6.6614		-6.4395	-4.4999	-1.5889
2015-11-30	11:59:00	-3.2433	-6.5159	-6.4142	-6.6958			-6.2834		-6.1242	-4.4999	-1.6519
2015-11-30	13:59:00	-3.1805	-6.3268	-6.1627	-6.4443			-5.9684		-5.8721	-4.4999	-1.6519
2015-11-30	15:59:00	-3.2433	-6.3898	-6.2256	-6.6329			-6.0314		-5.9981	-4.437	-1.7148
2015-11-30	17:59:00	-3.3689	-6.642	-6.5399	-6.9472			-6.3464		-6.2503	-4.437	-1.7148
2015-11-30	19:59:00	-3.5574	-6.7681	-6.7913	-7.1987			-6.7874		-6.4395	-4.437	-1.7148
2015-11-30	21:59:00	-3.683	-6.705	-6.7285	-7.1358			-6.9134		-6.3764	-4.3742	-1.7778
2015-11-30	23:59:00	-3.8715	-6.4529	-6.5399	-6.7586			-6.7874		-6.1873	-4.3742	-1.7778
2015-12-01	01:59:00	-3.9972	-6.3268	-6.3513	-6.6958			-6.5354		-6.1873	-4.3742	-1.7778
2015-12-01	03:59:00	-3.9972	-6.0117	-5.9742	-6.13			-6.2204		-5.8721	-4.3742	-1.8407
2015-12-01	05:59:00	-3.683	-5.1294	-4.9058	-5.0616			-5.3384		-4.9266	-4.3742	-1.8407
2015-12-01	07:59:00	-3.4946	-4.8774	-4.6545	-4.8731			-4.8975		-4.7375	-4.3742	-1.9037
2015-12-01	09:59:00	-3.4318	-4.8774	-4.7173	-4.9359			-4.7716		-4.7375	-4.3113	-1.9037
2015-12-01	11:59:00	-3.3061	-4.7514	-4.5916	-4.7474			-4.5197		-4.5485	-4.3113	-1.9037
2015-12-01	13:59:00	-3.1805	-4.5624	-4.3403	-4.5589			-4.2048		-4.2964	-4.3113	-1.9666
2015-12-01	15:59:00	-3.0548	-4.3104	-4.089	-4.3075			-3.89		-4.1074	-4.2485	-1.9666
2015-12-01	17:59:00	-2.9292	-4.1214	-3.9005	-4.1819			-3.7641		-3.9184	-4.1856	-1.9037
2015-12-01	19:59:00	-2.8036	-3.9324	-3.7748	-4.119			-3.6381		-3.8554	-4.1228	-1.9037
2015-12-01	21:59:00	-2.7408	-3.8694	-3.712	-3.9934			-3.5752		-3.7294	-4.1228	-1.9037
2015-12-01	23:59:00	-2.6151	-3.7435	-3.5235	-3.8677			-3.4493		-3.6034	-4.0599	-1.9037
2015-12-02	01:59:00	-2.6151	-3.7435	-3.5864	-3.9305			-3.4493		-3.6034	-3.9971	-1.8407
2015-12-02	03:59:00	-2.7408	-3.8694	-3.7748	-4.1819			-3.7641		-3.9184	-3.9342	-1.8407
2015-12-02	05:59:00	-2.8664	-3.9324	-3.9005	-4.3704			-4.0789		-4.0444	-3.9342	-1.8407
2015-12-02	07:59:00	-2.992	-3.9954	-4.0261	-4.4332			-4.2678		-4.1704	-3.8713	-1.7778
2015-12-02	09:59:00	-3.1176	-4.3104	-4.466	-4.9988			-4.3308		-4.6115	-3.8085	-1.7778
2015-12-02	11:59:00	-3.1805	-4.7514	-4.9687	-5.3758			-3.0715		-4.9896	-3.8085	-1.7778
2015-12-02	13:59:00	-2.6779	-4.9404	-5.0943	-5.4387			-2.1274		-5.0527	-3.7456	-1.7778
2015-12-02	15:59:00	-2.3639	-5.0034	-5.1572	-5.5644			-2.0644		-5.1157	-3.7456	-1.7778
2015-12-02	17:59:00	-2.6779	-5.1294	-5.3457	-5.8158			-3.0715		-5.3048	-3.7456	-1.7148
2015-12-02	19:59:00	-3.1176	-5.2554	-5.5343	-6.13			-4.1419		-5.5569	-3.7456	-1.7148
2015-12-02	21:59:00	-3.3061	-5.1294	-5.4714	-6.0672			-4.7086		-5.5569	-3.7456	-1.6519
2015-12-02	23:59:00	-3.4946	-5.0034	-5.4086	-6.13			-5.0865		-5.6199	-3.7456	-1.6519
2015-12-03	01:59:00	-3.683	-4.9404	-5.4086	-6.2557			-5.4644		-5.746	-3.7456	-1.5889
2015-12-03	03:59:00	-3.8715	-4.9404	-5.4086	-6.3815			-5.7794		-5.809	-3.7456	-1.6519
2015-12-03	05:59:00	-4.06	-4.9404	-5.3457	-6.3815			-6.0944		-5.8721	-3.7456	-1.6519
2015-12-03	07:59:00	-4.2485	-4.8144	-5.22	-6.3186			-6.3464		-5.809	-3.7456	-1.6519
2015-12-03	09:59:00	-4.3113	-4.6254	-4.9058	-6.0043			-6.0314		-5.683	-3.7456	-1.7148
2015-12-03	11:59:00	-4.1857	-4.1844	-4.4031	-5.5644			-3.4493		-5.3048	-3.7456	-1.7778
2015-12-03	13:59:00	-3.2433	-3.8064	-3.8377	-5.0616			-0.9947		-4.8636	-3.8085	-1.7778
2015-12-03	15:59:00	-2.4267	-3.3026	-3.2094	-4.496			1.0182		-4.3594	-3.8085	-1.8407
2015-12-03	17:59:00	-2.6779	-3.1766	-3.1466	-4.5589			0.0748		-4.2334	-3.7456	-1.7778
2015-12-03	19:59:00	-3.1176	-3.1136	-3.2723	-4.6846			-1.1205		-4.2964	-3.7456	-1.7148
2015-12-03	21:59:00	-3.4318	-3.1136	-3.3351	-4.8102			-2.1274		-4.4225	-3.7456	-1.6519
2015-12-03	23:59:00	-3.6202	-3.1136	-3.3979	-4.8731			-2.7568		-4.3594	-3.6828	-1.526
2015-12-04	01:59:00	-3.7459	-2.9247	-3.2723	-4.6217			-2.9456		-4.1704	-3.6828	-1.526
2015-12-04	03:59:00	-3.8087	-2.6099	-2.9582	-4.4332			-3.0086		-4.0444	-3.6828	-1.463
2015-12-04	05:59:00	-3.8715	-2.7358	-3.1466	-4.8102			-3.3233		-4.2334	-3.6199	-1.463
2015-12-04	07:59:00	-3.9972	-2.9247	-3.4607	-5.0616			-3.7011		-4.4225	-3.6199	-1.463
2015-12-04	09:59:00	-4.1228	-2.9877	-3.5235	-4.9988			-3.0086		-4.4225	-3.6199	-1.463
2015-12-04	11:59:00	-3.9344	-2.7988	-3.2094	-4.5589			-0.2397		-4.1074	-3.5571	-1.463
2015-12-04	13:59:00	-3.1176	-2.7358	-3.021	-4.1819			1.8986		-3.7294	-3.5571	-1.463
2015-12-04	15:59:00	-2.9292	-2.9247	-3.0838	-4.0562			1.0182		-3.6664	-3.5571	-1.463
2015-12-04	17:59:00	-3.0548	-3.1136	-3.2723	-4.119			-0.1768		-3.7294	-3.4943	-1.4001
2015-12-04	19:59:00	-3.2433	-3.3026	-3.5235	-4.2447			-1.1205		-3.9184	-3.4943	-1.3371
2015-12-04	21:59:00	-3.1805	-3.5545	-3.7748	-4.3075			-1.9386		-3.9814	-3.4943	-1.3371
2015-12-04	23:59:00	-3.1176	-3.7435	-3.9633	-4.3704			-2.4421		-4.1074	-3.4943	-1.2742
2015-12-05	01:59:00	-3.0548	-3.8064	-4.0261	-4.3704			-2.6309		-4.1074	-3.4314	-1.2742
2015-12-05	03:59:00	-2.992	-3.8064	-3.9633	-4.3704			-2.7568		-4.0444	-3.4314	-1.2742
2015-12-05	05:59:00	-2.992	-3.9954	-4.2146	-4.6217			-3.0086		-4.2964	-3.4314	-1.2742
2015-12-05	07:59:00	-3.1176	-4.1844	-4.466	-4.8731			-3.4493		-4.4855	-3.4314	-1.2742
2015-12-05	09:59:00	-3.2433	-4.4364	-4.7173	-4.9988			-3.4493		-4.6745	-3.4314	-1.2742
2015-12-05	11:59:00	-3.1176	-4.4994	-4.7173	-5.0616			-0.6801		-4.6115	-3.4314	-1.2742
2015-12-05	13:59:00	-2.4267	-4.3734	-4.4031	-4.9359			3.093		-4.4225	-3.4314	-1.2742
2015-12-05	15:59:00	-1.9242	-4.2474	-4.1518	-4.8731			4.1614		-4.2334	-3.4314	-1.2742
2015-12-05	17:59:00	-2.2383	-4.1214	-4.0261	-4.8731			1.9614		-4.1074	-3.4314	-1.2112
2015-12-05	19:59:00	-2.5523	-4.1214	-4.2146	-5.0616			0.1377		-4.3594	-3.4314	-1.1483
2015-12-05	21:59:00	-2.7408	-4.0584	-4.2775	-5.0616			-0.9317		-4.3594	-3.4314	-1.0224
2015-12-05	23:59:00	-2.8036	-3.6805	-3.8377	-4.8102			-1.561		-4.1074	-3.4314	-0.9594
2015-12-06	01:59:00	-2.8664	-3.3655	-3.5235	-4.6846			-2.0015		-3.9814	-3.4314	-0.9594
2015-12-06	03:59:00	-2.8664	-3.3026	-3.5235	-4.6846			-2.3791		-3.9814	-3.4314	-0.8965
2015-12-06	05:59:00	-2.9292	-3.3026	-3.5235	-4.7474			-2.6938		-3.9814	-3.3686	-0.8965
2015-12-06	07:59:00	-3.0548	-3.5545	-3.9005	-4.9359			-3.0086		-4.0444	-3.3686	-0.8965
2015-12-06	09:59:00	-3.0548	-3.6175	-3.9005	-4.9359			-2.0644		-3.9184	-3.3686	-0.9594
2015-12-06	11:59:00	-2.8664	-3.4285	-3.5864	-4.6846			1.7099		-3.7294	-3.3686	-0.9594
2015-12-06	13:59:00	-1.987	-3.2396	-3.2094	-4.496			5.041		-3.4774	-3.3686	-0.9594
2015-12-06	15:59:00	-1.4218	-3.1136	-3.021	-4.3704			5.4807		-3.2254	-3.3686	-0.9594
2015-12-06	17:59:00	-1.7986	-3.1766	-3.0838	-4.4332			3.4072		-3.3514	-3.3057	-0.8965
2015-12-06	19:59:00	-2.2383	-3.5545	-3.712	-4.8731			0.9554		-3.8554	-3.3057	-0.7706
2015-12-06	21:59:00	-2.5523	-3.9954	-4.2775	-5.1244			-0.4913		-4.2334	-3.3057	-0.7077
2015-12-06	23:59:00	-2.8036	-4.3734	-4.7173	-5.3758			-1.8127		-4.6115	-3.3057	-0.6448
2015-12-07	01:59:00	-3.0548	-4.6254	-4.9687	-5.5644			-2.6938		-4.8636	-3.3057	-0.5818
2015-12-07	03:59:00	-3.2433	-4.7514	-5.1572	-5.8158			-3.3233		-5.0527	-3.3057	-0.5818
2015-12-07	05:59:00	-3.4318	-4.9404	-5.3457	-5.9415			-3.827		-5.2417	-3.3057	-0.5818
2015-12-07	07:59:00	-3.5574	-5.0664	-5.5343	-6.13			-4.2678		-5.4308	-3.3057	-0.6448
2015-12-07	09:59:00	-3.7459	-5.1924	-5.7228	-6.2557			-3.7641		-5.4308	-3.3686	-0.7077
2015-12-07	11:59:00	-3.4318	-5.0664	-5.4086	-5.9415			0.0748		-4.9896	-3.3686	-0.7706
2015-12-07	13:59:00	-2.3639	-4.8144	-4.9687	-5.6272			2.9673		-4.6745	-3.3686	-0.8336
2015-12-07	15:59:00	-1.673	-4.4994	-4.466	-5.3758			3.7843		-4.2334	-3.4314	-0.8336
2015-12-07	17:59:00	-2.1126	-4.4994	-4.466	-5.5015			1.9614		-4.2964	-3.4314	-0.7706
2015-12-07	19:59:00	-2.5523	-4.5624	-4.6545	-5.5644			0.2635		-4.1704	-3.4314	-0.6448
2015-12-07	21:59:00	-2.8664	-4.6884	-4.9058	-5.6901			-0.6172		-4.1704	-3.4314	-0.5818
2015-12-07	23:59:00	-3.1176	-4.8144	-5.0943	-6.0043			-1.3722		-4.5485	-3.4314	-0.5189
2015-12-08	01:59:00	-3.3061	-4.9404	-5.22	-6.0043			-1.8756		-4.4855	-3.4314	-0.5189
2015-12-08	03:59:00	-3.4946	-5.0034	-5.2829	-6.0672			-2.1903		-4.4855	-3.4943	-0.4559
2015-12-08	05:59:00	-3.6202	-5.0034	-5.2829	-6.0043			-2.1903		-4.4855	-3.4943	-0.5189
2015-12-08	07:59:00	-3.5574	-4.9404	-5.1572	-5.9415			-2.2532		-4.4855	-3.4943	-0.5189
2015-12-08	09:59:00	-3.683	-4.9404	-5.1572	-5.8786			-1.9386		-4.3594	-3.5571	-0.5818
2015-12-08	11:59:00	-3.3689	-4.7514	-4.9058	-5.7529			1.7099		-4.2334	-3.5571	-0.5818
2015-12-08	13:59:00	-2.6151	-4.4994	-4.5288	-5.3758			2.9673		-3.9814	-3.5571	-0.6448
2015-12-08	15:59:00	-1.7986	-3.9954	-3.7748	-4.7474			4.1614		-3.4144	-3.5571	-0.5818
2015-12-08	17:59:00	-2.1755	-4.0584	-3.9633	-5.0616			2.2758		-3.7294	-3.5571	-0.5189
2015-12-08	19:59:00	-2.6779	-4.3734	-4.5288	-5.6272			0.5151		-4.2964	-3.5571	-0.4559
2015-12-08	21:59:00	-3.1805	-4.9404	-5.2829	-6.13			-0.9947		-4.9266	-3.5571	-0.393
2015-12-08	23:59:00	-3.4946	-5.3815	-5.7856	-6.4443			-2.1274		-5.3678	-3.5571	-0.3301
2015-12-09	01:59:00	-3.683	-5.5705	-6.037	-6.5072			-2.8827		-5.5569	-3.5571	-0.3301
2015-12-09	03:59:00	-3.6202	-5.5705	-5.8485	-6.13			-3.1974		-5.4308	-3.5571	-0.393
2015-12-09	05:59:00	-3.6202	-5.5705	-5.7856	-6.0672			-3.5122		-5.4939	-3.5571	-0.4559
2015-12-09	07:59:00	-3.5574	-5.5075	-5.6599	-5.8786			-3.5122		-5.4308	-3.6199	-0.5189
2015-12-09	09:59:00	-3.4318	-5.3815	-5.4714	-5.6901			-3.5122		-5.2417	-3.6199	-0.5818
2015-12-09	11:59:00	-3.3061	-5.2554	-5.22	-5.4387			-3.3233		-4.9896	-3.6828	-0.6448
2015-12-09	13:59:00	-3.1805	-5.5075	-5.5343	-5.4387			-3.2604		-5.1157	-3.6828	-0.7077
2015-12-09	15:59:00	-3.1176	-5.9487	-6.037	-5.5015			-3.6381		-5.4308	-3.6828	-0.7706
2015-12-09	17:59:00	-3.1805	-6.3268	-6.477	-5.6272			-4.0789		-5.746	-3.6828	-0.8336
2015-12-09	19:59:00	-3.1805	-6.705	-6.917	-5.8786			-4.5827		-6.1242	-3.6828	-0.8336
2015-12-09	21:59:00	-3.3061	-7.1463	-7.5457	-6.2557			-5.2125		-6.6286	-3.7456	-0.8965
2015-12-09	23:59:00	-3.4946	-7.6507	-8.1744	-6.7586			-6.2204		-7.1961	-3.7456	-0.9594
2015-12-10	01:59:00	-3.683	-8.029	-8.6774	-7.1358			-6.9765		-7.6376	-3.8085	-0.9594
2015-12-10	03:59:00	-3.8715	-8.2813	-9.0547	-7.513			-7.6066		-8.016	-3.8085	-1.0224
2015-12-10	05:59:00	-3.9972	-8.4074	-9.2434	-7.8274			-7.9848		-8.2684	-3.8713	-1.0853
2015-12-10	07:59:00	-4.1228	-8.5335	-9.4321	-8.0789			-8.2369		-8.5207	-3.9342	-1.0853
2015-12-10	09:59:00	-4.2485	-8.5966	-9.4321	-8.2046			-7.6697		-8.5838	-3.9971	-1.1483
2015-12-10	11:59:00	-4.2485	-8.4074	-9.1176	-8.2046			-3.3863		-8.3314	-4.0599	-1.2112
2015-12-10	13:59:00	-3.8087	-8.029	-8.4888	-8.1418			0.2635		-7.8899	-4.1228	-1.2742
2015-12-10	15:59:00	-3.3689	-7.7137	-7.86	-8.016			1.7099		-7.4484	-4.2485	-1.3371
2015-12-10	17:59:00	-3.4946	-7.5246	-7.6714	-7.9531			0.1377		-7.3853	-4.3113	-1.3371
2015-12-10	19:59:00	-3.7459	-7.3985	-7.5457	-8.016			-1.8756		-7.5115	-4.3113	-1.3371
2015-12-10	21:59:00	-3.8715	-7.0202	-7.1685	-7.9531			-3.3233		-7.4484	-4.3742	-1.3371
2015-12-10	23:59:00	-3.9344	-6.5789	-6.6656	-7.8274			-4.1419		-7.2592	-4.3742	-1.3371
2015-12-11	01:59:00	-4.06	-6.2008	-6.2885	-7.5759			-4.5827		-7.1331	-4.437	-1.2742
2015-12-11	03:59:00	-4.1228	-5.8856	-5.9742	-7.3244			-4.9605		-7.007	-4.437	-1.3371
2015-12-11	05:59:00	-4.1857	-5.6966	-5.8485	-7.1987			-5.2125		-7.007	-4.437	-1.3371
2015-12-11	07:59:00	-4.2485	-5.5075	-5.6599	-7.0729			-5.3384		-6.9439	-4.437	-1.3371
2015-12-11	09:59:00	-4.3113	-5.3815	-5.5343	-6.9472			-4.6456		-6.7547	-4.437	-1.4001
2015-12-11	11:59:00	-4.2485	-4.8774	-4.9687	-6.4443			-1.8756		-6.2503	-4.437	-1.463
2015-12-11	13:59:00	-3.7459	-4.4364	-4.4031	-6.0043			0.0748		-5.5569	-4.437	-1.463
2015-12-11	15:59:00	-3.4318	-4.2474	-4.2146	-5.7529			0.3893		-5.2417	-4.437	-1.526
2015-12-11	17:59:00	-3.9344	-4.4364	-4.5288	-5.9415			-0.9947		-5.4308	-4.437	-1.526
2015-12-11	19:59:00	-4.3113	-4.6254	-4.7801	-5.9415			-2.3791		-5.5569	-4.3742	-1.526
2015-12-11	21:59:00	-4.6255	-4.6254	-4.9058	-6.0043			-3.2604		-5.6199	-4.3742	-1.526
2015-12-11	23:59:00	-4.8769	-4.6884	-4.9687	-6.0043			-3.827		-5.683	-4.3113	-1.526
2015-12-12	01:59:00	-5.0025	-4.8144	-5.0943	-6.13			-4.3937		-5.746	-4.3113	-1.526
2015-12-12	03:59:00	-5.1911	-5.0664	-5.4086	-6.3186			-4.8346		-5.9981	-4.3113	-1.5889
2015-12-12	05:59:00	-5.4424	-5.2554	-5.6599	-6.5072			-5.2755		-6.1873	-4.3113	-1.5889
2015-12-12	07:59:00	-5.5053	-5.5075	-5.8485	-6.57			-5.4644		-6.2503	-4.2485	-1.6519
2015-12-12	09:59:00	-5.6938	-5.6335	-5.9113	-6.6329			-5.6534		-6.3764	-4.3113	-1.7148
2015-12-12	11:59:00	-5.3167	-5.5705	-5.7856	-6.5072			-2.8827		-6.2503	-4.3113	-1.7148
2015-12-12	13:59:00	-4.3113	-5.3185	-5.4086	-6.1929			-0.9317		-5.9351	-4.3113	-1.7778
2015-12-12	15:59:00	-3.9972	-5.0034	-5.0943	-5.9415			-0.743		-5.6199	-4.3113	-1.8407
2015-12-12	17:59:00	-4.3113	-4.7514	-4.843	-5.6901			-1.9386		-5.3678	-4.3113	-1.8407
2015-12-12	19:59:00	-4.6255	-4.5624	-4.6545	-5.5644			-2.8827		-5.2417	-4.3113	-1.8407
2015-12-12	21:59:00	-4.7512	-4.3104	-4.466	-5.5015			-3.3233		-5.1787	-4.3113	-1.7778
2015-12-12	23:59:00	-4.7512	-4.0584	-4.2775	-5.3758			-3.5752		-5.0527	-4.3113	-1.8407
2015-12-13	01:59:00	-4.8769	-3.9954	-4.2775	-5.3758			-3.89		-5.0527	-4.2485	-1.8407
2015-12-13	03:59:00	-5.0025	-3.9954	-4.2775	-5.4387			-4.1419		-5.0527	-4.2485	-1.8407
2015-12-13	05:59:00	-5.1911	-3.9954	-4.2775	-5.3758			-4.2678		-5.0527	-4.2485	-1.8407
2015-12-13	07:59:00	-5.5053	-4.1214	-4.5288	-5.5644			-4.6456		-5.2417	-4.1856	-1.9037
2015-12-13	09:59:00	-5.7567	-4.3734	-4.7801	-5.7529			-4.2678		-5.4308	-4.1856	-1.9037
2015-12-13	11:59:00	-5.0025	-4.4994	-4.9058	-5.8786			-1.0576		-5.4939	-4.1856	-1.9666
2015-12-13	13:59:00	-2.6151	-4.5624	-4.843	-5.8158			2.0243		-5.3678	-4.1856	-1.9666
2015-12-13	15:59:00	-2.1126	-4.6254	-4.7801	-5.6901			2.4644		-5.2417	-4.1856	-1.9666
2015-12-13	17:59:00	-3.5574	-4.8144	-5.1572	-6.13			0.1377		-5.5569	-4.1856	-1.9037
2015-12-13	19:59:00	-4.437	-5.0664	-5.5343	-6.5072			-1.498		-5.9351	-4.1856	-1.8407
2015-12-13	21:59:00	-5.0025	-5.1924	-5.7856	-6.7586			-2.7568		-6.1873	-4.1856	-1.7778
2015-12-13	23:59:00	-5.3796	-5.3185	-5.9742	-7.0101			-3.6381		-6.3134	-4.1856	-1.7148
2015-12-14	01:59:00	-5.5681	-5.4445	-6.1627	-7.1358			-4.2048		-6.3134	-4.1856	-1.7148
2015-12-14	03:59:00	-5.6938	-5.5705	-6.3513	-7.2615			-4.6456		-6.3764	-4.1856	-1.7148
2015-12-14	05:59:00	-5.7567	-5.6966	-6.477	-7.3244			-5.0235		-6.3764	-4.2485	-1.7148
2015-12-14	07:59:00	-5.9452	-5.6966	-6.4142	-7.3244			-5.4014		-6.4395	-4.2485	-1.7778
2015-12-14	09:59:00	-6.0081	-5.7596	-6.5399	-7.4501			-5.0235		-6.4395	-4.3113	-1.7778
2015-12-14	11:59:00	-4.9397	-5.6966	-6.2885	-7.1358			-0.8688		-5.9981	-4.3113	-1.8407
2015-12-14	13:59:00	-2.1755	-5.4445	-5.7856	-6.6329			3.1558		-5.5569	-4.3742	-1.9037
2015-12-14	15:59:00	-1.359	-5.0664	-5.1572	-6.0043			4.0357		-5.1157	-4.3742	-1.9037
2015-12-14	17:59:00	-2.5523	-5.0034	-5.0943	-6.13			2.2129		-5.3048	-4.3742	-1.8407
2015-12-14	19:59:00	-3.683	-5.1294	-5.4714	-6.6329			0.1377		-5.746	-4.3742	-1.7148
2015-12-14	21:59:00	-4.3113	-5.2554	-5.7228	-6.8215			-1.1205		-5.9351	-4.3742	-1.5889
2015-12-14	23:59:00	-4.7512	-5.3815	-5.9113	-6.8843			-2.1903		-6.0612	-4.3742	-1.526
2015-12-15	01:59:00	-5.0654	-5.3815	-5.9113	-6.8843			-3.0715		-6.1873	-4.3742	-1.463
2015-12-15	03:59:00	-5.4424	-5.5705	-6.1627	-7.1358			-3.89		-6.3764	-4.3742	-1.463
2015-12-15	05:59:00	-5.7567	-5.8226	-6.3513	-7.1987			-4.5827		-6.5656	-4.3742	-1.463
2015-12-15	07:59:00	-6.0709	-6.0747	-6.6027	-7.3873			-5.1495		-6.8178	-4.437	-1.463
2015-12-15	09:59:00	-6.1338	-6.1377	-6.6027	-7.3244			-5.1495		-6.8178	-4.437	-1.526
2015-12-15	11:59:00	-5.3796	-6.0747	-6.4142	-7.0101			-3.3863		-6.5656	-4.437
2015-12-15	13:59:00	-2.8664	-5.8226	-5.9742	-6.57			0.1377		-6.1242	-4.4999
2015-12-15	15:59:00	-3.1805	-5.5705	-5.6599	-6.0043			-0.6172		-5.746	-4.4999
2015-12-15	17:59:00	-3.9344	-5.5705	-5.6599	-6.0672			-2.0015		-5.809	-4.4999
2015-12-15	19:59:00	-4.3113	-5.5705	-5.7228	-6.0672			-3.0086		-5.809	-4.4999
2015-12-15	21:59:00	-4.6255	-5.6966	-5.8485	-6.3186			-3.7011		-5.9351	-4.4999
2015-12-15	23:59:00	-4.8769	-5.7596	-5.9742	-6.4443			-4.1419		-6.0612	-4.4999
2015-12-16	01:59:00	-4.9397	-5.7596	-5.9742	-6.3186			-4.3937		-5.9981	-4.4999
2015-12-16	03:59:00	-4.8769	-5.6966	-5.7856	-6.0672			-4.3937		-5.809	-4.4999
2015-12-16	05:59:00	-4.6883	-5.5075	-5.5971	-5.8158			-4.3308		-5.6199	-4.4999
2015-12-16	07:59:00	-4.7512	-5.5075	-5.5971	-5.8786			-4.4567		-5.6199	-4.4999
2015-12-16	09:59:00	-4.5627	-5.3185	-5.4086	-5.5644			-4.3308		-5.4308	-4.4999
2015-12-16	11:59:00	-4.2485	-5.0664	-4.9687	-5.1873			-3.89		-4.9896	-4.4999
2015-12-16	13:59:00	-3.9344	-4.6884	-4.5288	-4.7474			-3.5752		-4.6115	-4.4999
2015-12-16	15:59:00	-3.5574	-4.3734	-4.2146	-4.4332			-3.2604		-4.4225	-4.437
2015-12-16	17:59:00	-3.5574	-4.2474	-4.1518	-4.3704			-3.2604		-4.3594	-4.437
2015-12-16	19:59:00	-3.5574	-4.2474	-4.1518	-4.4332			-3.3233		-4.3594	-4.437
2015-12-16	21:59:00	-3.5574	-4.2474	-4.1518	-4.4332			-3.3863		-4.3594	-4.3742
2015-12-16	23:59:00	-3.5574	-4.2474	-4.2146	-4.4332			-3.3863		-4.3594	-4.3113
2015-12-17	01:59:00	-3.4946	-4.1214	-4.089	-4.3704			-3.3233		-4.2964	-4.3113
2015-12-17	03:59:00	-3.4318	-4.0584	-4.0261	-4.2447			-3.2604		-4.2334	-4.2485
2015-12-17	05:59:00	-3.3061	-3.8694	-3.8377	-4.119			-3.1345		-4.1074	-4.2485
2015-12-17	07:59:00	-3.1805	-3.8064	-3.712	-4.0562			-3.0715		-3.9814	-4.1856
2015-12-17	09:59:00	-3.1805	-3.7435	-3.712	-4.0562			-3.0086		-3.9814	-4.1856
2015-12-17	11:59:00	-2.9292	-3.6175	-3.5235	-3.8677			-2.7568		-3.8554	-4.1228
2015-12-17	13:59:00	-2.3639	-3.6175	-3.5235	-3.9305			-1.9386		-3.7924	-4.0599
2015-12-17	15:59:00	-1.9242	-3.6175	-3.5235	-3.9934			-1.1834		-3.7924	-4.0599
2015-12-17	17:59:00	-2.5523	-3.7435	-3.6492	-4.119			-1.6239		-3.9184	-3.9971
2015-12-17	19:59:00	-3.2433	-3.9954	-4.0261	-4.4332			-2.505		-4.1074	-3.9971
2015-12-17	21:59:00	-3.7459	-4.3104	-4.4031	-4.7474			-3.2604		-4.3594	-3.9342
2015-12-17	23:59:00	-4.1228	-4.6254	-4.7173	-4.9988			-3.7641		-4.6115	-3.9342
2015-12-18	01:59:00	-4.3742	-4.7514	-4.9058	-5.1244			-4.0789		-4.6745	-3.9342
2015-12-18	03:59:00	-4.4998	-4.7514	-4.843	-5.1244			-4.2048		-4.7375	-3.9342
2015-12-18	05:59:00	-4.6255	-4.8144	-4.9058	-5.1244			-4.2678		-4.7375	-3.9342
2015-12-18	07:59:00	-4.4998	-4.6254	-4.7173	-4.9988			-4.2048		-4.6745	-3.9342
2015-12-18	09:59:00	-3.9344	-4.1214	-4.089	-4.4332			-3.6381		-4.2964	-3.9342
2015-12-18	11:59:00	-3.3689	-3.8064	-3.712	-4.119			-3.0086		-3.9814	-3.9342
2015-12-18	13:59:00	-3.1805	-3.8064	-3.712	-4.0562			-2.7568		-3.9184	-3.9342
2015-12-18	15:59:00	-3.0548	-3.7435	-3.6492	-3.9934			-2.6309		-3.8554	-3.8713
2015-12-18	17:59:00	-3.1176	-3.8064	-3.712	-3.9934			-2.7568		-3.8554	-3.8713
2015-12-18	19:59:00	-3.1805	-3.8064	-3.712	-3.9934			-2.8827		-3.8554	-3.8713
2015-12-18	21:59:00	-3.1805	-3.7435	-3.712	-3.9934			-2.8827		-3.8554	-3.8085
2015-12-18	23:59:00	-3.1805	-3.8064	-3.7748	-3.9934			-3.0086		-3.8554	-3.8085
2015-12-19	01:59:00	-3.2433	-3.8064	-3.7748	-3.9934			-3.0715		-3.8554	-3.8085
2015-12-19	03:59:00	-3.2433	-3.7435	-3.712	-3.9305			-3.0086		-3.7924	-3.7456
2015-12-19	05:59:00	-3.3061	-3.8064	-3.7748	-3.9934			-3.1345		-3.7924	-3.7456
2015-12-19	07:59:00	-3.2433	-3.7435	-3.6492	-3.9305			-3.0715		-3.7294	-3.7456
2015-12-19	09:59:00	-3.1805	-3.7435	-3.6492	-3.9305			-3.0086		-3.7294	-3.7456
2015-12-19	11:59:00	-2.9292	-3.8064	-3.7748	-4.119			-1.561		-3.8554	-3.6828
2015-12-19	13:59:00	-1.4218	-3.6805	-3.5864	-4.0562			1.0811		-3.7924	-3.6828
2015-12-19	15:59:00	-0.6055	-3.4915	-3.3351	-3.9305			2.5901		-3.6034	-3.6828
2015-12-19	17:59:00	-1.2334	-3.4915	-3.3351	-3.9305			0.8925		-3.6034	-3.6199
2015-12-19	19:59:00	-2.1126	-3.6175	-3.5235	-4.119			-0.3026		-3.7294	-3.6199
2015-12-19	21:59:00	-2.5523	-3.7435	-3.7748	-4.3075			-1.2463		-3.8554	-3.6199
2015-12-19	23:59:00	-2.8664	-3.8694	-3.9005	-4.4332			-1.8127		-3.9184	-3.6199
2015-12-20	01:59:00	-3.0548	-4.0584	-4.1518	-4.5589			-2.0644		-4.0444	-3.5571
2015-12-20	03:59:00	-3.1176	-3.8694	-4.0261	-4.496			-2.1903		-3.9814	-3.5571
2015-12-20	05:59:00	-3.1805	-3.7435	-3.8377	-4.4332			-2.2532		-3.9184	-3.5571
2015-12-20	07:59:00	-3.1805	-3.6175	-3.712	-4.3704			-2.3162		-3.8554	-3.5571
2015-12-20	09:59:00	-3.1805	-3.5545	-3.712	-4.3704			-1.7498		-3.8554	-3.5571
2015-12-20	11:59:00	-2.3639	-3.3655	-3.4607	-4.2447			1.5213		-3.7294	-3.5571
2015-12-20	13:59:00	-0.3543	-3.1766	-3.2723	-4.119			4.7897		-3.6034	-3.5571
2015-12-20	15:59:00	0.3363	-2.9247	-2.8953	-3.9305			5.4179		-3.3514	-3.5571
2015-12-20	17:59:00	-0.4171	-2.6099	-2.5813	-3.7421			3.6586		-3.1624	-3.5571
2015-12-20	19:59:00	-1.2334	-2.5469	-2.6441	-3.8049			1.5213		-3.1624	-3.4943
2015-12-20	21:59:00	-1.7986	-2.6099	-2.7697	-3.8677			0.4522		-3.2254	-3.4943
2015-12-20	23:59:00	-2.1755	-2.8617	-3.0838	-4.119			-0.1139		-3.3514	-3.4314
2015-12-21	01:59:00	-2.4267	-3.1766	-3.4607	-4.3075			-0.5542		-3.4144	-3.4314
2015-12-21	03:59:00	-2.4895	-3.3026	-3.5864	-4.3075			-0.9317		-3.4144	-3.4314
2015-12-21	05:59:00	-2.6151	-3.4285	-3.5864	-4.3075			-1.3722		-3.4774	-3.3686
2015-12-21	07:59:00	-2.6779	-3.4915	-3.6492	-4.2447			-1.7498		-3.4774	-3.3686
2015-12-21	09:59:00	-2.7408	-3.4915	-3.6492	-4.2447			-1.6239		-3.4774	-3.3686
2015-12-21	11:59:00	-2.4267	-3.3655	-3.4607	-4.0562			-0.8059		-3.3514	-3.3686
2015-12-21	13:59:00	-2.0498	-3.1766	-3.1466	-3.7421			-0.4913		-3.1624	-3.3686
2015-12-21	15:59:00	-1.9242	-3.1766	-3.0838	-3.6164			-0.4913		-3.0994	-3.3686
2015-12-21	17:59:00	-2.3011	-3.3026	-3.3351	-3.7421			-1.2463		-3.2254	-3.3686
2015-12-21	19:59:00	-3.1805	-3.8064	-3.9633	-4.1819			-2.505		-3.6664	-3.3686
2015-12-21	21:59:00	-3.8087	-4.2474	-4.466	-4.6217			-3.5122		-3.9814	-3.3686
2015-12-21	23:59:00	-4.1228	-4.5624	-4.7801	-5.0616			-3.953		-4.1704	-3.3057
2015-12-22	01:59:00	-4.3113	-4.6254	-4.7173	-5.4387			-4.0159		-4.2964	-3.3686
2015-12-22	03:59:00	-4.3742	-4.4994	-4.3403	-5.7529			-4.0159		-4.3594	-3.3686
2015-12-22	05:59:00	-4.1228	-4.3104	-4.1518	-5.6272			-3.7641		-4.3594	-3.3686
2015-12-22	07:59:00	-3.8715	-3.9324	-3.7748	-5.3758			-3.3863		-4.2334	-3.4314
2015-12-22	09:59:00	-3.8087	-3.3655	-3.2723	-4.5589			-3.0086		-3.8554	-3.4314
2015-12-22	11:59:00	-2.8664	-2.9247	-2.7697	-3.9934			-0.3026		-3.4774	-3.4314
2015-12-22	13:59:00	-0.6683	-2.4839	-2.2044	-3.4279			2.9673		-3.0994	-3.4314
2015-12-22	15:59:00	0.2735	-1.9173	-1.5135	-3.051			4.1614		-2.6585	-3.4314
2015-12-22	17:59:00	-0.5427	-1.7284	-1.4507	-3.051			2.5901		-2.5955	-3.4314
2015-12-22	19:59:00	-1.1706	-1.6654	-1.5763	-3.1766			0.9554		-2.5955	-3.3686
2015-12-22	21:59:00	-1.4846	-1.7914	-1.702	-3.1138			0.2635		-2.5955	-3.3057
2015-12-22	23:59:00	-1.6102	-1.9173	-1.8276	-3.1138			0.0748		-2.5325	-3.3057
2015-12-23	01:59:00	-1.6102	-1.8543	-1.702	-2.9882			-0.1139		-2.3436	-3.2429
2015-12-23	03:59:00	-1.673	-1.9173	-1.7648	-2.9882			-0.1768		-2.2176	-3.18
2015-12-23	05:59:00	-1.7358	-1.8543	-1.702	-2.8625			-0.3655		-2.2176	-3.18
2015-12-23	07:59:00	-1.9242	-1.9173	-1.7648	-2.9254			-0.743		-2.3436	-3.1172
2015-12-23	09:59:00	-2.2383	-2.1691	-2.0788	-3.3023			-0.6801		-2.4696	-3.1172
2015-12-23	11:59:00	-1.7358	-2.2321	-2.2044	-3.4279			2.8416		-2.5955	-3.0543
2015-12-23	13:59:00	0.3363	-2.358	-2.2672	-3.5536			6.6113		-2.6585	-3.0543
2015-12-23	15:59:00	1.0896	-2.4839	-2.3928	-3.6164			7.0509		-2.7845	-2.9915
2015-12-23	17:59:00	-0.4171	-2.9247	-2.9582	-4.1819			4.1614		-3.1624	-2.9915
2015-12-23	19:59:00	-1.987	-3.4915	-3.7748	-4.8102			1.2698		-3.6664	-2.9915
2015-12-23	21:59:00	-2.6151	-3.6805	-3.9633	-4.7474			0.1377		-3.7924	-2.9915
2015-12-23	23:59:00	-2.992	-3.8064	-4.1518	-4.8731			-0.6801		-3.8554	-2.9915
2015-12-24	01:59:00	-3.4946	-4.1214	-4.5916	-5.2501			-1.561		-4.1074	-2.9915
2015-12-24	03:59:00	-3.8715	-4.4364	-4.9058	-5.5015			-2.2532		-4.2334	-3.0543
2015-12-24	05:59:00	-4.06	-4.4994	-4.9687	-5.5015			-2.8197		-4.4225	-3.0543
2015-12-24	07:59:00	-4.2485	-4.4364	-4.843	-5.5015			-3.1974		-4.5485	-3.1172
2015-12-24	09:59:00	-4.437	-4.4364	-4.7801	-5.5015			-3.0715		-4.6115	-3.1172
2015-12-24	11:59:00	-3.683	-4.4364	-4.7801	-5.5644			0.5151		-4.5485	-3.18
2015-12-24	13:59:00	-0.9194	-4.3104	-4.5288	-5.313			4.7897		-4.3594	-3.2429
2015-12-24	15:59:00	0.0852	-3.8064	-3.7748	-4.4332			4.8525		-3.8554	-3.2429
2015-12-24	17:59:00	-0.9194	-3.7435	-3.7748	-4.6846			2.653		-3.9814	-3.3057
2015-12-24	19:59:00	-1.987	-3.8064	-3.9005	-4.6846			0.7667		-4.0444	-3.3057
2015-12-24	21:59:00	-2.5523	-3.9324	-4.089	-4.7474			-0.1139		-4.1074	-3.3057
2015-12-24	23:59:00	-2.992	-3.9954	-4.2146	-4.8102			-1.1205		-4.2334	-3.3057
2015-12-25	01:59:00	-3.3689	-4.1844	-4.3403	-4.9988			-1.8756		-4.3594	-3.3057
2015-12-25	03:59:00	-3.9344	-4.4994	-4.7801	-5.3758			-2.7568		-4.6115	-3.3686
2015-12-25	05:59:00	-4.1857	-4.4994	-4.7173	-5.2501			-3.1974		-4.6115	-3.3686
2015-12-25	07:59:00	-4.3113	-4.4994	-4.7801	-5.313			-3.5122		-4.6745	-3.3686
2015-12-25	09:59:00	-4.3742	-4.4994	-4.7801	-5.313			-3.2604		-4.6745	-3.3686
2015-12-25	11:59:00	-3.4318	-4.0584	-4.1518	-4.8102			-0.1139		-4.4225	-3.4314
2015-12-25	13:59:00	-1.045	-3.6805	-3.6492	-4.3704			3.1558		-4.1074	-3.4314
2015-12-25	15:59:00	-0.0404	-3.3655	-3.1466	-3.9305			4.1614		-3.7294	-3.4314
2015-12-25	17:59:00	-0.9822	-3.2396	-3.1466	-4.119			2.4015		-3.6664	-3.4314
2015-12-25	19:59:00	-1.9242	-3.2396	-3.2723	-4.1819			0.5151		-3.8554	-3.4314
2015-12-25	21:59:00	-2.4895	-3.1766	-3.2723	-4.3075			-0.4284		-3.9184	-3.4314
2015-12-25	23:59:00	-2.8036	-3.1136	-3.2723	-4.3075			-1.0576		-3.9184	-3.4314
2015-12-26	01:59:00	-3.0548	-2.9877	-3.1466	-4.1819			-1.498		-3.9184	-3.3686
2015-12-26	03:59:00	-3.3061	-2.9247	-3.0838	-4.119			-1.8127		-3.9184	-3.3686
2015-12-26	05:59:00	-3.4318	-2.9247	-3.0838	-4.119			-2.1274		-3.9184	-3.3686
2015-12-26	07:59:00	-3.6202	-2.9247	-3.1466	-4.119			-2.3162		-3.9184	-3.3686
2015-12-26	09:59:00	-3.8087	-2.9247	-3.1466	-4.119			-2.1274		-3.8554	-3.3686
2015-12-26	11:59:00	-2.9292	-2.8617	-3.0838	-3.9934			1.4584		-3.7294	-3.3686
2015-12-26	13:59:00	-0.3543	-2.6099	-2.6441	-3.6164			5.3551		-3.4144	-3.3057
2015-12-26	15:59:00	0.713	-2.421	-2.33	-3.3651			6.4229		-3.2254	-3.3057
2015-12-26	17:59:00	-0.2915	-2.295	-2.2672	-3.3651			4.3499		-3.1624	-3.3057
2015-12-26	19:59:00	-1.359	-2.358	-2.5185	-3.6792			1.8986		-3.3514	-3.3057
2015-12-26	21:59:00	-2.1126	-2.5469	-2.7697	-3.9305			0.578		-3.5404	-3.2429
2015-12-26	23:59:00	-2.6779	-2.6099	-2.8953	-3.9934			-0.3026		-3.6664	-3.2429
2015-12-27	01:59:00	-2.992	-2.5469	-2.8325	-3.9305			-0.9947		-3.6664	-3.2429
2015-12-27	03:59:00	-3.2433	-2.5469	-2.8325	-3.9305			-1.4351		-3.7294	-3.18
2015-12-27	05:59:00	-3.5574	-2.6099	-2.8953	-3.9934			-1.8127		-3.8554	-3.18
2015-12-27	07:59:00	-3.9972	-2.7358	-3.0838	-4.2447			-2.2532		-3.9814	-3.18
2015-12-27	09:59:00	-4.1228	-2.7358	-3.0838	-4.1819			-2.0015		-3.9184	-3.18
2015-12-27	11:59:00	-3.1176	-2.6099	-2.8953	-3.9934			1.4584		-3.7924	-3.18
2015-12-27	13:59:00	-0.6055	-2.421	-2.5813	-3.5536			5.041		-3.4774	-3.18
2015-12-27	15:59:00	0.3991	-2.295	-2.2672	-3.2395			5.6064		-3.2254	-3.18
2015-12-27	17:59:00	-0.6055	-2.358	-2.4556	-3.5536			3.6586		-3.3514	-3.18
2015-12-27	19:59:00	-1.7986	-2.6099	-2.8325	-3.9305			1.3327		-3.6664	-3.1172
2015-12-27	21:59:00	-2.4895	-2.7358	-3.0838	-4.119			0.2006		-3.8554	-3.1172
2015-12-27	23:59:00	-2.9292	-2.7988	-3.2094	-4.1819			-0.6172		-3.9814	-3.1172
2015-12-28	01:59:00	-3.1176	-2.7988	-3.1466	-4.1819			-1.1834		-3.9814	-3.1172
2015-12-28	03:59:00	-3.5574	-2.7358	-3.1466	-4.2447			-1.6239		-3.9814	-3.1172
2015-12-28	05:59:00	-3.7459	-2.8617	-3.3351	-4.3704			-2.0644		-4.1074	-3.1172
2015-12-28	07:59:00	-3.8087	-2.7988	-3.3351	-4.3704			-2.3162		-4.1074	-3.1172
2015-12-28	09:59:00	-3.9972	-2.6728	-3.1466	-4.119			-2.0644		-3.9814	-3.1172
2015-12-28	11:59:00	-3.3061	-2.7358	-3.2094	-4.1819			1.5842		-3.8554	-3.1172
2015-12-28	13:59:00	-0.5427	-2.5469	-2.8325	-3.7421			6.1089		-3.5404	-3.1172
2015-12-28	15:59:00	0.9013	-2.2321	-2.33	-3.3023			7.5532		-3.2254	-3.18
2015-12-28	17:59:00	-0.0404	-2.2321	-2.33	-3.4908			5.732		-3.2254	-3.18
2015-12-28	19:59:00	-1.2962	-2.6099	-2.8953	-3.9934			3.0301		-3.5404	-3.1172
2015-12-28	21:59:00	-2.0498	-2.7358	-3.0838	-4.119			1.3327		-3.7294	-3.1172
2015-12-28	23:59:00	-2.6151	-2.7988	-3.2094	-4.3704			0.3893		-3.9184	-3.1172
2015-12-29	01:59:00	-3.0548	-2.9247	-3.5235	-4.6846			-0.4284		-4.1074	-3.1172
2015-12-29	03:59:00	-3.4318	-3.0507	-3.6492	-4.8731			-1.1205		-4.2334	-3.1172
2015-12-29	05:59:00	-3.8715	-3.1136	-3.7748	-5.0616			-1.6868		-4.2964	-3.1172
2015-12-29	07:59:00	-4.1228	-3.1766	-3.9633	-5.2501			-2.2532		-4.4225	-3.1172
2015-12-29	09:59:00	-4.3113	-3.2396	-4.0261	-5.2501			-2.1903		-4.4225	-3.18
2015-12-29	11:59:00	-3.6202	-3.1766	-3.9633	-5.0616			1.7099		-4.2964	-3.18
2015-12-29	13:59:00	-0.7311	-3.1766	-3.712	-4.8102			5.9204		-4.1074	-3.18
2015-12-29	15:59:00	0.7757	-3.1136	-3.4607	-4.6217			7.302		-3.9184	-3.2429
2015-12-29	17:59:00	-0.4171	-3.3026	-3.5864	-4.8731			5.3551		-4.0444	-3.2429
2015-12-29	19:59:00	-1.7986	-3.7435	-4.2775	-5.5644			2.653		-4.6115	-3.2429
2015-12-29	21:59:00	-2.992	-4.2474	-4.9687	-6.0672			0.7667		-5.1157	-3.2429
2015-12-29	23:59:00	-3.9344	-4.6884	-5.4714	-6.4443			-0.8059		-5.4939	-3.2429
2015-12-30	01:59:00	-4.5627	-5.0034	-5.9113	-6.7586			-1.8756		-5.746	-3.3057
2015-12-30	03:59:00	-5.0025	-5.3185	-6.2885	-7.0729			-2.6938		-5.9981	-3.3686
2015-12-30	05:59:00	-5.1911	-5.5075	-6.477	-7.2615			-3.0086		-6.1873	-3.3686
2015-12-30	07:59:00	-5.2539	-5.5705	-6.477	-7.0101			-3.1974		-5.9351	-3.4314
2015-12-30	09:59:00	-5.2539	-5.6335	-6.477	-6.9472			-2.9456		-5.746	-3.5571
2015-12-30	11:59:00	-4.3113	-5.4445	-6.0999	-6.5072			0.0748		-5.3678	-3.6199
2015-12-30	13:59:00	-1.5474	-5.1924	-5.6599	-6.2557			3.1558		-5.2417	-3.6828
2015-12-30	15:59:00	-0.2287	-4.9404	-5.1572	-5.9415			4.3499		-4.9896	-3.6828
2015-12-30	17:59:00	-1.2962	-4.8774	-5.0943	-5.8786			2.5901		-4.8006	-3.7456
2015-12-30	19:59:00	-2.3639	-5.0034	-5.2829	-6.13			0.7038		-4.8636	-3.7456
2015-12-30	21:59:00	-3.1176	-5.0664	-5.4714	-6.3186			-0.2397		-5.0527	-3.8085
2015-12-30	23:59:00	-3.4318	-5.0034	-5.3457	-6.13			-0.9947		-4.9896	-3.8085
2015-12-31	01:59:00	-3.6202	-4.9404	-5.2829	-6.0043			-1.3722		-4.8006	-3.8085
2015-12-31	03:59:00	-3.8715	-4.8144	-5.1572	-5.8158			-1.8127		-4.8006	-3.8713
2015-12-31	05:59:00	-4.1228	-4.6254	-4.9058	-5.8158			-2.3162		-4.9896	-3.8713
2015-12-31	07:59:00	-4.5627	-4.5624	-4.9058	-5.8158			-2.8827		-5.1787	-3.8713
2015-12-31	09:59:00	-4.8769	-4.6884	-5.0315	-5.9415			-2.8827		-5.2417	-3.9342
2015-12-31	11:59:00	-4.4998	-4.6254	-4.9687	-5.5644			-0.9947		-4.9266	-3.9342
2015-12-31	13:59:00	-3.6202	-4.2474	-4.4031	-4.9359			-0.4913		-4.4225	-3.9342
2015-12-31	15:59:00	-3.6202	-4.2474	-4.4031	-4.8731			-0.9947		-4.4225	-3.9342
2015-12-31	17:59:00	-3.6202	-4.5624	-4.7173	-4.9988			-1.6868		-4.6115	-3.9342
2015-12-31	19:59:00	-3.5574	-4.8774	-5.0943	-5.0616			-2.2532		-4.7375	-3.9342
2015-12-31	21:59:00	-3.4946	-5.0664	-5.22	-5.1244			-2.5679		-4.8006	-3.9342
2015-12-31	23:59:00	-3.4318	-5.1294	-5.2829	-5.1244			-2.8197		-4.8636	-3.9342
2016-01-01	01:59:00	-3.3689	-5.1294	-5.3457	-5.1244			-2.9456		-4.8636	-3.9342
2016-01-01	03:59:00	-3.3061	-5.1294	-5.2829	-5.1244			-3.0086		-4.8636	-3.9342
2016-01-01	05:59:00	-3.2433	-5.2554	-5.4714	-5.1244			-3.2604		-4.9896	-3.9342
2016-01-01	07:59:00	-3.2433	-5.5075	-5.7228	-5.1873			-3.5122		-5.1157	-3.9342
2016-01-01	09:59:00	-3.2433	-5.7596	-5.9742	-5.2501			-3.7641		-5.2417	-3.9971
2016-01-01	11:59:00	-3.1805	-5.8226	-6.037	-5.2501			-3.5122		-5.2417	-3.9971
2016-01-01	13:59:00	-2.992	-6.0117	-6.1627	-5.3758			-0.8688		-5.4308	-3.9971
2016-01-01	15:59:00	-2.7408	-6.2638	-6.4142	-5.5015			0.7038		-5.5569	-3.9971
2016-01-01	17:59:00	-2.9292	-6.4529	-6.6656	-5.6272			-0.2397		-5.746	-4.0599
2016-01-01	19:59:00	-3.1176	-6.642	-7.0428	-5.8158			-2.505		-5.9351	-4.0599
2016-01-01	21:59:00	-3.2433	-6.8311	-7.2313	-6.0043			-3.89		-6.1242	-4.0599
2016-01-01	23:59:00	-3.3061	-6.7681	-7.1685	-6.13			-4.5197		-6.1873	-4.1228
2016-01-02	01:59:00	-3.4318	-6.642	-6.917	-6.2557			-4.7716		-6.1873	-4.1856
2016-01-02	03:59:00	-3.4318	-6.5789	-6.7913	-6.3186			-4.9605		-6.1873	-4.1856
2016-01-02	05:59:00	-3.4946	-6.5789	-6.7285	-6.3815			-5.2125		-6.1873	-4.2485
2016-01-02	07:59:00	-3.4946	-6.5789	-6.7913	-6.3815			-5.3384		-6.2503	-4.2485
2016-01-02	09:59:00	-3.5574	-6.5159	-6.7285	-6.3815			-5.3384		-6.1873	-4.3113
2016-01-02	11:59:00	-3.4946	-6.1377	-6.2256	-6.1929			-4.7086		-5.9351	-4.3113
2016-01-02	13:59:00	-3.4318	-5.6335	-5.5343	-5.9415			-3.953		-5.5569	-4.3742
2016-01-02	15:59:00	-3.3061	-5.3185	-5.0943	-5.7529			-3.0715		-5.3678	-4.3742
2016-01-02	17:59:00	-3.2433	-5.2554	-5.0943	-5.6272			-3.3233		-5.2417	-4.3742
2016-01-02	19:59:00	-3.2433	-5.3815	-5.3457	-5.5644			-3.6381		-5.2417	-4.3742
2016-01-02	21:59:00	-3.2433	-5.5075	-5.5971	-5.5015			-3.89		-5.3048	-4.3742
2016-01-02	23:59:00	-3.2433	-6.1377	-6.2885	-5.6272			-4.4567		-5.5569	-4.3742
2016-01-03	01:59:00	-3.3061	-6.705	-6.917	-5.7529			-4.8975		-5.8721	-4.3742
2016-01-03	03:59:00	-3.4946	-7.0833	-7.3571	-5.9415			-5.0865		-6.1242	-4.3742
2016-01-03	05:59:00	-3.5574	-7.3985	-7.6714	-6.0672			-5.0235		-6.3134	-4.3742
2016-01-03	07:59:00	-3.683	-7.5876	-7.7972	-6.13			-4.9605		-6.5025	-4.3742
2016-01-03	09:59:00	-3.683	-7.6507	-7.7972	-6.1929			-4.7716		-6.5656	-4.437
2016-01-03	11:59:00	-3.683	-7.4615	-7.6086	-6.13			-4.5827		-6.4395	-4.437
2016-01-03	13:59:00	-3.4946	-7.2724	-7.3571	-6.13			-4.1419		-6.3134	-4.4999
2016-01-03	15:59:00	-3.3061	-7.1463	-7.1685	-6.13			-3.7641		-6.3764	-4.4999
2016-01-03	17:59:00	-3.4318	-7.2093	-7.2942	-6.2557			-3.7641		-6.8808	-4.5628
2016-01-03	19:59:00	-3.5574	-7.3354	-7.4828	-6.4443			-3.89		-7.1331	-4.5628
2016-01-03	21:59:00	-3.6202	-7.3985	-7.6086	-6.57			-4.7716		-7.1961	-4.5628
2016-01-03	23:59:00	-3.6202	-7.3985	-7.6714	-6.6329			-5.5274		-7.1961	-4.6256
2016-01-04	01:59:00	-3.6202	-7.3985	-7.6714	-6.8215			-6.2204		-7.5745	-4.6256
2016-01-04	03:59:00	-3.6202	-7.2093	-7.4199	-6.8215			-6.0944		-7.1331	-4.6256
2016-01-04	05:59:00	-3.6202	-7.2724	-7.4828	-7.1358			-6.1574		-7.1961	-4.6885
2016-01-04	07:59:00	-3.7459	-7.4615	-7.6714	-7.4501			-6.4094		-7.3223	-4.6885
2016-01-04	09:59:00	-4.1228	-7.6507	-7.86	-7.7016			-6.6614		-7.4484	-4.7513
2016-01-04	11:59:00	-4.1857	-7.7768	-7.9858	-7.7016			-6.6614		-7.4484	-4.7513
2016-01-04	13:59:00	-4.1857	-7.7137	-7.7972	-7.4501			-6.2834		-7.1961	-4.7513
2016-01-04	15:59:00	-4.1228	-7.8399	-7.9858	-7.6388			-6.2204		-7.2592	-4.8142
2016-01-04	17:59:00	-4.3742	-8.1551	-8.363	-8.2046			-6.7874		-7.5745	-4.8142
2016-01-04	19:59:00	-4.4998	-8.4705	-8.7403	-8.6448			-7.3545		-7.8899	-4.8142
2016-01-04	21:59:00	-4.814	-8.7858	-9.1176	-9.2108			-7.9848		-8.2684	-4.8771
2016-01-04	23:59:00	-5.0654	-8.8489	-9.1805	-9.2737			-8.2369		-8.3314	-4.8771
2016-01-05	01:59:00	-5.2539	-8.912	-9.2434	-9.3994			-8.426		-8.3945	-4.9399
2016-01-05	03:59:00	-5.5053	-9.0381	-9.4949	-9.7768			-8.9303		-8.7099	-5.0028
2016-01-05	05:59:00	-5.631	-9.0381	-9.4949	-9.7139			-9.0564		-8.7099	-5.0028
2016-01-05	07:59:00	-5.631	-8.8489	-9.2434	-9.3994			-8.7412		-8.5207	-5.0657
2016-01-05	09:59:00	-5.631	-8.7227	-9.1176	-9.2108			-8.5521		-8.3945	-5.1285
2016-01-05	11:59:00	-5.5053	-8.5335	-8.7403	-8.6448			-7.9218		-8.0791	-5.1914
2016-01-05	13:59:00	-5.4424	-8.5335	-8.6145	-8.5819			-7.6066		-8.016	-5.1914
2016-01-05	15:59:00	-5.4424	-8.5966	-8.6774	-8.6448			-7.5436		-7.953	-5.2543
2016-01-05	17:59:00	-5.5053	-8.5966	-8.8032	-8.8335			-7.8587		-8.0791	-5.2543
2016-01-05	19:59:00	-5.631	-8.5966	-8.8661	-8.8335			-8.1109		-8.1422	-5.3171
2016-01-05	21:59:00	-5.631	-8.5966	-8.929	-8.8335			-8.2369		-8.1422	-5.3171
2016-01-05	23:59:00	-5.6938	-8.6597	-8.929	-8.8963			-8.3		-8.2053	-5.3171
2016-01-06	01:59:00	-5.7567	-8.6597	-8.9918	-8.9592			-8.426		-8.2684	-5.38
2016-01-06	03:59:00	-5.9452	-8.7227	-9.1176	-9.1479			-8.7412		-8.4576	-5.38
2016-01-06	05:59:00	-6.1338	-8.7858	-9.3692	-9.4623			-9.2456		-8.7099	-5.38
2016-01-06	07:59:00	-6.3852	-9.0381	-9.6836	-9.9026			-9.8131		-9.0885	-5.4429
2016-01-06	09:59:00	-6.5738	-9.1643	-9.9352	-10.1542			-9.9392		-9.3409	-5.4429
2016-01-06	11:59:00	-6.3223	-9.0381	-9.5578	-9.651			-6.4094		-8.8992	-5.5057
2016-01-06	13:59:00	-5.3167	-8.975	-9.3692	-9.4623			-2.505		-8.7099	-5.5057
2016-01-06	15:59:00	-5.3167	-8.8489	-9.0547	-8.9592			-3.3863		-8.3314	-5.5686
2016-01-06	17:59:00	-5.4424	-8.912	-9.1176	-9.085			-5.0865		-8.4576	-5.5686
2016-01-06	19:59:00	-5.5681	-9.1643	-9.4321	-9.4623			-6.6614		-8.5838	-5.6315
2016-01-06	21:59:00	-5.5681	-9.2273	-9.5578	-9.4623			-7.2915		-8.6469	-5.6315
2016-01-06	23:59:00	-5.631	-9.2904	-9.5578	-9.4623			-7.7327		-8.6469	-5.6315
2016-01-07	01:59:00	-5.631	-9.2273	-9.4321	-9.3366			-7.8587		-8.5838	-5.6944
2016-01-07	03:59:00	-5.5681	-9.1643	-9.3063	-9.1479			-7.9848		-8.4576	-5.6944
2016-01-07	05:59:00	-5.5053	-9.0381	-9.1805	-9.0221			-8.0478		-8.3945	-5.7572
2016-01-07	07:59:00	-5.5053	-9.0381	-9.1805	-8.9592			-8.3		-8.3945	-5.7572
2016-01-07	09:59:00	-5.5053	-9.1012	-9.3063	-9.085			-8.7412		-8.5838	-5.7572
2016-01-07	11:59:00	-5.5053	-9.1012	-9.3692	-9.1479			-6.6614		-8.5838	-5.7572
2016-01-07	13:59:00	-5.3167	-8.912	-9.1805	-9.085			-4.7086		-8.5838	-5.8201
2016-01-07	15:59:00	-5.3167	-8.6597	-8.8661	-8.7077			-5.9054		-8.2684	-5.8201
2016-01-07	17:59:00	-5.2539	-7.8399	-7.7343	-7.6388			-6.0944		-7.4484	-5.8201
2016-01-07	19:59:00	-5.1911	-7.2724	-7.1056	-7.1358			-5.9684		-6.9439	-5.8201
2016-01-07	21:59:00	-5.1911	-7.2724	-7.1685	-7.3244			-6.2204		-7.07	-5.8201
2016-01-07	23:59:00	-5.3167	-7.5246	-7.5457	-7.7016			-6.6614		-7.3223	-5.8201
2016-01-08	01:59:00	-5.3167	-7.6507	-7.6714	-7.8274			-6.7874		-7.3853	-5.8201
2016-01-08	03:59:00	-5.3796	-7.8399	-7.9229	-7.9531			-7.0395		-7.5115	-5.8201
2016-01-08	05:59:00	-5.5053	-8.0921	-8.2373	-8.2675			-7.4176		-7.8268	-5.8201
2016-01-08	07:59:00	-5.5681	-8.2813	-8.4259	-8.4562			-7.6697		-7.953	-5.7572
2016-01-08	09:59:00	-5.6938	-8.4074	-8.6145	-8.5819			-7.8587		-8.0791	-5.7572
2016-01-08	11:59:00	-5.6938	-8.3443	-8.4888	-8.519			-7.4806		-7.953	-5.7572
2016-01-08	13:59:00	-5.631	-8.3443	-8.4259	-8.3933			-6.4094		-7.8899	-5.7572
2016-01-08	15:59:00	-5.5681	-7.9029	-7.9229	-7.8903			-6.3464		-7.3223	-5.8201
2016-01-08	17:59:00	-5.4424	-7.5246	-7.4828	-7.6388			-6.2204		-7.007	-5.8201
2016-01-08	19:59:00	-5.3796	-7.2093	-7.1056	-7.3873			-6.0314		-6.7547	-5.8201
2016-01-08	21:59:00	-5.2539	-6.8311	-6.7285	-7.0729			-5.7164		-6.3764	-5.8201
2016-01-08	23:59:00	-5.0654	-6.3898	-6.2256	-6.6958			-5.3384		-5.9351	-5.7572
2016-01-09	01:59:00	-4.9397	-6.0117	-5.8485	-6.3186			-4.9605		-5.4939	-5.7572
2016-01-09	03:59:00	-4.8769	-5.8856	-5.7228	-6.13			-4.8346		-5.4939	-5.7572
2016-01-09	05:59:00	-4.814	-5.8226	-5.6599	-6.13			-4.8346		-5.4939	-5.6944
2016-01-09	07:59:00	-4.7512	-5.8226	-5.5971	-6.13			-4.8346		-5.4939	-5.6315
2016-01-09	09:59:00	-4.6883	-5.8226	-5.5971	-6.13			-4.7086		-5.4939	-5.6315
2016-01-09	11:59:00	-4.6255	-5.6966	-5.4714	-6.0043			-4.3308		-5.3048	-5.5686
2016-01-09	13:59:00	-4.4998	-5.5705	-5.2829	-5.8158			-4.0789		-5.1157	-5.5057
2016-01-09	15:59:00	-4.437	-5.5075	-5.2829	-5.8158			-4.0159		-5.1157	-5.5057
2016-01-09	17:59:00	-4.437	-5.5705	-5.3457	-5.8786			-4.2048		-5.1787	-5.4429
2016-01-09	19:59:00	-4.437	-5.6966	-5.5343	-5.9415			-4.3937		-5.2417	-5.38
2016-01-09	21:59:00	-4.437	-5.7596	-5.5971	-5.9415			-4.5827		-5.2417	-5.38
2016-01-09	23:59:00	-4.437	-5.8856	-5.7856	-6.0043			-4.9605		-5.2417	-5.3171
2016-01-10	01:59:00	-4.437	-6.2008	-6.037	-6.13			-5.4644		-5.2417	-5.3171
2016-01-10	03:59:00	-4.437	-6.3898	-6.2885	-6.1929			-6.0314		-5.2417	-5.2543
2016-01-10	05:59:00	-4.437	-6.4529	-6.3513	-6.1929			-6.2204		-5.2417	-5.2543
2016-01-10	07:59:00	-4.437	-6.5789	-6.5399	-6.3186			-6.5354		-5.2417	-5.2543
2016-01-10	09:59:00	-4.437	-6.642	-6.6027	-6.3186			-6.4724		-5.3048	-5.1914
2016-01-10	11:59:00	-4.437	-6.5159	-6.5399	-6.3186			-5.6534		-5.3048	-5.1914
2016-01-10	13:59:00	-4.437	-6.3898	-6.2885	-6.2557			-5.0235		-5.3048	-5.1914
2016-01-10	15:59:00	-4.3742	-6.2008	-6.0999	-6.13			-4.2678		-5.3048	-5.1914
2016-01-10	17:59:00	-4.3742	-6.2008	-6.0999	-6.1929			-5.0235		-5.3048	-5.1914
2016-01-10	19:59:00	-4.437	-6.2008	-6.1627	-6.1929			-5.4644		-5.3048	-5.1914
2016-01-10	21:59:00	-4.4998	-6.2008	-6.1627	-6.1929			-5.5904		-5.3048	-5.1914
2016-01-10	23:59:00	-4.4998	-6.1377	-6.0999	-6.13			-5.5274		-5.3048	-5.1914
2016-01-11	01:59:00	-4.5627	-6.1377	-6.0999	-6.13			-5.5274		-5.3048	-5.1285
2016-01-11	03:59:00	-4.6255	-6.0747	-6.0999	-6.1929			-5.5904		-5.3048	-5.1285
2016-01-11	05:59:00	-4.6255	-6.0747	-6.0999	-6.1929			-5.5904		-5.3048	-5.1285
2016-01-11	07:59:00	-4.6255	-6.0747	-6.037	-6.13			-5.4644		-5.2417	-5.1285
2016-01-11	09:59:00	-4.6255	-5.9487	-5.9113	-6.0043			-5.2125		-5.2417	-5.1285
2016-01-11	11:59:00	-4.5627	-5.8226	-5.7228	-5.8786			-4.9605		-5.2417	-5.1285
2016-01-11	13:59:00	-4.4998	-5.7596	-5.6599	-5.8786			-4.8975		-5.2417	-5.0657
2016-01-11	15:59:00	-4.4998	-5.9487	-5.8485	-6.0043			-4.9605		-5.1787	-5.0657
2016-01-11	17:59:00	-4.4998	-6.4529	-6.3513	-6.3186			-5.8424		-5.1787	-5.0657
2016-01-11	19:59:00	-4.7512	-6.8941	-6.8542	-6.6958			-6.7244		-5.1157	-5.0657
2016-01-11	21:59:00	-5.0025	-7.3354	-7.3571	-7.0729			-7.4176		-5.1157	-5.0657
2016-01-11	23:59:00	-5.1911	-7.5246	-7.6714	-7.2615			-7.7327		-5.1157	-5.0657
2016-01-12	01:59:00	-5.3796	-7.8399	-7.9229	-7.4501			-8.0478		-5.1157	-5.0657
2016-01-12	03:59:00	-5.5681	-8.0921	-8.1744	-7.7016			-8.426		-5.1157	-5.0657
2016-01-12	05:59:00	-5.6938	-8.2813	-8.363	-7.8274			-8.6782		-5.1787	-5.0657
2016-01-12	07:59:00	-5.8195	-8.4074	-8.4888	-7.8903			-8.8673		-5.1787	-5.1285
2016-01-12	09:59:00	-5.9452	-8.4705	-8.4888	-7.9531			-8.9934		-5.2417	-5.1914
2016-01-12	11:59:00	-5.9452	-8.4705	-8.4888	-7.9531			-8.8673		-5.3048	-5.1914
2016-01-12	13:59:00	-6.0081	-8.5335	-8.4888	-7.9531			-8.6151		-5.3678	-5.2543
2016-01-12	15:59:00	-6.0081	-8.5966	-8.4888	-7.9531			-8.4891		-5.3678	-5.2543
2016-01-12	17:59:00	-6.1338	-8.6597	-8.5517	-8.016			-8.7412		-5.4308	-5.3171
2016-01-12	19:59:00	-6.1966	-8.7858	-8.6774	-8.2046			-9.2456		-5.4308	-5.3171
2016-01-12	21:59:00	-6.3852	-8.975	-8.929	-8.4562			-9.75		-5.4939	-5.38
2016-01-12	23:59:00	-6.5109	-9.1643	-9.0547	-8.5819			-10.0022		-5.5569	-5.38
2016-01-13	01:59:00	-6.6366	-9.2273	-9.1176	-8.6448			-10.1914		-5.5569	-5.4429
2016-01-13	03:59:00	-6.6995	-9.2904	-9.1805	-8.7706			-10.2545		-5.6199	-5.5057
2016-01-13	05:59:00	-6.8252	-9.6058	-9.4321	-9.085			-10.8852		-5.683	-5.5057
2016-01-13	07:59:00	-7.0138	-9.7951	-9.6207	-9.2108			-11.1375		-5.683	-5.5686
2016-01-13	09:59:00	-7.1395	-9.9213	-9.6836	-9.3366			-11.2637		-5.746	-5.5686
2016-01-13	11:59:00	-7.1395	-9.9213	-9.6836	-9.3366			-11.0113		-5.809	-5.6315
2016-01-13	13:59:00	-7.2024	-9.8582	-9.6836	-9.2737			-10.759		-5.8721	-5.6944
2016-01-13	15:59:00	-7.2652	-9.8582	-9.6207	-9.2737			-10.5698		-5.8721	-5.7572
2016-01-13	17:59:00	-7.2652	-9.7951	-9.5578	-9.2737			-10.6329		-5.9351	-5.7572
2016-01-13	19:59:00	-7.3281	-9.8582	-9.6207	-9.3366			-11.0113		-5.9351	-5.8201
2016-01-13	21:59:00	-7.391	-9.8582	-9.6836	-9.3994			-11.3267		-5.9981	-5.8201
2016-01-13	23:59:00	-7.5796	-9.8582	-9.6836	-9.4623			-11.7053		-5.9981	-5.883
2016-01-14	01:59:00	-7.8311	-9.9213	-9.8094	-9.651			-12.3362		-6.0612	-5.883
2016-01-14	03:59:00	-8.0826	-10.0475	-9.9981	-9.9026			-12.9041		-6.0612	-5.9459
2016-01-14	05:59:00	-8.3341	-10.2998	-10.2497	-10.1542			-13.2828		-6.1242	-6.0087
2016-01-14	07:59:00	-8.5227	-10.426	-10.3755	-10.28			-13.4721		-6.1873	-6.0087
2016-01-14	09:59:00	-8.6485	-10.426	-10.5013	-10.3429			-13.1565		-6.2503	-6.0716
2016-01-14	11:59:00	-8.5856	-10.2998	-10.3755	-10.2171			-11.8945		-6.3134	-6.0716
2016-01-14	13:59:00	-8.3341	-10.1105	-10.1868	-10.0913			-9.4978		-6.3764	-6.1345
2016-01-14	15:59:00	-8.1454	-9.9213	-9.9981	-9.9655			-8.6151		-6.3764	-6.1974
2016-01-14	17:59:00	-8.0826	-9.732	-9.7465	-9.7139			-9.2456		-6.4395	-6.1974
2016-01-14	19:59:00	-8.0197	-9.5427	-9.5578	-9.5252			-9.6239		-6.4395	-6.1974
2016-01-14	21:59:00	-7.9568	-9.5427	-9.4949	-9.5252			-9.9392		-6.4395	-6.2603
2016-01-14	23:59:00	-7.9568	-9.6058	-9.4949	-9.5252			-10.2545		-6.4395	-6.2603
2016-01-15	01:59:00	-8.0197	-9.8582	-9.6836	-9.7139			-10.696		-6.3764	-6.2603
2016-01-15	03:59:00	-8.1454	-10.2367	-9.9981	-10.1542			-11.6422		-6.3764	-6.3231
2016-01-15	05:59:00	-8.3969	-10.4891	-10.2497	-10.3429			-12.0838		-6.3764	-6.3231
2016-01-15	07:59:00	-8.5856	-10.7415	-10.4384	-10.5945			-12.4624		-6.4395	-6.3231
2016-01-15	09:59:00	-8.7742	-11.1202	-10.8158	-11.0978			-12.9672		-6.4395	-6.386
2016-01-15	11:59:00	-8.9	-11.3726	-11.1303	-11.2236			-12.841		-6.4395	-6.386
2016-01-15	13:59:00	-8.9629	-11.562	-11.3191	-11.3494			-12.841		-6.5025	-6.4489
2016-01-15	15:59:00	-9.0887	-11.7513	-11.5078	-11.5382			-13.1565		-6.5656	-6.4489
2016-01-15	17:59:00	-9.2773	-12.0038	-11.8224	-11.9157			-13.7246		-6.5656	-6.5118
2016-01-15	19:59:00	-9.4031	-12.1932	-12.0111	-12.1044			-14.1664		-6.6286	-6.5747
2016-01-15	21:59:00	-9.5289	-12.2563	-12.1999	-12.2303			-14.3558		-6.6917	-6.6376
2016-01-15	23:59:00	-9.5289	-12.3195	-12.2628	-12.3561			-14.3558		-6.7547	-6.7004
2016-01-16	01:59:00	-9.5918	-12.3195	-12.2628	-12.3561			-14.2927		-6.8178	-6.7633
2016-01-16	03:59:00	-9.6547	-12.3195	-12.2628	-12.3561			-14.1664		-6.8808	-6.8262
2016-01-16	05:59:00	-9.6547	-12.2563	-12.1999	-12.3561			-13.7877		-6.8808	-6.8891
2016-01-16	07:59:00	-9.5918	-12.067	-12.137	-12.1674			-13.3459		-6.9439	-6.952
2016-01-16	09:59:00	-9.4031	-11.8145	-11.8853	-11.7898			-12.9041		-6.9439	-6.952
2016-01-16	11:59:00	-9.1515	-11.4989	-11.5707	-11.4753			-12.5886		-7.007	-7.0149
2016-01-16	13:59:00	-9.0258	-11.4357	-11.3191	-11.2236			-12.21		-7.007	-7.0778
2016-01-16	15:59:00	-8.8371	-11.562	-11.1932	-11.0978			-11.9576		-7.007	-7.0778
2016-01-16	17:59:00	-8.7114	-11.6882	-11.1932	-11.0978			-11.7053		-7.007	-7.1407
2016-01-16	19:59:00	-8.5856	-11.8145	-11.3191	-11.1607			-11.516		-7.007	-7.1407
2016-01-16	21:59:00	-8.5227	-11.9407	-11.382	-11.4753			-11.3267		-7.007	-7.1407
2016-01-16	23:59:00	-8.4598	-12.067	-11.5707	-11.7898			-11.2006		-7.007	-7.2036
2016-01-17	01:59:00	-8.3969	-12.1932	-11.6965	-12.1044			-11.0113		-7.07	-7.2036
2016-01-17	03:59:00	-8.3341	-12.3826	-11.8853	-12.4191			-10.8852		-7.07	-7.2036
2016-01-17	05:59:00	-8.3341	-12.5089	-12.0111	-12.6708			-10.759		-7.07	-7.2664
2016-01-17	07:59:00	-8.3341	-12.5089	-12.137	-12.9225			-10.6329		-7.07	-7.2664
2016-01-17	09:59:00	-8.2712	-12.5089	-12.1999	-13.0484			-10.5698		-7.1331	-7.3293
2016-01-17	11:59:00	-8.2712	-12.4457	-12.1999	-13.0484			-10.4437		-7.1331	-7.3293
2016-01-17	13:59:00	-8.2083	-12.3826	-12.074	-12.7966			-10.3176		-7.1961	-7.3922
2016-01-17	15:59:00	-8.2083	-12.3195	-12.074	-12.6078			-10.2545		-7.2592	-7.3922
2016-01-17	17:59:00	-8.2083	-12.3826	-12.137	-12.9225			-10.1284		-7.2592	-7.4551
2016-01-17	19:59:00	-8.2083	-12.4457	-12.3257	-13.1742			-10.0653		-7.2592	-7.4551
2016-01-17	21:59:00	-8.2083	-12.5089	-12.4516	-13.3001			-10.0022		-7.3223	-7.518
2016-01-17	23:59:00	-8.2083	-12.5089	-12.4516	-13.363			-9.9392		-7.3223	-7.518
2016-01-18	01:59:00	-8.2083	-12.3826	-12.4516	-13.3001			-9.8131		-7.3853	-7.5809
2016-01-18	03:59:00	-8.2712	-12.3195	-12.5145	-13.4889			-9.75		-7.4484	-7.5809
2016-01-18	05:59:00	-8.2712	-12.2563	-12.5774	-13.6148			-9.6869		-7.4484	-7.6438
2016-01-18	07:59:00	-8.3341	-12.1932	-12.6403	-13.7407			-9.6239		-7.5115	-7.6438
2016-01-18	09:59:00	-8.3341	-12.067	-12.5774	-13.8665			-9.5608		-7.5745	-7.7067
2016-01-18	11:59:00	-8.3341	-11.9407	-12.4516	-13.8036			-9.4347		-7.5745	-7.7696
2016-01-18	13:59:00	-8.3341	-11.7513	-12.3257	-13.6777			-9.3717		-7.6376	-7.7696
2016-01-18	15:59:00	-8.3341	-11.562	-12.074	-13.4889			-9.2456		-7.7007	-7.7696
2016-01-18	17:59:00	-8.3341	-11.562	-11.9482	-13.5518			-9.1825		-7.7007	-7.8325
2016-01-18	19:59:00	-8.3341	-11.6251	-12.0111	-13.6777			-9.1195		-7.7637	-7.8325
2016-01-18	21:59:00	-8.3341	-11.6251	-12.074	-13.8036			-9.0564		-7.7637	-7.8325
2016-01-18	23:59:00	-8.3341	-11.6882	-12.137	-13.9295			-8.9934		-7.7637	-7.8954
2016-01-19	01:59:00	-8.2712	-11.6882	-12.1999	-13.9295			-8.9934		-7.8268	-7.8954
2016-01-19	03:59:00	-8.2712	-11.8145	-12.2628	-13.9924			-8.9934		-7.8268	-7.8954
2016-01-19	05:59:00	-8.2712	-11.9407	-12.2628	-13.8665			-8.9934		-7.8268	-7.8954
2016-01-19	07:59:00	-8.2083	-11.8776	-12.137	-13.6148			-8.9303		-7.8899	-7.9583
2016-01-19	09:59:00	-8.2083	-11.8145	-12.0111	-13.3001			-8.9303		-7.8268	-7.9583
2016-01-19	11:59:00	-8.2083	-11.6251	-11.6965	-12.7966			-8.8673		-7.8268	-7.9583
2016-01-19	13:59:00	-8.2083	-11.3726	-11.382	-12.2303			-8.8043		-7.8268	-7.9583
2016-01-19	15:59:00	-8.1454	-11.1833	-11.0674	-11.9786			-8.6782		-7.7637	-8.0212
2016-01-19	17:59:00	-8.1454	-11.1202	-11.0045	-11.9786			-8.6782		-7.7007	-8.0212
2016-01-19	19:59:00	-8.1454	-11.0571	-10.9416	-11.9157			-8.7412		-7.6376	-8.0212
2016-01-19	21:59:00	-8.0826	-10.9309	-10.8787	-11.7898			-8.8043		-7.6376	-8.0212
2016-01-19	23:59:00	-8.0826	-10.8046	-10.8158	-11.7269			-8.8673		-7.5745	-8.0212
2016-01-20	01:59:00	-8.0197	-10.7415	-10.69	-11.6011			-8.8673		-7.5745	-7.9583
2016-01-20	03:59:00	-8.0197	-10.6784	-10.6271	-11.5382			-8.9303		-7.5115	-7.9583
2016-01-20	05:59:00	-7.9568	-10.5522	-10.5642	-11.4753			-8.9303		-7.5115	-7.9583
2016-01-20	07:59:00	-7.9568	-10.4891	-10.5013	-11.4123			-8.9303		-7.4484	-7.9583
2016-01-20	09:59:00	-7.9568	-10.4891	-10.4384	-11.3494			-8.9303		-7.3853	-7.9583
2016-01-20	11:59:00	-7.8939	-10.3629	-10.3126	-11.1607			-8.8673		-7.3853	-7.9583
2016-01-20	13:59:00	-7.8939	-10.3629	-10.1868	-11.0978			-8.6782		-7.3223	-7.8954
2016-01-20	15:59:00	-7.8311	-10.2998	-10.1239	-11.0349			-8.363		-7.3223	-7.8954
2016-01-20	17:59:00	-7.8311	-10.2998	-10.1239	-11.0978			-8.1739		-7.2592	-7.8954
2016-01-20	19:59:00	-7.8311	-10.3629	-10.1868	-11.2865			-8.4891		-7.2592	-7.8954
2016-01-20	21:59:00	-7.7682	-10.426	-10.3126	-11.4123			-8.8043		-7.2592	-7.8325
2016-01-20	23:59:00	-7.7682	-10.4891	-10.3755	-11.4123			-8.9934		-7.2592	-7.8325
2016-01-21	01:59:00	-7.7682	-10.4891	-10.4384	-11.5382			-9.0564		-7.2592	-7.8325
2016-01-21	03:59:00	-7.7682	-10.6153	-10.5013	-11.664			-9.1825		-7.2592	-7.8325
2016-01-21	05:59:00	-7.7682	-10.6784	-10.6271	-11.9786			-9.3717		-7.2592	-7.8325
2016-01-21	07:59:00	-7.7053	-10.7415	-10.7529	-12.2303			-9.4978		-7.2592	-7.8325
2016-01-21	09:59:00	-7.7053	-10.7415	-10.8158	-12.2932			-9.5608		-7.2592	-7.8325
2016-01-21	11:59:00	-7.7053	-10.7415	-10.8787	-12.4191			-9.3086		-7.3223	-7.8325
2016-01-21	13:59:00	-7.7053	-10.7415	-10.8787	-12.3561			-8.0478		-7.3223	-7.8325
2016-01-21	15:59:00	-7.7053	-10.7415	-10.8158	-12.3561			-7.1025		-7.3223	-7.8325
2016-01-21	17:59:00	-7.6425	-10.7415	-10.8158	-12.4191			-7.1025		-7.3853	-7.8325
2016-01-21	19:59:00	-7.6425	-10.7415	-10.9416	-12.6708			-7.7957		-7.3853	-7.8325
2016-01-21	21:59:00	-7.6425	-10.8046	-11.0045	-12.7337			-8.426		-7.3853	-7.8325
2016-01-21	23:59:00	-7.5796	-10.8677	-11.1303	-12.8596			-8.9303		-7.4484	-7.8325
2016-01-22	01:59:00	-7.5796	-10.9309	-11.2561	-12.9225			-9.3086		-7.4484	-7.8954
2016-01-22	03:59:00	-7.5796	-10.994	-11.2561	-12.9225			-9.5608		-7.5115	-7.8954
2016-01-22	05:59:00	-7.5796	-11.0571	-11.3191	-12.8596			-9.75		-7.5115	-7.8954
2016-01-22	07:59:00	-7.5796	-11.0571	-11.3191	-12.8596			-9.9392		-7.5115	-7.8954
2016-01-22	09:59:00	-7.5796	-11.0571	-11.3191	-12.8596			-10.0022		-7.5745	-7.8954
2016-01-22	11:59:00	-7.5796	-11.0571	-11.2561	-12.6078			-8.8673		-7.5745	-7.9583
2016-01-22	13:59:00	-7.5796	-10.9309	-11.0674	-12.1044			-7.2915		-7.5745	-7.9583
2016-01-22	15:59:00	-7.5796	-10.7415	-10.69	-11.664			-6.2204		-7.5745	-7.9583
2016-01-22	17:59:00	-7.5796	-10.6784	-10.5642	-11.5382			-6.2204		-7.5745	-7.9583
2016-01-22	19:59:00	-7.5796	-10.6784	-10.6271	-11.664			-7.0395		-7.5745	-7.9583
2016-01-22	21:59:00	-7.5167	-10.6784	-10.69	-11.4753			-7.6697		-7.5115	-7.9583
2016-01-22	23:59:00	-7.5167	-10.6784	-10.69	-11.3494			-8.1109		-7.5115	-7.9583
2016-01-23	01:59:00	-7.5167	-10.6153	-10.6271	-11.0978			-8.363		-7.4484	-7.9583
2016-01-23	03:59:00	-7.5167	-10.426	-10.3755	-10.5945			-8.4891		-7.5115	-7.9583
2016-01-23	05:59:00	-7.5167	-9.6058	-9.4321	-9.4623			-8.2369		-7.4484	-7.9583
2016-01-23	07:59:00	-7.5167	-8.975	-8.7403	-8.7706			-7.8587		-7.3853	-7.9583
2016-01-23	09:59:00	-7.4538	-8.912	-8.6145	-8.9592			-7.6697		-7.2592	-7.9583
2016-01-23	11:59:00	-7.4538	-9.1012	-8.8032	-9.1479			-7.6697		-7.1961	-7.9583
2016-01-23	13:59:00	-7.4538	-9.2273	-8.8661	-9.2737			-7.6066		-7.1331	-7.8954
2016-01-23	15:59:00	-7.391	-9.3535	-8.9918	-9.3366			-7.5436		-7.07	-7.8954
2016-01-23	17:59:00	-7.391	-9.5427	-9.1805	-9.5881			-7.6697		-7.07	-7.8325
2016-01-23	19:59:00	-7.3281	-9.7951	-9.5578	-9.9655			-7.9848		-7.07	-7.8325
2016-01-23	21:59:00	-7.3281	-9.9844	-9.9352	-10.4058			-8.4891		-7.1331	-7.7696
2016-01-23	23:59:00	-7.3281	-10.1736	-10.2497	-10.7203			-9.0564		-7.1961	-7.7696
2016-01-24	01:59:00	-7.3281	-10.2998	-10.3755	-10.972			-9.4347		-7.3223	-7.7696
2016-01-24	03:59:00	-7.3281	-10.3629	-10.5013	-11.0978			-9.6239		-7.3853	-7.7696
2016-01-24	05:59:00	-7.3281	-10.2367	-10.4384	-11.0349			-9.75		-7.4484	-7.7696
2016-01-24	07:59:00	-7.3281	-10.2367	-10.4384	-11.1607			-9.8131		-7.5115	-7.7696
2016-01-24	09:59:00	-7.3281	-10.1105	-10.2497	-10.909			-9.6869		-7.5745	-7.7696
2016-01-24	11:59:00	-7.3281	-9.6689	-9.5578	-10.0913			-8.8043		-7.5745	-7.7696
2016-01-24	13:59:00	-7.3281	-9.2904	-8.8661	-9.2108			-7.7957		-7.4484	-7.7696
2016-01-24	15:59:00	-7.3281	-8.8489	-8.1744	-8.519			-6.8504		-7.3853	-7.7696
2016-01-24	17:59:00	-7.3281	-8.5966	-7.9229	-8.3933			-7.1025		-7.2592	-7.7696
2016-01-24	19:59:00	-7.3281	-8.5966	-8.0487	-8.519			-7.4176		-7.2592	-7.7067
2016-01-24	21:59:00	-7.2652	-7.966	-7.4199	-7.7645			-7.3545		-7.07	-7.7067
2016-01-24	23:59:00	-7.2652	-7.1463	-6.477	-6.9472			-6.9134		-6.7547	-7.6438
2016-01-25	01:59:00	-7.2024	-6.705	-6.037	-6.57			-6.4724		-6.4395	-7.6438
2016-01-25	03:59:00	-7.2024	-6.3898	-5.7228	-6.3186			-6.1574		-6.2503	-7.5809
2016-01-25	05:59:00	-7.1395	-6.1377	-5.4714	-6.0043			-5.9684		-6.0612	-7.518
2016-01-25	07:59:00	-7.1395	-5.8226	-5.1572	-5.6901			-5.7164		-5.809	-7.4551
2016-01-25	09:59:00	-7.0767	-5.6335	-4.9058	-5.5015			-5.4644		-5.6199	-7.3922
2016-01-25	11:59:00	-7.0767	-5.3185	-4.5288	-5.1244			-5.0865		-5.4308	-7.2664
2016-01-25	13:59:00	-7.0138	-5.3185	-4.5916	-5.1873			-3.5752		-5.3048	-7.2036
2016-01-25	15:59:00	-6.9509	-5.3185	-4.5288	-5.1244			-1.9386		-5.1787	-7.1407
2016-01-25	17:59:00	-6.8881	-5.3815	-4.6545	-5.3758			-1.8127		-5.1157	-7.0149
[truncated: 14,409 more rows]
