# Supplementary material for: Stability assessment of degrading permafrost rock slopes based on a coupled thermo-mechanical model
Source: Copernicus journal article supplement (doi:10.5194/esurf-2020-70), 2020-09-28
Supplement: Supplementary file 1 [file esurf-2020-70-supplement.zip › Suppl. material/Dataset S7. Dilatational wave_Lab_Table 3.xlsx]

## Sheet: saturated unfrozen
Sample	Thermal state	VD [km/s]	Poisson number
ZG3_1	saturated unfrozen	4.317	0.386009
ZG6_1		4.247	0.393956
ZG6_2		4.187	0.397882
ZG6_3		4.811	0.346896
ZG8_1		5.439	0.305963
ZG10_1		4.316	0.399053
ZG11_1		5.244	0.343966
ZG11_2		5.268	0.322821
ZG13_1		5.125	0.336996
ZG13_4		4.895	0.367019
ZG14_1		5.192	0.337911
ZG14_2		4.533	0.394855
ZG14_3		4.66	0.389218
ZG14_4		5.106	0.357044
ZG14_5		5.298	0.33486
ZG14_6		5.075	0.336034
ZG14_7		5.103	0.353116
ZG14_9		4.974	0.363943
ZG16_1		5.184	0.329953
ZG17_1		5.261	0.32503
ZG17_2		4.517	0.382391
ZG17_3		5.572	0.291862
ZG17_4		4.616	0.367029
ZG17_5		4.972	0.345078
ZG17_6		4.219	0.395853
ZG17_7		5.352	0.293898
ZG17_9		5.131	0.315922
ZG17_10		5.427	0.297101
ZG19_1		5.214	0.304056
ZG19_2		5.204	0.319846
Minimum		4.187	0.291862
Maximum		5.572	0.399053
Mean		4.94863	0.347852
Standard deviation		0.399524	0.033339

## Sheet: frozen
Sample	Thermal state	VD [km/s]	Poisson number
ZG3_1	frozen	5.582	0.321733
ZG6_1		5.575	0.321071
ZG6_2		5.648	0.321055
ZG6_3		5.709	0.319986
ZG8_1		5.522	0.328932
ZG10_1		5.558	0.312939
ZG11_1		5.495	0.329049
ZG11_2		5.529	0.324893
ZG13_1		5.562	0.32814
ZG13_4		5.622	0.321891
ZG14_1		5.563	0.312057
ZG14_2		5.513	0.327123
ZG14_3		5.552	0.323955
ZG14_4		5.583	0.319048
ZG14_5		5.609	0.319902
ZG14_6		5.572	0.31727
ZG14_7		5.534	0.311043
ZG14_9		5.6	0.327996
ZG16_1		5.573	0.329976
ZG17_1		5.559	0.333996
ZG17_2		5.588	0.33604
ZG17_3		5.585	0.316975
ZG17_4		5.536	0.325064
ZG17_5		5.562	0.318831
ZG17_6		5.573	0.336064
ZG17_7		5.502	0.321842
ZG17_9		5.492	0.338921
ZG17_10		5.506	0.327079
ZG19_1		5.519	0.333909
ZG19_2		5.564	0.331178
Minimum		5.492	0.311043
Maximum		5.709	0.338921
Mean		5.5629	0.324598
Standard deviation		0.0459872	0.00715302
