# Supplementary material for: Stability assessment of degrading permafrost rock slopes based on a coupled thermo-mechanical model
Source: Copernicus journal article supplement (doi:10.5194/esurf-2020-70), 2020-09-28
Supplement: Supplementary file 1 [file esurf-2020-70-supplement.zip › Suppl. material/Dataset S8. Uniaxial compressive strength_Lab_Table 3.xlsx]

## Sheet: unfrozen
Sample	Thermal state	σ1 (V) [MPa]	σ2 (V) [MPa]	σu [MPa]
ZG6_1	unfrozen	50	70	92.4
ZG6_3		50	90	107.2
ZG10_1		15	25	51.1
ZG11_2		25	40	62.2
ZG13_4		30	50	61.4
ZG14_2		40	100	126
ZG14_4		40	110	130.1
ZG14_6		30	60	94
ZG14_9		40	80	99.2
ZG17_3		30	55	84
ZG17_5		70	120	135.4
ZG17_7		40	60	71.7
ZG17_10		25	35	53.5
ZG19_2		40	70	105.9
Minimum		15	25	51.1
Maximum		70	120	135.4
Mean		37.5	68.9286	91.0071
Standard deviation		13.0589	27.3325	27.2727

## Sheet: frozen
Sample	Thermal state	σ1 (V) [MPa]	σ2 (V) [MPa]	σu [MPa]
ZG6_2	frozen	55	90	124.4
ZG8_1		35	60	66.6
ZG11_1		45	80	101.4
ZG13_1		35	85	99.8
ZG14_1		60	115	146.7
ZG14_3		45	105	116.8
ZG14_5		60	120	151.1
ZG14_7		60	100	136.1
ZG16_1		-	-	96.7
ZG17_2		30	40	109.2
ZG17_4		45	80	98
ZG17_6		40	80	115.4
ZG17_9		-	-	100.3
ZG19_1		15	30	59.8
Minimum		15	30	59.8
Maximum		60	120	151.1
Mean		43.75	82.0833	108.736
Standard deviation		13.2484	26.4936	25.3193
