# Supplementary material for: Stability assessment of degrading permafrost rock slopes based on a coupled thermo-mechanical model
Source: Copernicus journal article supplement (doi:10.5194/esurf-2020-70), 2020-09-28
Supplement: Supplementary file 1 [file esurf-2020-70-supplement.zip › Suppl. material/Dataset S9. Uniaxial tensile strength_Lab_Table 3.xlsx]

## Sheet: unfrozen
Sample		Fm [kN]	σt [MPa]
ZG3_B2	saturated unfrozen	14.39	7.9
ZG3_B4		20.89	10.3
ZG3_B6		14.38	7.4
ZG3_B8		11.28	5.7
ZG3_B10		13.45	7
ZG3_B12		8.24	4.3
ZG3_B14		11.14	5.8
ZG6_B2		13.82	7.1
ZG8_B2		15.86	8.7
ZG8_B4		15.99	8.3
ZG8_B6		11.63	5.7
ZG8_B8		13.47	7.1
ZG8_B10		18.25	9.3
ZG8_B12		14.31	6.9
ZG8_B14		19.95	10.3
ZG8_B16		19.05	9.8
ZG8_B18		14.16	7.3
ZG9_B2		11.17	6
ZG11_B1		11.34	5.8
ZG11_B3		9.4	4.7
ZG12_B2		6.47	3.4
ZG13_B2		14.28	7.5
ZG16_B1		10.26	5.3
ZG17_B1		23.22	11.7
ZG17_B2		11.21	6
ZG17_B4		9.89	4.6
ZG17_B6		13.56	7
ZG17_B8		19.24	9.7
ZG19_B3		19.83	9.4
ZG20_B2		14.93	7.1
	Min	6.47	3.4
	Max	23.22	11.7
	Mean	14.1687	7.23667
	Standard deviation	3.94805	1.97273

## Sheet: frozen
Sample		Fm [kN]	σt [MPa]
ZG3_B1	frozen	17.68	9.3
ZG3_B3		16.98	8.8
ZG3_B5		17.51	9.3
ZG3_B7		17.7	9.2
ZG3_B9		15.34	8
ZG3_B11		17.29	8.7
ZG3_B13		19.77	8.8
ZG6_B1		18.6	10
ZG8_B1		12.54	6.5
ZG8_B3		22.2	10.9
ZG8_B5		15.24	8.2
ZG8_B7		21.82	11.1
ZG8_B11		16.49	8.3
ZG8_B13		24.23	12.3
ZG8_B15		21.7	11.3
ZG8_B17		17.45	8.8
ZG9_B1		17.7	8.6
ZG9_B3		14.21	7.4
ZG10_B2		13.65	6.8
ZG11_B2		17.46	8.7
ZG12_B1		21.35	11.2
ZG13_B1		15.68	8.2
ZG13_B3		15.99	7.8
ZG16_B3		22.15	10.6
ZG17_B3		16.13	8.3
ZG17_B5		18.11	9.5
ZG17_B7		18.37	9.4
ZG17_B9		17.37	9.2
ZG19_B2		16.75	8.4
ZG20_B1		14.38	7
	Min	12.54	6.5
	Max	24.23	12.3
	Mean	17.728	9.02
	Standard deviation	2.74055	1.37147
