# Supplementary material for: Stability assessment of degrading permafrost rock slopes based on a coupled thermo-mechanical model
Source: Copernicus journal article supplement (doi:10.5194/esurf-2020-70), 2020-09-28
Supplement: Supplementary file 1 [file esurf-2020-70-supplement.zip › Suppl. material/Dataset S10. JCS and basic friction angle_Lab_Table 5.xlsx]

## Sheet: JCS
Schmidt-Hammer-Tests (N-Hammer)
	Rebound values
Sample	Rebound values R	Alpha	Normalisation with reference to horizontal direction	Upper 50% of the values	Mean value	Joint wall compressive strength after KATZ et al., 2000
WSK5 unten (sawn, unweathered and saturated, unfrozen)	51	0		56	54.0769	97.3563		Sample	Thermal state	JCS after Katz et al.,2000 (Mpa)	Mean JCS (MPa)	Rebound (upper 50% of the values)	Mittel Rückprall		State of weathering
	52			55			R: sawn/unweathered, saturated	WSK5 unten	unfrozen	97.3563	90.3508	54.0769	54.0769	52.967	unweathered
	52			55			R: sawn/unweathered, dry	?		83.3453		51.8571	51.8571
	53			55			r: weathered, dry	ZG5		86.4802	88.4017	52.3846	52.8252	52.6416	weathered
	53			54				ZG2		101.891		54.7273
	53			54				ZG1		80.5153		51.3636
	52			54			r: weathered, saturated	ZG5		84.7204		52.0909	52.0909
	52			54				ZG3	frozen	97.4	93.8434	54.0833	53.5417		weathered
	52			54				ZG5		90.2869		53
	49			53			R: sawn/unweathered, saturated	ZG05		94.1597	97.6722	53.6	54.1091		unweathered
	54			53				ZG03		103.855		55
	54			53				ZG18		95.0023		53.7273
	50			53
	53
	50
	52
	52
	52
	50
	54
	54
	55
	55
	56
	54
	55
	53
dry, unweathered und sawn, unfrozen	52	0		54	51.8571	83.3453
	54			53
	52			53
	52			52
	53			52
	52			52
	51			52
	51			52
	53			52
	49			51
	51			51
	52			51
	50			51
	27			50
	28
	52
	28
	50
	29
	51
	49
	50
	48
	51
	53
	52
	52
	48
ZG5, dry, unweathered, unfrozen	51	70	53	56	52.3846	86.4802
	52		54	54
	45		48	53
	46		48	53
	50		53	53
	47		49	53
	51		53	53
	54		56	52
	49		52	52
	43		46	51
	49		52	51
	51		53	51
	51		53	49
	51	20	51
	51		51
	42		42
	38		39
	46		46
	44		45
	42		42
	51		51
	46		46
ZG2, dry, weathered, unfrozen	52	90	55	57	54.7273	101.891
	50		53	56
	34		38	56
	35		38	56
	29		33	55
	48		51	54
	48		51	54
	29		33	54
	48		51	54
	51		54	53
	51		54	53
	54	60	56
	51		53
	54		56
	54		56
	52		54
	48		51
	55		57
	50		53
	45		47
	48		51
	52		54
ZG1, dry, weathered, unfrozen	54	85	57	58	51.3636	80.5153
	53		56	57
	43		46	56
	51		54	54
	42		44	53
	21		25	51
	40		43	49
	44		47	49
	33		37	47
	32		35	46
	26		29	45
	48		51
	46		49
	41		44
	34		38
	38		42
	27		31
	46		49
	41		44
	56		58
	50		53
	42		45
ZG5, saturated, unfrozen, weathered	50	70	52	53	52.0909	84.7204
	43		46	53
	52		53	53
	50		52	53
	52		53	52
	51		53	52
	48		51	52
	45		47	52
	49		51	51
	37		40	51
	40		42	51
	49	20	49
	52		52
	46		46
	53		53
	41		41
	52		52
	42		42
	44		44
	44		44
	48		48
	51		51
ZG5, saturated, frozen, weathered	53	70	55	57	53	90.2869
	46		48	55
	53		55	55
	52		54	54
	51		53	54
	30		33	53
	55		57	52
	48		51	51
	50		52	51
	30		33	51
	46		48	50
	40	20	40
	48		48
	49		49
	40		40
	54		54
	28		28
	50		50
	51		51
	50		50
	51		51
	49		49
ZG05, saturated, frozen, sawn	53	0		56	53.6	94.1597
	53			55
	52			54
	53			53
	53			53
	54			53
	53			53
	52			53
	51			53
	53			53
	53
	52
	53
	53
	55
	51
	56
	53
	53
ZG03, saturated, frozen, sawn	56	0		57	55	103.855
	57			56
	54			56
	54			56
	53			55
	56			55
	54			54
	54			54
	55			54
	55			54
	56			54
	51
	54
	53
	54
	52
	52
	51
	53
	54
	53
	50
ZG18, saturated, frozen, sawn	53	0		56	53.7273	95.0023
	53			55
	53			54
	51			54
	53			54
	51			53
	52			53
	54			53
	53			53
	56			53
	52			53
	52
	52
	51
	53
	53
	52
	54
	52
	52
	55
	54
ZG3, saturated, frozen, weathered	50	30	51	57	54.0833	97.4
	56		56	57
	54		55	56
	57		57	56
	52		52	56
	54		55	55
	55		56	55
	57		57	53
	48	70	51	51
	50		52	51
	54		56	51
	48		51	51
	30		51
	45		47
	44		46
	38		41
	47	30	48
	52		53
	49		50
	44		45
	48		49
	50		51
	44		45
	44		45

## Sheet: Basic friction angle
Tilt Test
Rock type: Wetterstein limestone, Zugspitze crestline, Cylinders with 15cm diameter
Basic friction angle (°)
unfrozen	frozen
27	40
25	32.5
27	46
22	37
22	32
26	33.5
27	35
30	38
26	39
26	36
22	43
26	41
39	36.5
38	37
31	40
32	33
36	27
34	43
39	45
41	33
29	38
34	33
32	32
33	44
31	43
26	40
29	33.5
32	36
35	35
27	40
30.1333	43
	32
	46
	37
	39
	42.5
	35
	33
	33.5
	38
	32
	41
	40
	39
	38
	39
	45
	44
	46
	41
	42.5
	45
	32.5
	39
	37
	42
	38
	40
	38.3103
