# Supplementary material for: Stability assessment of degrading permafrost rock slopes based on a coupled thermo-mechanical model
Source: Copernicus journal article supplement (doi:10.5194/esurf-2020-70), 2020-09-28
Supplement: Supplementary file 1 [file esurf-2020-70-supplement.zip › Suppl. material/Dataset S11. JRC_Zugspitze crest_Table 2.xlsx]

## Sheet: Conclusion
JRC
	d(x) = 5 mm
	Joint sets
Profiles	K1	K2	K3	K4
A				0.37
B				3.67
C	2.4
D	7.13
E		6.08
F		8.04
G			8.63
H		6.23
I				1.79
J	5.76
K				9.66
L	4.74
M	7.5
N				6.54
Mean	5.506	6.78333	8.63	4.406
Mean absolute deviation (MAD)	1.5488	0.837778	0	2.9552
Standard deviation	1.83913	0.890705	0	3.34164
Mean all	5.61

## Sheet: K1_Profiles C and D
Analysis JRC Profiles C and D (dx = 5 mm; Barton-Comb)
	Section C, 1, K1		Section C, 2, K1		Section C, 3, K1		Section C, 4, K1		Section C, 5, K1		Section D, 1, K1		Section D, 2, K1		Section D, 3, K1		Section D, 4, K1		Section D, 5, K1
x absolute (5 mm)	y absolute 1	dy (5 mm) 1	y absolute 2	dy (5 mm) 2	y absolute 3	dy (5 mm) 3	y absolute 4	dy (5 mm) 4	y absolute 5	dy (5 mm) 5	y absolute 6	dy (5 mm) 6	y absolute 7	dy (5 mm) 7	y absolute 8	dy (5 mm) 8	y absolute 9	dy (5 mm) 9	y absolute 10	dy (5 mm) 10
0	0	−	11	−	3		2	−	3.5	−	8	−	3	−	4	−	1	−	5	−
5	0.5	0.25	10.5	0.25	3	0	1.5	0.25	3	0.25	7	1	3	0	4	0	1.5	0.25	5	0
10	1.5	1	10	0.25	6	9	1	0.25	2.5	0.25	7	0	4	1	3.5	0.25	2	0.25	6	1
15	2.5	1	10	0	6.5	0.25	0.5	0.25	1	2.25	8	1	5	1	4	0.25	2	0	6.5	0.25
20	4	2.25	9.5	0.25	6	0.25	1	0.25	0.5	0.25	7.5	0.25	4.5	0.25	4	0	1	1	7	0.25
25	4	0	9.5	0	6	0	1.5	0.25	0.5	0	7	0.25	4.5	0	5	1	0	1	7	0
30	4	0	10.5	1	6	0	1	0.25	1.5	1	6.5	0.25	4.5	0	4	1	1	1	7.5	0.25
35	4	0	10.5	0	6	0	1	0	1	0.25	6	0.25	4	0.25	4	0	1	0	8	0.25
40	4	0	10.5	0	6	0	0.5	0.25	0.5	0.25	5	1	3.5	0.25	5	1	1	0	8.5	0.25
45	4	0	10.5	0	5	1	1.5	1	1.5	1	4.5	0.25	3.5	0	5.5	0.25	3	4	9	0.25
50	3.5	0.25	10.5	0	4.5	0.25	1	0.25	2	0.25	4	0.25	4	0.25	5.5	0	5	4	8	1
55	3.5	0	9.5	1	4	0.25	1.5	0.25	2	0	3.5	0.25	4.5	0.25	6	0.25	5	0	7.5	0.25
60	3.5	0	10	0.25	4.5	0.25	1.5	0	2	0	3.5	0	4.5	0	6	0	7	4	7	0.25
65	3.5	0	9.5	0.25	4	0.25	1.5	0	1.5	0.25	4	0.25	4	0.25	6	0	9.5	6.25	6	1
70	3.5	0	8.5	1	3	1	1	0.25	0.5	1	4	0	4.5	0.25	6	0	10	0.25	5.5	0.25
75	4	0.25	8	0.25	3	0	0	1	0	0.25	4	0	5	0.25	6.5	0.25	9	1	3	6.25
80	4	0	8	0	3	0	1.5	2.25	0	0	4	0	6	1	7	0.25	9.5	0.25	1	4
85	5	1	8	0	2	1	2.5	1	0.5	0.25	4	0	7	1	7	0	11.5	4	1	0
90	6	1	7.5	0.25	2	0	3	0.25	2	2.25	4	0	7	0	7	0	10.5	1	1	0
95	6	0	8	0.25	2	0	3	0	1.5	0.25	5.5	2.25	7	0	8	1	11.5	1	1	0
100	6	0	7.5	0.25	3	1	4	1	1.5	0	6	0.25	6.5	0.25	10	4	12.5	1	1.5	0.25
105	7	1	8.5	1	3	0	3.5	0.25	1	0.25	6.5	0.25	6	0.25	10.5	0.25	13	0.25	2	0.25
110	7	0	9	0.25	3.5	0.25	3.5	0	1.5	0.25	7	0.25	5.5	0.25	10	0.25	13	0	2	0
115	6	1	9	0	4.5	1	4	0.25	1	0.25	6.5	0.25	5	0.25	8	4	13	0	2.5	0.25
120	6	0	9	0	5	0.25	3.5	0.25	1	0	7	0.25	5.5	0.25	7.5	0.25	12.5	0.25	3.5	1
125	6	0	9	0	5	0	2.5	1	1	0	7.5	0.25	6	0.25	7.5	0	13.5	1	4.5	1
130	5	1	9	0	5	0	2	0.25	1.5	0.25	8.5	1	6.5	0.25	8	0.25	14	0.25	6	2.25
135	4.5	0.25	8.5	0.25	5	0	0.5	2.25	1.5	0	9.5	1	7	0.25	8	0	13	1	7	1
140	4	0.25	8.5	0	6	1	0	0.25	2	0.25	9	0.25	7.5	0.25	8	0	13.5	0.25	8.5	2.25
145	4	0	8	0.25	6	0	0.5	0.25	2	0	9	0	7.5	0	8	0	9	20.25	10.5	4
150	3.5	0.25	8	0	6.5	0.25	0.5	0	2	0	7	4	7.5	0	7.5	0.25	9	0	11.5	1
155	3.5	0	7.5	0.25	6.5	0	0.5	0	2	0	7	0	7.5	0	8	0.25	9	0	12.5	1
160	3.5	0	8	0.25	6.5	0	1	0.25	2	0	7	0	8	0.25	8	0	9	0	12.5	0
165	3	0.25	8	0	6.5	0	3	4	2.5	0.25	8	1	7	1	8	0	10	1	12.5	0
170	3	0	8	0	6	0.25	3.5	0.25	2.5	0	8	0	6.5	0.25	8.5	0.25	10	0	11.5	1
175	3.5	0.25	8	0	5.5	0.25	3	0.25	2	0.25	7.5	0.25	5	2.25	9.5	1	10	0	11	0.25
180	3.5	0	8	0	4	2.25	3.5	0.25	2	0	8	0.25	5	0	11	2.25	10	0	11	0
185	3	0.25	8	0	3	1	5	2.25	2.5	0.25	8	0	5	0	10.5	0.25	10	0	11.5	0.25
190	3	0	8	0	2	1	6	1	2	0.25	8	0	4	1	11	0.25	10	0	11	0.25
195	3.5	0.25	8.5	0.25	1	1	6.5	0.25	2	0	7	1	4	0	11.5	0.25	9.5	0.25	10.5	0.25
200	3	0.25	8.5	0	0	1	6	0.25	2	0	6	1	5	1	11.5	0	9	0.25	10.5	0
205	4	1	9	0.25	0	0	7	1	2	0	6	0	5	0	11.5	0	8	1	9.5	1
210	4	0	8.5	0.25	1	1	8	1	2	0	5.5	0.25	4.5	0.25	11.5	0	7.5	0.25	9	0.25
215	4	0	8.5	0	3	4	8	0	2	0	5.5	0	5	0.25	11.5	0	7	0.25	8	1
220	4	0	8	0.25	3	0	8.5	0.25	2	0	5.5	0	4.5	0.25	10.5	1	6	1	7	1
225	4.5	0.25	7.5	0.25	4	1	7.5	1	1.5	0.25	5	0.25	5	0.25	10.5	0	4	4	6	1
230	4.5	0	7	0.25	4	0	8	0.25	1	0.25	5	0	5	0	9	2.25	2.5	2.25	5	1
235	4.5	0	7	0	5.5	2.25	7.5	0.25	1	0	5	0	5	0	6.5	6.25	1.5	1	5	0
240	4.5	0	6	1	6	0.25	7	0.25	0.5	0.25	4.5	0.25	4	1	4	6.25	1	0.25	4	1
245	4	0.25	6	0	6	0	6.5	0.25	0.5	0	4	0.25	3.5	0.25	3	1	0	1	3.5	0.25
250	3.5	0.25	5	1	6.5	0.25	6	0.25	0.5	0	4.5	0.25	2	2.25	2	1	1	1	2.5	1
255	3	0.25	3	4	6.5	0	6	0	0	0.25	4	0.25	1	1	1	1	0.5	0.25	2	0.25
260	3	0	3	0	6	0.25	5	1	0	0	0	16	0.5	0.25	1	0	1	0.25	1.5	0.25
	Sum dy:	14	Sum dy:	15	Sum dy:	33	Sum dy:	28	Sum dy:	13.25	Sum dy:	36	Sum dy:	19.75	Sum dy:	38	Summe dy:	67.5	Sum dy:	39.75
	m:	53	m:	53	m:	53	m:	53	m:	53	m:	53	m:	53	m:	53	m:	53	m:	53
	dx:	5	dx:	5	dx:	5	dx:	5	dx:	5	dx:	5	dx:	5	dx:	5	dx:	5	dx:	5
	Z2:	0.102791	Z2:	0.106399	Z2:	0.157815	Z2:	0.145369	Z2:	0.1	Z2:	0.164833	Z2:	0.122089	Z2:	0.169349	Z2:	0.225706	Z2:	0.173205
	JRC:	0.104311	JRC:	0.598405	JRC:	6.24496	JRC:	5.0683	JRC:	-0.29	JRC:	6.86809	JRC:	2.56856	JRC:	7.25529	JRC:	11.3699	JRC:	7.57773
										0
	JRC Mean K1, C		2.40319								JRC Mean K1, D		7.12791

## Sheet: K1_Profile J
Analysis JRC Profile J (dx = 5 mm; Barton-Comb)
	Section J, 1, K1		Section J, 2, K1		Section J, 3, K1
x absolute (5 mm)	y absolute 5	dy (5 mm) 5	y absolute 6	dy (5 mm) 6	y absolute 7	dy (5 mm) 7
0	8.5	−	9	−	12.5	−
5	7	2.25	8.5	0.25	12	0.25
10	6	1	7.5	1	11	1
15	5	1	7.5	0	9.5	2.25
20	4.5	0.25	8	0.25	9	0.25
25	4	0.25	8	0	10	1
30	5	1	8.5	0.25	11	1
35	5	0	8.5	0	11	0
40	4	1	8.5	0	11.5	0.25
45	3.5	0.25	8	0.25	10.5	1
50	2.5	1	7.5	0.25	9.5	1
55	1.5	1	6	2.25	8	2.25
60	1.5	0	6	0	6.5	2.25
65	0.5	1	4.5	2.25	6	0.25
70	0	0.25	4	0.25	5	1
75	0	0	4	0	5.5	0.25
80	0.5	0.25	3.5	0.25	6.5	1
85	0.5	0	2.5	1	6.5	0
90	0.5	0	2	0.25	6	0.25
95	1	0.25	2	0	5.5	0.25
100	1	0	1.5	0.25	6	0.25
105	1	0	1	0.25	5	1
110	1	0	1	0	5	0
115	1	0	0.5	0.25	5	0
120	2	1	0	0.25	3.5	2.25
125	2	0	0	0	3	0.25
130	2.5	0.25	0	0	2	1
135	3	0.25	0	0	2	0
140	3.5	0.25	0.5	0.25	2.5	0.25
145	4	0.25	1	0.25	3	0.25
150	4	0	1.5	0.25	1.5	2.25
155	4	0	0.5	1	1	0.25
160	4	0	0.5	0	1	0
165	5.5	2.25	1	0.25	1	0
170	5.5	0	2	1	0.5	0.25
175	5	0.25	2.5	0.25	1	0.25
180	4.5	0.25	3	0.25	0	1
185	4	0.25	3	0	0.5	0.25
190	3	1	4	1	1	0.25
195	2	1	4.5	0.25	2	1
200	1.5	0.25	5	0.25	1.5	0.25
205	1	0.25	5.5	0.25	2	0.25
210	0	1	6.5	1	3.5	2.25
215	0	0	7	0.25	4.5	1
220	0.5	0.25	7.5	0.25	6	2.25
225	1	0.25	8	0.25	7	1
230	1	0	9	1	8.5	2.25
235	1	0	9.5	0.25	11	6.25
240	1.5	0.25	10	0.25	13	4
245	3	2.25	10.5	0.25	15	4
250	4.5	2.25	10.5	0	16.5	2.25
255	6.5	4	10	0.25	17.5	1
260	7	0.25	10	0	19	2.25
	Sum dy:	28.75	Sum dy:	18.5	Sum dy:	55.25
	m:	53	m:	53	m:	53
	dx:	5	dx:	5	dx:	5
	Z2:	0.147303	Z2:	0.118162	Z2:	0.204201
	JRC:	5.2576	JRC:	2.10032	JRC:	9.93572
	JRC Mean K1		5.76455

## Sheet: K1_Profiles L and M
Analysis JRC Profiles L and M (dx = 5 mm; Barton-Comb)
	Section L, K1, 1		Section L, K1, 2		Section L, K1, 3		Section L, K1, 4		Section M, K1, 1		Section M, K1, 2		Section M, K1, 3
x absolute (5 mm)	y absolute 1	dy (5 mm) 1	y absolute 2	dy (5 mm) 2	y absolute 3	dy (5 mm) 3	y absolute 5	dy (5 mm) 5	y absolute 6	dy (5 mm) 6	y absolute 7	dy (5 mm) 7	y absolute 8	dy (5 mm) 8
0	4	−	6	−	5		1	−	1	−	10.5	−	0	−
5	3	1	6.5	0.25	4	1	0	1	1	0	9	2.25	1	1
10	3	0	7	0.25	4	0	4	16	1	0	8.5	0.25	2	1
15	3	0	8	1	4	0	5	1	0.5	0.25	8.5	0	3	1
20	2.5	0.25	8.5	0.25	4	0	6	1	0	0.25	7.5	1	4	1
25	2	0.25	9	0.25	3.5	0.25	5.5	0.25	1	1	7	0.25	5	1
30	1	1	9	0	3.5	0	5	0.25	3	4	7	0	6	1
35	0.5	0.25	9	0	4	0.25	5	0	3.5	0.25	6	1	7	1
40	0	0.25	9.5	0.25	4	0	5	0	4.5	1	6	0	8	1
45	0	0	9	0.25	4.5	0.25	6	1	5.5	1	6	0	9	1
50	0	0	9.5	0.25	4.5	0	6	0	6	0.25	6	0	10	1
55	0	0	9	0.25	5	0.25	6.5	0.25	6.5	0.25	6	0	11	1
60	0	0	9.5	0.25	4.5	0.25	6.5	0	6	0.25	5.5	0.25	11	0
65	0	0	9	0.25	3.5	1	6.5	0	5	1	4.5	1	10.5	0.25
70	0	0	9.5	0.25	4	0.25	6	0.25	3.5	2.25	4	0.25	11	0.25
75	0.5	0.25	9.5	0	3.5	0.25	6	0	2.5	1	3	1	11	0
80	1	0.25	9	0.25	3.5	0	6	0	2	0.25	2.5	0.25	11	0
85	1	0	8.5	0.25	3.5	0	5.5	0.25	2	0	1	2.25	11	0
90	1	0	8.5	0	0	12.25	5	0.25	2	0	0.5	0.25	11	0
95	1.5	0.25	7	2.25	1.5	2.25	5	0	1.5	0.25	0.5	0	11.5	0.25
100	2.5	1	6.5	0.25	2	0.25	4.5	0.25	1.5	0	0.5	0	12.5	1
105	3.5	1	5.5	1	2	0	4.5	0	2	0.25	0	0.25	12	0.25
110	4.5	1	5	0.25	2	0	4.5	0	2.5	0.25	0	0	13	1
115	6.5	4	4	1	2	0	4.5	0	2.5	0	1.5	2.25	13.5	0.25
120	7.5	1	3	1	2.5	0.25	4	0.25	2	0.25	1.5	0	14	0.25
125	7.5	0	2.5	0.25	3	0.25	4	0	2	0	2	0.25	14.5	0.25
130	9	2.25	2	0.25	3.5	0.25	4	0	2	0	3	1	15	0.25
135	8	1	2	0	3	0.25	3.5	0.25	2	0	3	0	15	0
140	8.5	0.25	1.5	0.25	3	0	3	0.25	2	0	3	0	15	0
145	9	0.25	2	0.25	3.5	0.25	2.5	0.25	1.5	0.25	4.5	2.25	14	1
150	9	0	2	0	4	0.25	2	0.25	1	0.25	5.5	1	14	0
155	9	0	2	0	3.5	0.25	0	4	2.5	2.25	6	0.25	12.5	2.25
160	9.5	0.25	1	1	3.5	0	0	0	3.5	1	8.5	6.25	11.5	1
165	10	0.25	1	0	3.5	0	3	9	5	2.25	9.5	1	11.5	0
170	10	0	1	0	3.5	0	4	1	6.5	2.25	13	12.25	11.5	0
175	10.5	0.25	1	0	3.5	0	5	1	6.5	0	15.5	6.25	11	0.25
180	10.5	0	0	1	4	0.25	6	1	5	2.25	16.5	1	10	1
185	11	0.25	0.5	0.25	4.5	0.25	9	9	4	1	17	0.25	9	1
190	11	0	0.5	0	5	0.25	10	1	4	0	19	4	8.5	0.25
195	11	0	0.5	0	5	0	10	0	4	0	19.5	0.25	8.5	0
200	10	1	0.5	0	5	0	9	1	4	0	20	0.25	8.5	0
205	10	0	1.5	1	5.5	0.25	9	0	3.5	0.25	21	1	8	0.25
210	9.5	0.25	2	0.25	6	0.25	8.5	0.25	3	0.25	21	0	7.5	0.25
215	10	0.25	2	0	7	1	8.5	0	3	0	21.5	0.25	6	2.25
220	9.5	0.25	2	0	7.5	0.25	7.5	1	2	1	22.5	1	5	1
225	9	0.25	2	0	8.5	1	6.5	1	2	0	22.5	0	3	4
230	9	0	2.5	0.25	9.5	1	5.5	1	2	0	22	0.25	3.5	0.25
235	8	1	2	0.25	10	0.25	4.5	1	1.5	0.25	22	0	4	0.25
240	8	0	2	0	10	0	4	0.25	1	0.25	22	0	1	9
245	8	0	2.5	0.25	10	0	3	1	0.5	0.25	21.5	0.25	0	1
250	7	1	2.5	0	11	1	3.5	0.25	0	0.25	21	0.25	0	0
255	7.5	0.25	2	0.25	12	1	3	0.25	0.5	0.25	20.5	0.25	0	0
260	6.5	1	2	0	12	0	2.5	0.25	1.5	1	20.5	0	0	0
	Sum dy:	21.75	Sum dy:	15.5	Sum dy:	27	Sum dy:	56.25	Sum dy:	29.25	Sum dy:	52	Sum dy:	40
	m:	53	m:	53	m:	53	m:	53	m:	53	m:	53	m:	53
	dx:	5	dx:	5	dx:	5	dx:	5	dx:	5	dx:	5	dx:	5
	Z2:	0.128121	Z2:	0.108158	Z2:	0.142749	Z2:	0.206041	Z2:	0.148578	Z2:	0.198104	Z2:	0.173749
	JRC:	3.25936	JRC:	0.83323	JRC:	4.80785	JRC:	10.0642	JRC:	5.38108	JRC:	9.50156	JRC:	7.62263
	JRC Mean K1, L		4.74116				JRC Mean K1, M		7.50175
	JRC Duchschnitt		#REF!

## Sheet: K2_Profiles E and F
Analysis JRC Profiles E and F (dx = 5 mm; Barton-Comb)
	Section E, 1, K2		Section E, 2, K2		Section E, 3, K2		Section F, 1, K2		Section F, 2, K2		Section F, 3, K2
x absolute (5 mm)	y absolute 1	dy (5 mm) 1	y absolute 2	dy (5 mm) 2	y absolute 3	dy (5 mm) 3	y absolute 5	dy (5 mm) 5	y absolute 6	dy (5 mm) 6	y absolute 7	dy (5 mm) 7
0	1	−	5.5	−	5		0	−	4	−	8.5	−
5	0.5	0.25	6	0.25	4.5	0.25	1.5	2.25	3.5	0.25	7	2.25
10	1	0.25	6.5	0.25	3.5	1	3	2.25	3.5	0	7	0
15	1	0	5	2.25	2.5	1	3	0	3	0.25	7	0
20	1	0	4.5	0.25	1.5	1	3	0	3	0	7.5	0.25
25	1	0	4.5	0	1	0.25	4	1	2.5	0.25	9	2.25
30	2.5	2.25	4	0.25	1	0	4.5	0.25	2	0.25	11	4
35	3.5	1	3.5	0.25	1	0	5	0.25	2	0	11.5	0.25
40	3.5	0	2.5	1	1	0	4.5	0.25	1.5	0.25	11	0.25
45	3.5	0	2	0.25	2	1	5	0.25	2	0.25	11	0
50	3	0.25	2	0	2	0	10	25	2	0	9.5	2.25
55	3	0	2	0	1	1	10	0	2	0	8.5	1
60	3	0	2	0	1	0	6	16	2.5	0.25	8.5	0
65	3	0	1	1	1	0	6	0	3.5	1	8	0.25
70	3	0	0	1	1.5	0.25	6	0	2.5	1	8	0
75	3	0	1	1	2	0.25	5	1	3	0.25	7	1
80	2	1	1.5	0.25	3	1	6	1	3	0	6.5	0.25
85	1	1	2	0.25	4	1	6	0	3.5	0.25	5	2.25
90	1	0	2	0	4.5	0.25	6	0	4	0.25	4	1
95	1	0	2	0	6	2.25	6	0	5	1	3	1
100	1	0	3	1	7.5	2.25	5.5	0.25	6.5	2.25	2	1
105	2	1	5	4		0	6	0.25	7	0.25	2	0
110	2.5	0.25	6.5	2.25		0	5	1	7.5	0.25	1.5	0.25
115	3	0.25	4	6.25		0	4	1	7.5	0	1.5	0
120	3	0	5	1		0	4	0	7	0.25	2.5	1
125	2.5	0.25	5	0		0	4	0	7	0	3.5	1
130	2.5	0	5	0		0	4.5	0.25	7.5	0.25	3	0.25
135	2.5	0	4.5	0.25		0	3	2.25	7.5	0	3.5	0.25
140	3.5	1	5	0.25		0	2.5	0.25	7.5	0	3.5	0
145	4	0.25	5	0		0	2.5	0	7.5	0	4	0.25
150	5	1	5	0		0	2.5	0	7.5	0	4	0
155	5	0	5.5	0.25		0	4	2.25	7	0.25	4	0
160	5	0	5.5	0		0	4.5	0.25	6.5	0.25	3.5	0.25
165	4.5	0.25	6	0.25		0	4.5	0	6	0.25	4	0.25
170	4.5	0	6	0		0	3.5	1	6	0	2	4
175	4	0.25	5.5	0.25		0	4	0.25	6	0	3.5	2.25
180	4	0	5	0.25		0	6	4	7	1	3	0.25
185	3.5	0.25	5	0		0	7	1	5	4	2.5	0.25
190	3	0.25	6	1		0	7	0	3	4	1.5	1
195	2.5	0.25	6	0		0	7.5	0.25	4	1	2	0.25
200	3	0.25	6	0		0	8	0.25	5	1	2	0
205	4	1	7	1		0	7.5	0.25	3.5	2.25	0.5	2.25
210	4	0	8	1		0	8	0.25	3	0.25	0	0.25
215	4.5	0.25	8.5	0.25		0	9	1	1.5	2.25	1	1
220	5	0.25	9	0.25		0	10	1	1	0.25	1	0
225	5.5	0.25	10	1		0	11	1	0.5	0.25	0.5	0.25
230	9	12.25	10	0		0	11.5	0.25	0	0.25	1	0.25
235	11	4	10.5	0.25		0	12.5	1	0	0	1.5	0.25
240	10.5	0.25	11	0.25		0	13.5	1	0.5	0.25	2.5	1
245	12.5	4	11.5	0.25		0	13.5	0	1.5	1	1	2.25
250	13	0.25	11	0.25		0	14	0.25	1.5	0	2	1
255	13.5	0.25	10.5	0.25		0	13.5	0.25	2	0.25	2	0
260	13	0.25	10	0.25		0	13	0.25	2	0	2	0
	Sum dy:	34.5	Sum dy:	30.25	Sum dy:	12.75	Sum dy:	70.5	Sum dy:	27.5	Sum dy:	39.25
	m:	53	m:	53	m:	21	m:	53	m:	53	m:	53
	dx:	5	dx:	5	dx:	5	dx:	5	dx:	5	dx:	5
	Z2:	0.161362	Z2:	0.151097	Z2:	0.155839	Z2:	0.230668	Z2:	0.144065	Z2:	0.172112
	JRC:	6.5633	JRC:	5.62182	JRC:	6.06444	JRC:	11.6813	JRC:	4.93926	JRC:	7.48708
	JRC Mean K2, E		6.08318				JRC Mean K2, F		8.03588

## Sheet: K2_Profile H
Analysis JRC Profile H (dx = 5 mm; Barton-Comb)
	Section H, 1, K2		Section H, 2, K2		Section H, 3, K2		Section H, 4, K2
x absolute (5 mm)	y absolute 1	dy (5 mm) 1	y absolute 2	dy (5 mm) 2	y absolute 3	dy (5 mm) 3	y absolute 4	dy (5 mm) 4
0	1	−	6	−	18		5	−
5	1	0	6	0	18	0	5	0
10	2	1	6	0	18	0	4.5	0.25
15	2.5	0.25	4.5	2.25	19	1	4	0.25
20	3	0.25	4	0.25	19	0	4.5	0.25
25	3	0	4	0	19	0	4	0.25
30	4	1	3.5	0.25	19.5	0.25	4.5	0.25
35	4	0	3.5	0	20	0.25	4	0.25
40	6	4	3.5	0	20.5	0.25	4	0
45	7	1	4	0.25	20	0.25	3.5	0.25
50	8	1	4.5	0.25	20.5	0.25	2.5	1
55	9	1	4.5	0	20.5	0	3	0.25
60	8.5	0.25	4	0.25	20	0.25	2	1
65	7.5	1	3.5	0.25	17.5	6.25	2	0
70	9	2.25	3.5	0	16	2.25	2	0
75	9	0	3	0.25	14	4	2	0
80	9	0	2	1	10	16	2	0
85	10	1	1.5	0.25	9	1	3	1
90	12	4	1	0.25	7	4	3	0
95	13	1	1	0	5	4	3	0
100	14	1	1	0	3	4	3.5	0.25
105	16	4	1	0	1	4	3.5	0
110	16.5	0.25	1	0	0	1	3.5	0
115	16.5	0	1	0	0	0	3.5	0
120	17	0.25	1	0	1	1	3.5	0
125	17.5	0.25	1	0	1	0	3	0.25
130	18	0.25	0	1	1.5	0.25	3	0
135	15.5	6.25	0	0	2	0.25	3	0
140	14	2.25	0.5	0.25	2	0	3	0
145	12	4	1	0.25	2.5	0.25	3	0
150	11.5	0.25	1.5	0.25	3	0.25	2.5	0.25
155	11	0.25	2	0.25	4	1	2	0.25
160	9	4	2	0	4	0	1	1
165	6	9	3	1	4.5	0.25	0	1
170	7	1	3.5	0.25	4	0.25	0	0
175	6.5	0.25	4	0.25	4.5	0.25	0.5	0.25
180	5	2.25	2.5	2.25	6	2.25	0	0.25
185	3.5	2.25	3	0.25	6	0	0.5	0.25
190	2.5	1	3.5	0.25	5	1	0.5	0
195	2	0.25	4	0.25	7	4	0.5	0
200	3	1	4	0	7	0	1	0.25
205	3	0	4	0	7	0	2	1
210	2	1	4	0	6	1	2.5	0.25
215	0	4	4	0	5	1	3	0.25
220	1.5	2.25	4	0	7	4	3	0
225	3.5	4	4	0	8	1	3	0
230	3.5	0	5	1	9	1	4	1
235	3.5	0	4	1	9.5	0.25	4	0
240	3	0.25	4	0	10	0.25	5	1
245	2	1	4	0	11	1	5	0
250	1.5	0.25	3	1	11	0	5	0
255	1	0.25	4	1	11	0	4	1
260	2	1	4	0	11	0	5	1
	Sum dy:	73	Sum dy:	16	Sum dy:	69.5	Sum dy:	14.5
	m:	53	m:	53	m:	53	m:	53
	dx:	5	dx:	5	dx:	5	dx:	5
	Z2:	0.234722	Z2:	0.109888	Z2:	0.229026	Z2:	0.104611
	JRC:	11.9309	JRC:	1.0606	JRC:	11.579	JRC:	0.355619
	JRC Mean K2, H		6.23152

## Sheet: K3_Profile G
Analysis JRC Profile G (dx = 5 mm; Barton-Comb)
	Section G, 1, K3		Section G, 2, K3		Section G, 3, K3		Section G, 4, K3		Section G, 5, K3		Section G, 6, K3		Section G, 7, K3
x absolute (5 mm)	y absolute 5	dy (5 mm) 5	y absolute 6	dy (5 mm) 6	y absolute 7	dy (5 mm) 7	y absolute 8	dy (5 mm) 8	y absolute 9	dy (5 mm) 9	y absolute 10	dy (5 mm) 10	y absolute 11	dy (5 mm) 11
0	2	−	12	−	6	−	2	−	3.5	−	4	−	11	−
5	1	1	12.5	0.25	5.5	0.25	4.5	6.25	4	0.25	5	1	11.5	0.25
10	1	0	13	0.25	5	0.25	6	2.25	6	4	5	0	12	0.25
15	1	0	13.5	0.25	4.5	0.25	7	1	6	0	5.5	0.25	12	0
20	1	0	13	0.25	4	0.25	6	1	7	1	4.5	1	10	4
25	2	1	12	1	4	0	7	1	8	1	4.5	0	13	9
30	2	0	12	0	3	1	6.5	0.25	8.5	0.25	4.5	0	13	0
35	2	0	11.5	0.25	6	9	6	0.25	8	0.25	5	0.25	12	1
40	2.5	0.25	11.5	0	2	16	5.5	0.25	10	4	4.5	0.25	12	0
45	2	0.25	11.5	0	1	1	5	0.25	10.5	0.25	4.5	0	13	1
50	2	0	11	0.25	2.5	2.25	5	0	11	0.25	4.5	0	13	0
55	2	0	10	1	1.5	1	4	1	11	0	5	0.25	13.5	0.25
60	2.5	0.25	9.5	0.25	1	0.25	4	0	11.5	0.25	5	0	13	0.25
65	3	0.25	9	0.25	0	1	4	0	9	6.25	7	4	10	9
70	3	0	9	0	1	1	4	0	10.5	2.25	7	0	3	49
75	3	0	9	0	1	0	4	0	10.5	0	5	4	3	0
80	5	4	9.5	0.25	1.5	0.25	4	0	10	0.25	5	0	4	1
85	4	1	9.5	0	1	0.25	5	1	10	0	4.5	0.25	3.5	0.25
90	4	0	8.5	1	1	0	4	1	10.5	0.25	3.5	1	6	6.25
95	3.5	0.25	9	0.25	0.5	0.25	4.5	0.25	10	0.25	4.5	1	11	25
100	3.5	0	10.5	2.25	1.5	1	4	0.25	3	49	4.5	0	17.5	42.25
105	4	0.25	11	0.25	1	0.25	4	0	0.5	6.25	4.5	0	19	2.25
110	3.5	0.25	11	0	1.5	0.25	4	0	0.5	0	3	2.25	19	0
115	4	0.25	12.5	2.25	1.5	0	5	1	0.5	0	3	0	19.5	0.25
120	4	0	13	0.25	2	0.25	5	0	1.5	1	3	0	20	0.25
125	4	0	14	1	3	1	5	0	8.5	49	2.5	0.25	18	4
130	3	1	14	0	3.5	0.25	5	0	10.5	4	2	0.25	16.5	2.25
135	2.5	0.25	14	0	3	0.25	3	4	10	0.25	1.5	0.25	14	6.25
140	2.5	0	14	0	3.5	0.25	2	1	10	0	1.5	0	8	36
145	3	0.25	14	0	4.5	1	2	0	9	1	1.5	0	6	4
150	3	0	14.5	0.25	5	0.25	3	1	9.5	0.25	1.5	0	4	4
155	3	0	14.5	0	5	0	3	0	8.5	1	0	2.25	4	0
160	4	1	14.5	0	5	0	1	4	8.5	0	1	1	4	0
165	3.5	0.25	14.5	0	4.5	0.25	0.5	0.25	9	0.25	2	1	1	9
170	5	2.25	15	0.25	4.5	0	1	0.25	8	1	2	0	1	0
175	5	0	15	0	5	0.25	2	1	8	0	1.5	0.25	1.5	0.25
180	5	0	14.5	0.25	5	0	2	0	8	0	1.5	0	2	0.25
185	4.5	0.25	7	56.25	4	1	2.5	0.25	8	0	2	0.25	2	0
190	5	0.25	4	9	4	0	3	0.25	8	0	3	1	1.5	0.25
195	4	1	1	9	3.5	0.25	4.5	2.25	9	1	5.5	6.25	1.5	0
200	4.5	0.25	0	1	3	0.25	5	0.25	9	0	6	0.25	1.5	0
205	5	0.25	1	1	4	1	5.5	0.25	9	0	7.5	2.25	1	0.25
210	6	1	2	1	3	1	6	0.25	9	0	8.5	1	0	1
215	5.5	0.25	2	0	3	0	7	1	9	0	12.5	16	1	1
220	5	0.25	2	0	2	1	8	1	9	0	14	2.25	2	1
225	5	0	2	0	1.5	0.25	8.5	0.25	9.5	0.25	17	9	2	0
230	4	1	2	0	1	0.25	9	0.25	7.5	4	18	1	1.5	0.25
235	3.5	0.25	2	0	1	0	10	1	7.5	0	19.5	2.25	2	0.25
240	3	0.25	1	1	0.5	0.25	10.5	0.25	7	0.25	20	0.25	3.5	2.25
245	2.5	0.25	0.5	0.25	1	0.25	11	0.25	5.5	2.25	20	0	3.5	0
250	1	2.25	0.5	0	1	0	11.5	0.25	5	0.25	20	0	4	0.25
255	0	1	1	0.25	1.5	0.25	11	0.25	4	1	19.5	0.25	5.5	2.25
260	1	1	1	0	1	0.25	11	0	4	0	19	0.25	9.5	16
	Sum dy:	23.5	Sum dy:	91	Sum dy:	45.5	Sum dy:	36.5	Sum dy:	142.75	Sum dy:	63	Sum dy:	242.25
	m:	53	m:	53	m:	53	m:	53	m:	53	m:	53	m:	53
	dx:	5	dx:	5	dx:	5	dx:	5	dx:	5	dx:	5	dx:	5
	Z2:	0.133176	Z2:	0.262067	Z2:	0.18531	Z2:	0.165973	Z2:	0.328231	Z2:	0.218053	Z2:	0.427586
	JRC:	3.81357	JRC:	13.5093	JRC:	8.54527	JRC:	6.96687	JRC:	16.7336	JRC:	10.8758	JRC:	20.5212
														0
	JRC Mean K3, G		8.63491

## Sheet: K4_Profiles A and B
Analysis JRC Profiles A and B (dx = 5 mm; Barton-Comb)
	Section A, 1, K4		Section A, 2, K4		Section A, 3, K4		Section A, 4, K4		Section B, 1, K4		Section B, 2, K4		Section B, 3, K4		Section B, 4, K4
x absolute (5 mm)	y absolute 1	dy (5 mm) 1	y absolute 2	dy (5 mm) 2	y absolute 3	dy (5 mm) 3	y absolute 4	dy (5 mm) 4	y absolute 5	dy (5 mm) 5	y absolute 6	dy (5 mm) 6	y absolute 7	dy (5 mm) 7	y absolute 8	dy (5 mm) 8
0	5.5	−	0.5	−	0		0	−	4.5	−	1	−	15	−	6	−
5	5.5	0	1	0.25	0.5	0.25	1	1	4	0.25	1	0	13.5	2.25	8	4
10	5	0.25	1.5	0.25	0.5	0	2	1	4	0	1	0	14	0.25	10	4
15	5	0	1.5	0	0.5	0	1.5	0.25	3.5	0.25	1	0	14	0	10.5	0.25
20	4	1	1.5	0	0.5	0	0.5	1	3.5	0	1	0	14	0	11	0.25
25	3	1	1.5	0	0.5	0	0	0.25	3	0.25	1	0	14	0	8	9
30	3	0	1.5	0	0.5	0	0	0	3.5	0.25	1	0	14	0	6.5	2.25
35	3	0	1.5	0	0.5	0	0	0	3	0.25	1	0	14.5	0.25	11	20.25
40	3.5	0.25	1.5	0	0.5	0	0	0	3	0	1	0	15	0.25	11	0
45	3	0.25	1.5	0	0.5	0	0.5	0.25	2.5	0.25	1	0	15	0	11	0
50	2.5	0.25	1.5	0	0.5	0	0	0.25	2.5	0	1	0	15	0	11	0
55	3	0.25	2	0.25	0.5	0	0	0	2	0.25	1.5	0.25	15	0	10	1
60	3	0	2	0	0.5	0	0	0	2	0	1.5	0	15	0	10.5	0.25
65	2.5	0.25	2	0	1	0.25	0	0	1.5	0.25	1.5	0	15	0	11	0.25
70	2	0.25	2	0	1	0	0.5	0.25	1	0.25	1.5	0	15	0	10.5	0.25
75	2	0	2	0	1	0	0.5	0	1	0	1.5	0	15	0	9	2.25
80	2.5	0.25	2	0	1	0	0.5	0	1	0	1.5	0	15	0	5	16
85	2	0.25	2	0	1	0	0.5	0	0.5	0.25	1.5	0	15	0	1	16
90	2	0	2	0	1	0	0.5	0	0.5	0	1	0.25	14.5	0.25	1.5	0.25
95	1.5	0.25	2	0	1	0	0.5	0	0	0.25	1.5	0.25	14	0.25	2	0.25
100	1	0.25	2	0	1	0	0.5	0	0	0	2	0.25	15	1	1	1
105	0	1	2	0	1	0	0.5	0	0.5	0.25	2	0	15	0	1	0
110	0	0	2	0	0.5	0.25	0.5	0	0.5	0	2	0	15	0	0	1
115	0	0	2	0	0.5	0	0.5	0	1	0.25	2	0	15	0	0.5	0.25
120	0	0	2	0	0.5	0	0.5	0	1.5	0.25	2	0	15	0	1	0.25
125	0.5	0.25	1.5	0.25	0.5	0	0.5	0	1.5	0	2	0	15	0	1	0
130	0.5	0	1.5	0	0.5	0	1	0.25	2.5	1	2.5	0.25	15	0	1.5	0.25
135	2	2.25	1.5	0	0.5	0	1	0	2	0.25	2.5	0	14.5	0.25	2	0.25
140	3	1	1	0.25	0.5	0	1	0	2	0	2.5	0	14.5	0	2.5	0.25
145	3	0	1	0	0.5	0	0.5	0.25	2	0	2.5	0	14.5	0	3	0.25
150	3.5	0.25	1	0	0.5	0	0.5	0	2	0	2.5	0	14	0.25	3	0
155	3.5	0	1	0	0	0.25	0.5	0	1.5	0.25	2	0.25	14	0	3.5	0.25
160	4	0.25	1	0	0	0	0.5	0	2	0.25	2.5	0.25	13.5	0.25	4	0.25
165	5	1	1	0	0	0	0.5	0	2	0	2	0.25	14	0.25	4	0
170	5	0	1	0	0	0	0.5	0	2	0	2	0	13.5	0.25	4.5	0.25
175	5	0	1	0	0	0	0.5	0	2	0	2	0	13.5	0	4.5	0
180	5.5	0.25	1	0	0.5	0.25	0.5	0	2	0	2	0	13	0.25	5	0.25
185	5.5	0	0.5	0.25	0.5	0	0.5	0	2	0	2	0	12.5	0.25	5.5	0.25
190	5.5	0	0.5	0	0.5	0		0	2	0	2	0	12	0.25	6	0.25
195	5.5	0	0.5	0	0.5	0		0	2	0	2	0	11	1	6	0
200	5	0.25	1	0.25	0.5	0		0	2.5	0.25	2	0	10.5	0.25	6.5	0.25
205	5	0	0.5	0.25	0.5	0		0	3	0.25	1	1	10	0.25	7	0.25
210	3	4	0.5	0	0.5	0		0	3	0	1	0	9	1	7.5	0.25
215	2.5	0.25	0.5	0	1	0.25		0	3.5	0.25	0.5	0.25	8.5	0.25	8	0.25
220	2.5	0	0.5	0	1	0		0	3.5	0	0.5	0	8	0.25	9	1
225	3	0.25	0.5	0	1	0		0	3	0.25	0	0.25	6.5	2.25	9	0
230	3	0	0.5	0	1	0		0	3.5	0.25	0	0	6	0.25	10	1
235	3	0	0.5	0	1	0		0	3	0.25	0	0	5	1	10	0
240	4	1	0.5	0	0.5	0.25		0	3	0	0	0	4	1	11	1
245	4	0	0.5	0	0.5	0		0	3	0	0.5	0.25	3	1	11	0
250	4	0	0.5	0	0.5	0		0	3	0	0.5	0	2	1	11	0
255	4	0	0.5	0	0.5	0		0	3	0	1	0.25	1	1	11	0
260	4.5	0.25	0	0.25	0.5	0		0	3	0	0.5	0.25	0.5	0.25	11	0
	Sum dy:	17	Sum dy:	2.25	Sum dy:	1.75	Sum dy:	4.75	Sum dy:	6.75	Sum dy:	4.25	Sum dy:	17.25	Sum dy:	85.5
	m:	53	m:	53	m:	53	m:	38	m:	53	m:	53	m:	53	m:	53
	dx:	5	dx:	5	dx:	5	dx:	5	dx:	5	dx:	5	dx:	5	dx:	5
	Z2:	0.11327	Z2:	0.0412082	Z2:	0.0363422	Z2:	0.0707107	Z2:	0.0713746	Z2:	0.0566352	Z2:	0.1141	Z2:	0.254024
	JRC:	1.49476	JRC:	-12.9879	JRC:	-14.7876	JRC:	-5.25398	JRC:	-5.12012	JRC:	-8.43321	JRC:	1.59931	JRC:	13.0628
				0		0		0		0		0
	JRC Mean K4, A		0.373691						JRC Mean K4, B		3.66552

## Sheet: K4_Profiles I and K
Analysis JRC Profiles I and K (dx = 5 mm; Barton-Comb)
	Section I, 1, K4		Section I, 2, K4		Section I, 3, K4		Section K, 1, K4		Section K, 2, K4		Section K, 3, K4		Section K, 4, K4		Section K, 5, K4		Section K, 6, K4		Section K, 7, K4
x absolute (5 mm)	y absolute 1	dy (5 mm) 1	y absolute 2	dy (5 mm) 2	y absolute 3	dy (5 mm) 3	y absolute 1	dy (5 mm) 1	y absolute 2	dy (5 mm) 2	y absolute 3	dy (5 mm) 3	y absolute 4	dy (5 mm) 4	y absolute 5	dy (5 mm) 5	y absolute 6	dy (5 mm) 6	y absolute 7	dy (5 mm) 7
0	1.5	−	0.5	−	8		21		1.5		2		0		1		0.5		4
5	1.5	0	1	0.25	8	0	20.5	0.25	2	0.25	2	0	1	1	1	0	1	0.25	4	0
10	2	0.25	1	0	8	0	20	0.25	3	1	2.5	0.25	1.5	0.25	1	0	2	1	4.5	0.25
15	0.5	2.25	1	0	7.5	0.25	21	1	1.5	2.25	2.5	0	1.5	0	1	0	1	1	4.5	0
20	1	0.25	1	0	8	0.25	23.5	6.25	1.5	0	3	0.25	1.5	0	1	0	1	0	4.5	0
25	2.5	2.25	1	0	7	1	25.5	4	1.5	0	3	0	1	0.25	1	0	1	0	4.5	0
30	4.5	4	1	0	6.5	0.25	27	2.25	1.5	0	3	0	1.5	0.25	1	0	7	36	4.5	0
35	5.5	1	1.5	0.25	7	0.25	28	1	1.5	0	3	0	1.5	0	0.5	0.25	11	16	4.5	0
40	5	0.25	1	0.25	7	0	29.5	2.25	1.5	0	3	0	1.5	0	0.5	0	11	0	4.5	0
45	4	1	1	0	7	0	31.5	4	1.5	0	3	0	2	0.25	0.5	0	10	1	4.5	0
50	4	0	1	0	6.5	0.25	31.5	0	1.5	0	3	0	1.5	0.25	0.5	0	5.5	20.25	4.5	0
55	4.5	0.25	1	0	7	0.25	31.5	0	1.5	0	3.5	0.25	1	0.25	0.5	0	3	6.25	5	0.25
60	4	0.25	1	0	6	1	31.5	0	1	0.25	3	0.25	2	1	0.5	0	3	0	4.5	0.25
65	3.5	0.25	1	0	6	0	31.5	0	1	0	3	0	1	1	0.5	0	3	0	4.5	0
70	4	0.25	1	0	6	0	31	0.25	1.5	0.25	3.5	0.25	1	0	0.5	0	3	0	4.5	0
75	4	0	1	0	6	0	30	1	1	0.25	4	0.25	1	0	0.5	0	2.5	0.25	4.5	0
80	3	1	1	0	6	0	29.5	0.25	1	0	4	0	1	0	0.5	0	2	0.25	5	0.25
85	3	0	1.5	0.25	6	0	29	0.25	1	0	3.5	0.25	0.5	0.25	0.5	0	1.5	0.25	5	0
90	2.5	0.25	1.5	0	5.5	0.25	29	0	1	0	3.5	0	0	0.25	1	0.25	1.5	0	5	0
95	2	0.25	1.5	0	5.5	0	28	1	1	0	3.5	0	0.5	0.25	0.5	0.25	2	0.25	5	0
100	2.5	0.25	1.5	0	5	0.25	24.5	12.25	1	0	4	0.25	0.5	0	0.5	0	2	0	4.5	0.25
105	2.5	0	1.5	0	5	0	21	12.25	1	0	4	0	0.5	0	0.5	0	1.5	0.25	4.5	0
110	2.5	0	1	0.25	5	0	16	25	1.5	0.25	3.5	0.25	0.5	0	0.5	0	2	0.25	4.5	0
115	2.5	0	0.5	0.25	4.5	0.25	12	16	1	0.25	4	0.25	0.5	0	0.5	0	2	0	4	0.25
120	2.5	0	1	0.25	4.5	0	9	9	1.5	0.25	3.5	0.25	0.5	0	0.5	0	3	1	4	0
125	6	12.25	1	0	4	0.25	8	1	1.5	0	4	0.25	0.5	0	1	0.25	3	0	4	0
130	6	0	1	0	4	0	12.5	20.25	1.5	0	3.5	0.25	1	0.25	7	36	3.5	0.25	4	0
135	6	0	2	1	4	0	13	0.25	1.5	0	3.5	0	0.5	0.25	8	1	3.5	0	4	0
140	5.5	0.25	2	0	4	0	11	4	1.5	0	3	0.25	0.5	0	8	0	4	0.25	3.5	0.25
145	5.5	0	1.5	0.25	3	1	11	0	1.5	0	3.5	0.25	1.5	1	9	1	4	0	3.5	0
150	6	0.25	1.5	0	3	0	10.5	0.25	1.5	0	3.5	0	1.5	0	12	9	4.5	0.25	3.5	0
155	5.5	0.25	1.5	0	2.5	0.25	10	0.25	2	0.25	3	0.25	1	0.25	9	9	5	0.25	3	0.25
160	6	0.25	1.5	0	2	0.25	10	0	2	0	3	0	1	0	2	49	5	0	3	0
165	6	0	1.5	0	2	0	10.5	0.25	2	0	3.5	0.25	1	0	1	1	5	0	3	0
170	5.5	0.25	2	0.25	2	0	6	20.25	2	0	4	0.25	1	0	1	0	5	0	3	0
175	5	0.25	2	0	1.5	0.25	0.5	30.25	2	0	3.5	0.25	1	0	1	0	5.5	0.25	3	0
180	5.5	0.25	2	0	1.5	0	0.5	0	2.5	0.25	3	0.25	1	0	0.5	0.25	5	0.25	3	0
185	5.5	0	1	1	1.5	0	1	0.25	2	0.25	3	0	1	0	0.5	0	5	0	3	0
190	5	0.25	1	0	1.5	0	2	1	2.5	0.25	3	0	1.5	0.25	0.5	0	6	1	3	0
195	5	0	1.5	0.25	1	0.25	2	0	2.5	0	3	0	7	30.25	0.5	0	8	4	3	0
200	5	0	1.5	0	1	0	2	0	2.5	0	3	0	9	4	0.5	0	9	1	3	0
205	4.5	0.25	1.5	0	1	0	2	0	3	0.25	3	0	19	100	0.5	0	8	1	3	0
210	4.5	0	2	0.25	1	0	2.5	0.25	2	1	3	0	19	0	0.5	0	7	1	3	0
215	4.5	0	1	1	1	0	3	0.25	2	0	3	0	19	0	0.5	0	8	1	2	1
220	4.5	0	1	0	0.5	0.25	3	0	2	0	3	0	16	9	1	0.25	8	0	2	0
225	4.5	0	1	0	0.5	0	3.5	0.25	3	1	3	0	14	4	3	4	7	1	2	0
230	4	0.25	1	0	0	0.25	4	0.25	3	0	3	0	9	25	2	1	5	4	2	0
235	3.5	0.25	1	0	0	0	3.5	0.25	2.5	0.25	3	0	5	16	1	1	2	9	2	0
240	3.5	0	1	0	0.5	0.25	3.5	0	2.5	0	3	0	3	4	1	0	2	0	2	0
245	3.5	0	1	0	0.5	0	4	0.25	3	0.25	3	0	3	0	1	0	1	1	2	0
250	3	0.25	0.5	0.25	1	0.25	4.5	0.25	2.5	0.25	3	0	3	0	1	0	0.5	0.25	2	0
255	3	0	0	0.25	1	0	4.5	0	3	0.25	3	0	3	0	1	0	0	0.25	1.5	0.25
260	3	0	0.5	0.25	1	0	5	0.25	2.5	0.25	2	1	5	4	1.5	0.25	0	0	2	0.25
	Sum dy:	29.25	Sum dy:	6.5	Sum dy:	7.5	Sum dy:	178.5	Sum dy:	9.5	Sum dy:	6	Sum dy:	203.5	Sum dy:	113.75	Sum dy:	110.25	Sum dy:	3.5
	m:	53	m:	53	m:	53	m:	53	m:	53	m:	53	m:	53	m:	53	m:	53	m:	53
	dx:	5	dx:	5	dx:	5	dx:	5	dx:	5	dx:	5	dx:	5	dx:	5	dx:	5	dx:	5
	Z2:	0.148578	Z2:	0.0700404	Z2:	0.0752355	Z2:	0.367038	Z2:	0.0846747	Z2:	0.0672927	Z2:	0.391899	Z2:	0.293	Z2:	0.288457	Z2:	0.0513956
	JRC:	5.38108	JRC:	-5.3904	JRC:	-4.36558	JRC:	18.3342	JRC:	-2.67268	JRC:	-5.96363	JRC:	19.2729	JRC:	15.1073	JRC:	14.8835	JRC:	-9.82366
				0		0				0		0								0
	JRC Mean K4, I		1.79369				JRC Mean K4, K		9.65683

## Sheet: K4_Profile N
Analysis JRC Profile N (dx = 5 mm; Barton-Comb)
	Section N, 1, K4		Section N, 2, K4		Section N, 3, K4		Section N, 4, K4		Section N, 5, K4		Section N, 6, K4		Section N, 7, K4
x absolute (5 mm)	y absolute 1	dy (5 mm) 1	y absolute 2	dy (5 mm) 2	y absolute 3	dy (5 mm) 3	y absolute 4	dy (5 mm) 4	y absolute 5	dy (5 mm) 5	y absolute 6	dy (5 mm) 6	y absolute 7	dy (5 mm) 7
0	2.5	−	0	−	0		0	−	2.5	−	1.5	−	0.5	−
5	0	6.25	1.5	2.25	0	0	0	0	2.5	0	1	0.25	1	0.25
10	2.5	6.25	2.5	1	0	0	0	0	2.5	0	1.5	0.25	1	0
15	2.5	0	2	0.25	0	0	0	0	2	0.25	4	6.25	0	1
20	2.5	0	1	1	0	0	0	0	2	0	7	9	0.5	0.25
25	3	0.25	1	0	0.5	0.25	0.5	0.25	2.5	0.25	1	36	1	0.25
30	3	0	1	0	0.5	0	0.5	0	4	2.25	2.5	2.25	1	0
35	2.5	0.25	1	0	0.5	0	1	0.25	3	1	3	0.25	1	0
40	3	0.25	1	0	0.5	0	1	0	2.5	0.25	3	0	1	0
45	3	0	1.5	0.25	1	0.25	1.5	0.25	2.5	0	2	1	1	0
50	2	1	1.5	0	1	0	4	6.25	2	0.25	1.5	0.25	1	0
55	2.5	0.25	1.5	0	1.5	0.25	7.5	12.25	3	1	1.5	0	1	0
60	2.5	0	1	0.25	0.5	1	9.5	4	2	1	2	0.25	1.5	0.25
65	3	0.25	1	0	1.5	1	13	12.25	2.5	0.25	2.5	0.25	3	2.25
70	2	1	1	0	1.5	0	18	25	2.5	0	2	0.25	3	0
75	2	0	1	0	1.5	0	19	1	2	0.25	2.5	0.25	2	1
80	3	1	1	0	1	0.25	19	0	2	0	4	2.25	2	0
85	3	0	1	0	2	1	10.5	72.25	2	0	8	16	3	1
90	3	0	1	0	2.5	0.25	10	0.25	2.5	0.25	11	9	3.5	0.25
95	2.5	0.25	1	0	2	0.25	10	0	2	0.25	11.5	0.25	4	0.25
100	2.5	0	1	0	2	0	10.5	0.25	2	0	13	2.25	4	0
105	3	0.25	1	0	2.5	0.25	12	2.25	2	0	14	1	4	0
110	3	0	1	0	2.5	0	11.5	0.25	2	0	13	1	4.5	0.25
115	3	0	1	0	2.5	0	11	0.25	2	0	13	0	4.5	0
120	3.5	0.25	1	0	2.5	0	11	0	2	0	11.5	2.25	5	0.25
125	3.5	0	1	0	2.5	0	10	1	2	0	11	0.25	4.5	0.25
130	2.5	1	1	0	2	0.25	8	4	2	0	9.5	2.25	5	0.25
135	3	0.25	1	0	2	0	4	16	2	0	6	12.25	6	1
140	3	0	1	0	2.5	0.25	2.5	2.25	2	0	5	1	6.5	0.25
145	3	0	1.5	0.25	2.5	0	2	0.25	3	1	5	0	5	2.25
150	3.5	0.25	1.5	0	2	0.25	2	0	2.5	0.25	5	0	4.5	0.25
155	3	0.25	1	0.25	2	0	2	0	2	0.25	5	0	3	2.25
160	3	0	1.5	0.25	2	0	2	0	2	0	6	1	3	0
165	3	0	1.5	0	2	0	2.5	0.25	2	0	6.5	0.25	3	0
170	3	0	1.5	0	2	0	2.5	0	2	0	7	0.25	2.5	0.25
175	3	0	1	0.25	2	0	3	0.25	2	0	7.5	0.25	2	0.25
180	3	0	2	1	1.5	0.25	2.5	0.25	2	0	8	0.25	2	0
185	2.5	0.25	2	0	1.5	0	0.5	4	2	0	9	1	2	0
190	3	0.25	1.5	0.25	1.5	0	0.5	0	2	0	11	4	2	0
195	3	0	1.5	0	1.5	0	2.5	4	1.5	0.25	12	1	1.5	0.25
200	3	0	2	0.25	1.5	0	3	0.25	2	0.25	12	0	1	0.25
205	2.5	0.25	2	0	1.5	0	3.5	0.25	1.5	0.25	13	1	1	0
210	3	0.25	1.5	0.25	2	0.25	3.5	0	2	0.25	18	25	1	0
215	3	0	2	0.25	1.5	0.25	3	0.25	2	0	24.5	42.25	1	0
220	3	0	2	0	1	0.25	3	0	2	0	24.5	0	1	0
225	3	0	2	0	1	0	3	0	2	0	24.5	0	1	0
230	3	0	2	0	0.5	0.25	3.5	0.25	2.5	0.25	25	0.25	2	1
235	3	0	2	0	0.5	0	3.5	0	2	0.25	24.5	0.25	2	0
240	3	0	1.5	0.25	0.5	0	4	0.25	2	0	25	0.25	2	0
245	2.5	0.25	1.5	0	0.5	0	4	0	0	4	25	0	3.5	2.25
250	3	0.25	1.5	0	0	0.25	4.5	0.25	0	0	22	9	3	0.25
255	3	0	2	0.25	0	0	5	0.25	2	4	22	0	2	1
260	3	0	2	0	0	0	3.5	2.25	2.5	0.25	22	0	0	4
	Sum dy:	20.75	Sum dy:	8.5	Sum dy:	7	Sum dy:	173.25	Sum dy:	18.5	Sum dy:	192.25	Sum dy:	23.25
	m:	53	m:	53	m:	53	m:	53	m:	53	m:	53	m:	53
	dx:	5	dx:	5	dx:	5	dx:	5	dx:	5	dx:	5	dx:	5
	Z2:	0.125141	Z2:	0.0800943	Z2:	0.0726844	Z2:	0.3616	Z2:	0.118162	Z2:	0.380913	Z2:	0.132466
	JRC:	2.92229	JRC:	-3.46922	JRC:	-4.85967	JRC:	18.1204	JRC:	2.10032	JRC:	18.8656	JRC:	3.73697
				0		0
	JRC Mean K4, N		6.53508
