# Supplementary material for: Stability assessment of degrading permafrost rock slopes based on a coupled thermo-mechanical model
Source: Copernicus journal article supplement (doi:10.5194/esurf-2020-70), 2020-09-28
Supplement: Supplementary file 1 [file esurf-2020-70-supplement.zip › Suppl. material/Dataset S12. Size of rock samples_Table 3.xlsx]

## Sheet: Cylinders
Cylinders
	Sample	Mean diameter [mm]	Mean height [mm]	Relation length-diameter
1	ZG3_1	50.6233	101.16	1.99829
2	ZG6_1	50.5967	99.8733	1.97391
3	ZG6_2	50.63	102.397	2.02245
4	ZG6_3	50.6633	102.357	2.02033
5	ZG8_1	50.72	106.103	2.09194
6	ZG10_1	50.6133	105.673	2.08786
7	ZG11_1	50.5833	104.29	2.06175
8	ZG11_2	50.5333	102.517	2.02869
9	ZG13_1	50.1167	100.75	2.01031
10	ZG13_4	50.78	100.717	1.98339
11	ZG14_1	50.7267	103.277	2.03594
12	ZG14_2	50.8033	103.4	2.0353
13	ZG14_3	50.7333	102.953	2.0293
14	ZG14_4	50.8167	100.023	1.96832
15	ZG14_5	50.85	102.857	2.02275
16	ZG14_6	50.84	102.183	2.0099
17	ZG14_7	50.76	102.603	2.02134
18	ZG14_9	50.7967	103.833	2.0441
19	ZG16_1	50.6467	104.543	2.06417
20	ZG17_1	50.59	104.233	2.06035
21	ZG17_2	50.6533	102.3	2.01961
22	ZG17_3	50.6633	102.433	2.02184
23	ZG17_4	50.57	102.64	2.02966
24	ZG17_5	50.5567	103.197	2.04121
25	ZG17_6	50.5567	103.243	2.04213
26	ZG17_7	50.5967	102.017	2.01627
27	ZG17_9	50.6333	101.663	2.00783
28	ZG17_10	50.57	103.27	2.04212
29	ZG19_1	50.6133	102.223	2.01969
30	ZG19_2	50.6333	103.11	2.03641

## Sheet: Discs
Discs
	Sample	Mean diameter [mm]	Mean height [mm]	Relation length-diameter
1	ZG3_B1	50.6667	23.96	0.472895
2	ZG3_B2	50.6567	23.0133	0.4543
3	ZG3_B3	50.63	24.2167	0.478307
4	ZG3_B4	50.6367	25.37	0.50102
5	ZG3_B5	50.5833	23.73	0.469127
6	ZG3_B6	50.57	24.5967	0.486389
7	ZG3_B7	50.5533	24.3	0.48068
8	ZG3_B8	50.56	25.0567	0.495583
9	ZG3_B9	50.5833	24.24	0.479209
10	ZG3_B10	50.52	24.1333	0.477699
11	ZG3_B11	50.56	25.0933	0.496308
12	ZG3_B12	50.5367	24.0867	0.476618
13	ZG3_B13	50.5633	28.4033	0.561738
14	ZG3_B14	50.59	24.31	0.48053
15	ZG6_B1	50.59	23.4733	0.463992
16	ZG6_B2	50.5233	24.3967	0.482879
17	ZG8_B1	50.5933	24.3567	0.48142
18	ZG8_B2	50.71	23.0367	0.454283
19	ZG8_B3	50.7933	25.5533	0.503084
20	ZG8_B4	50.83	23.9767	0.471703
21	ZG8_B5	50.7833	23.31	0.459009
22	ZG8_B6	50.8367	24.6067	0.484034
23	ZG8_B7	50.5933	24.77	0.48959
24	ZG8_B8	50.81	23.75	0.467428
25	ZG8_B10	50.59	24.6233	0.486723
26	ZG8_B11	50.5867	24.94	0.493015
27	ZG8_B12	50.59	26.0267	0.514463
28	ZG8_B13	50.6267	24.6967	0.487819
29	ZG8_B14	50.6167	24.3233	0.48054
30	ZG8_B15	50.5833	24.1333	0.4771
31	ZG8_B16	50.5967	24.37	0.481652
32	ZG8_B17	50.58	24.94	0.49308
33	ZG8_B18	50.5767	24.5133	0.484677
34	ZG9_B1	50.65	26.0367	0.514051
35	ZG9_B2	50.6133	23.4133	0.462592
36	ZG9_B3	50.6233	24.04	0.47488
37	ZG10_B2	50.6633	25.3233	0.499836
38	ZG11_B1	50.64	24.4167	0.482162
39	ZG11_B2	50.5533	25.2667	0.499802
40	ZG11_B3	50.59	25.1933	0.49799
41	ZG12_B1	50.53	23.96	0.474174
42	ZG12_B2	50.54	25.04	0.495449
43	ZG13_B1	50.03	24.4933	0.489573
44	ZG13_B2	50.07	24.4667	0.488649
45	ZG13_B3	50.0933	25.9033	0.517101
46	ZG16_B1	50.6267	24.53	0.484527
47	ZG16_B3	50.6667	26.3133	0.519342
48	ZG17_B1	50.7967	24.9067	0.490321
49	ZG17_B2	50.6367	25.59	0.505365
50	ZG17_B3	50.65	24.5033	0.483778
51	ZG17_B4	50.5633	27.2767	0.539455
52	ZG17_B5	50.5433	24.1267	0.477346
53	ZG17_B6	50.5267	24.59	0.486674
54	ZG17_B7	50.55	24.57	0.486053
55	ZG17_B8	50.5567	24.9067	0.492649
56	ZG17_B9	50.55	23.7433	0.4697
57	ZG19_B2	50.64	25.0267	0.494207
58	ZG19_B3	50.67	26.4667	0.522334
59	ZG20_B1	50.6733	25.68	0.506775
60	ZG20_B2	50.6733	23.1833	0.457506
