# Supplementary material for: Stability assessment of degrading permafrost rock slopes based on a coupled thermo-mechanical model
Source: Copernicus journal article supplement (doi:10.5194/esurf-2020-70), 2020-09-28
Supplement: Supplementary file 1 [file esurf-2020-70-supplement.zip › Suppl. material/Dataset S13. Warming rock samples_Laboratory_Fig. S8.xlsx]

## Sheet: Brazilian
Sample	1		Sample	2		Sample	3		Sample	4		Sample	5		Sample	6
Time	Temperature [C°]		Time	Temperature [C°]		Time	Temperature [C°]		Time	Temperature [C°]		Time	Temperature [C°]		Time	Temperature [C°]
00:00:00			00:00:00			00:00:00			00:00:00			00:00:00			00:00:00
00:00:30	-20.22		00:00:30	-21.1		00:00:30	-19.23		00:00:30	-12.5		00:00:30	-15.59		00:00:30	-20.71
00:01:00	-19.61		00:01:00	-21.55		00:01:00	-18.4		00:01:00	-12.64		00:01:00	-17.12		00:01:00	-21.42
00:01:30	-18.47		00:01:30	-20.67		00:01:30	-17.29		00:01:30	-12.01		00:01:30	-16.64		00:01:30	-21.11
00:02:00	-17.04		00:02:00	-19.55		00:02:00	-16.03		00:02:00	-10.88		00:02:00	-15.74		00:02:00	-20.25
00:02:30	-15.58		00:02:30	-18.25		00:02:30	-14.8		00:02:30	-9.79		00:02:30	-14.7		00:02:30	-19.19
00:03:00	-14.17		00:03:00	-17.27		00:03:00	-13.46		00:03:00	-8.64		00:03:00	-13.62		00:03:00	-18
00:03:30	-12.8		00:03:30	-16.11		00:03:30	-12.39		00:03:30	-7.54		00:03:30	-12.6		00:03:30	-16.79
00:04:00	-11.56		00:04:00	-14.86		00:04:00	-11.25		00:04:00	-6.46		00:04:00	-11.6		00:04:00	-15.57
00:04:30	-10.35		00:04:30	-13.93		00:04:30	-10.1		00:04:30	-5.41		00:04:30	-10.5		00:04:30	-14.3
00:05:00	-9.2		00:05:00	-12.89		00:05:00	-9.06		00:05:00	-4.48		00:05:00	-9.52		00:05:00	-12.94
00:05:30	-8.09		00:05:30	-11.75		00:05:30	-7.87		00:05:30	-3.57		00:05:30	-8.62		00:05:30	-11.91
00:06:00	-7		00:06:00	-10.97		00:06:00	-7.03		00:06:00	-2.68		00:06:00	-7.65		00:06:00	-10.73
00:06:30	-6.01		00:06:30	-10.04		00:06:30	-6.14		00:06:30	-1.88		00:06:30	-6.75		00:06:30	-9.83
00:07:00	-5.05		00:07:00	-9.14		00:07:00	-5.09		00:07:00	-1.09		00:07:00	-5.97		00:07:00	-8.84
00:07:30	-4.15		00:07:30	-8.33		00:07:30	-4.35		00:07:30	-0.36		00:07:30	-5.09		00:07:30	-7.89
00:08:00	-3.27		00:08:00	-7.45		00:08:00	-3.56		00:07:47	0		00:08:00	-4.33		00:08:00	-6.97
00:08:30	-2.38		00:08:30	-6.69		00:08:30	-2.74					00:08:30	-3.58		00:08:30	-5.97
00:09:00	-1.65		00:09:00	-5.92		00:09:00	-1.99					00:09:00	-2.84		00:09:00	-5.38
00:09:30	-0.84		00:09:30	-5.21		00:09:30	-1.17					00:09:30	-2.18		00:09:30	-4.56
00:10:00	-0.2		00:10:00	-4.51		00:10:00	-0.6					00:10:00	-1.49		00:10:00	-3.67
00:10:10	0		00:10:30	-3.75		00:10:30	-0.01					00:10:30	-0.9		00:10:30	-2.85
			00:11:00	-3.15		00:10:33	0					00:11:00	-0.28		00:11:00	-2.21
			00:11:30	-2.43								00:11:16	0		00:11:30	-1.49
			00:12:00	-1.9											00:12:00	-0.75
			00:12:30	-1.31											00:12:30	-0.2
			00:13:00	-0.76											00:12:44	0
			00:13:30	-0.22
			00:13:40	0
Sample	7		Sample	8		Sample	9		Sample	10		Sample	11		Means
Time	Temperature [C°]		Time	Temperature [C°]		Time	Temperature [C°]		Time	Temperature [C°]		Time	Temperature [C°]		Time	Temperature [C°]
00:00:00			00:00:00			00:00:00			00:00:00			00:00:00			00:00:00
00:00:30	-23.17		00:00:30	-21.2		00:00:30	-20.22		00:00:30	-18.83		00:00:30	-18.75		00:00:30	-19.2291
00:01:00	-22.92		00:01:00	-20.12		00:01:00	-20.79		00:01:00	-19.54		00:01:00	-19.83		00:01:00	-19.4491
00:01:30	-22.02		00:01:30	-19.1		00:01:30	-20.05		00:01:30	-18.65		00:01:30	-18.73		00:01:30	-18.6127
00:02:00	-21.01		00:02:00	-17.75		00:02:00	-19.01		00:02:00	-17.45		00:02:00	-17.68		00:02:00	-17.49
00:02:30	-19.78		00:02:30	-15.86		00:02:30	-17.8		00:02:30	-16.14		00:02:30	-16.49		00:02:30	-16.2164
00:03:00	-18.63		00:03:00	-14.46		00:03:00	-16.56		00:03:00	-14.84		00:03:00	-15.02		00:03:00	-14.97
00:03:30	-17.47		00:03:30	-13.12		00:03:30	-15.28		00:03:30	-13.6		00:03:30	-13.84		00:03:30	-13.7764
00:04:00	-16.31		00:04:00	-11.92		00:04:00	-14.09		00:04:00	-12.4		00:04:00	-12.97		00:04:00	-12.6355
00:04:30	-15.16		00:04:30	-10.76		00:04:30	-12.85		00:04:30	-11.22		00:04:30	-11.86		00:04:30	-11.4945
00:05:00	-14.04		00:05:00	-9.69		00:05:00	-11.76		00:05:00	-10.1		00:05:00	-10.75		00:05:00	-10.4027
00:05:30	-12.97		00:05:30	-8.61		00:05:30	-10.69		00:05:30	-9.1		00:05:30	-9.71		00:05:30	-9.35364
00:06:00	-11.94		00:06:00	-7.63		00:06:00	-9.65		00:06:00	-8.03		00:06:00	-8.65		00:06:00	-8.36
00:06:30	-10.92		00:06:30	-6.63		00:06:30	-8.66		00:06:30	-7.04		00:06:30	-7.86		00:06:30	-7.43273
00:07:00	-9.97		00:07:00	-5.74		00:07:00	-7.67		00:07:00	-6.18		00:07:00	-6.87		00:07:00	-6.51
00:07:30	-9.08		00:07:30	-4.92		00:07:30	-6.78		00:07:30	-5.25		00:07:30	-5.98		00:07:30	-5.65273
00:08:00	-8.15		00:08:00	-4.06		00:08:00	-5.77		00:08:00	-4.4		00:08:00	-5.27		00:08:00	-4.83909
00:08:30	-7.26		00:08:30	-3.31		00:08:30	-5.04		00:08:30	-3.55		00:08:30	-4.53		00:08:30	-4.09545
00:09:00	-6.46		00:09:00	-2.5		00:09:00	-4.38		00:09:00	-2.8		00:09:00	-3.74		00:09:00	-3.42364
00:09:30	-5.72		00:09:30	-1.87		00:09:30	-3.45		00:09:30	-2.06		00:09:30	-3.12		00:09:30	-2.74364
00:10:00	-4.96		00:10:00	-1.13		00:10:00	-2.69		00:10:00	-1.34		00:10:00	-2.4		00:10:00	-2.09
00:10:30	-4.22		00:10:30	-0.5		00:10:30	-2.02		00:10:30	-0.66		00:10:30	-1.77		00:10:30	-1.51636
00:11:00	-3.51		00:11:00	0		00:11:00	-1.38		00:11:00	-0.06		00:11:00	-0.93
00:11:30	-2.88		11:30:00			00:11:30	-0.73		00:11:04	0		00:11:30	-0.34
00:12:00	-2.19		12:00:00			00:12:00	-0.15					00:11:49	0
00:12:30	-1.6		12:30:00			00:12:10	0
00:13:00	-1		13:00:00
00:13:30	-0.48		13:30:00
00:14:00	0		14:00:00

## Sheet: UCS
			Sample		Sample		Sample		Sample		Sample		Sample
Sample	ZG17_8	2	ZG17_8	3	ZG17_8	4	ZG17_8	6	ZG17_8	7	ZG17_8	8	ZG17_8	9	Means
Time	Temperature top [°C]	Temperature centre [°C]	Temperature top [°C]	Temperature centre [°C]	Temperature top [°C]	Temperature centre [°C]	Temperature top [°C]	Temperature centre [°C]	Temperature top [°C]	Temperature centre [°C]	Temperature top [°C]	Temperature centre [°C]	Temperature top [°C]	Temperature centre [°C]	Temperature top [°C]	Temperature centre [°C]
00:00:00
00:00:30			-20.8	-24.58	-19.13	-23.36	-19.47	-22.97	-15.25	-23.44	-16.35	-22.96	-18.86	-22.25	-18.31	-23.26
00:01:00	-20.07	-25.76	-16.73	-25.64	-15.01	-24.04	-16.29	-23.5	-13.98	-23.65	-12.15	-23.42	-17.03	-23.05	-15.8943	-24.1514
00:01:30	-16.03	-25.92	-12.02	-25.81	-11.01	-24.18	-12.31	-23.61	-11.67	-23.57	-8.69	-23.48	-14.17	-23.14	-12.2714	-24.2443
00:02:00	-12.85	-25.74	-8.83	-25.66	-8.05	-24.07	-9.17	-23.47	-9.97	-23.26	-6.25	-23.27	-11.65	-23.01	-9.53857	-24.0686
00:02:30	-10.3	-25.3	-6.45	-25.29	-5.78	-23.64	-7.1	-23.11	-8.11	-22.79	-4.35	-22.8	-9.72	-22.62	-7.40143	-23.65
00:03:00	-8.39	-24.57	-4.33	-24.69	-4.03	-23.01	-5.26	-22.52	-6.7	-22.12	-2.8	-22.14	-8.03	-22.17	-5.64857	-23.0314
00:03:30	-6.68	-23.7	-2.82	-23.99	-2.61	-22.28	-3.9	-21.88	-5.23	-21.21	-1.66	-21.24	-6.61	-21.54	-4.21571	-22.2629
00:04:00	-5.32	-22.68	-1.46	-23.19	-1.42	-21.42	-2.7	-21.16	-4.36	-20.49	-0.58	-20.47	-5.46	-20.87	-3.04286	-21.4686
00:04:30	-4.01	-21.58	-0.43	-22.21	-0.36	-20.44	-1.66	-20.34	-3.42	-19.61	0.62	-19.48	-4.32	-20.13	-1.94	-20.5414
00:05:00	-2.93	-20.44	0.48	-21.33	0.55	-19.58	-0.74	-19.44	-2.52	-18.63	1.28	-18.68	-3.44	-19.36	-1.04571	-19.6371
00:05:30	-1.89	-19.3	1.25	-20.4	1.3	-18.53	0	-18.47	-1.74	-17.71	1.93	-17.83	-2.54	-18.56	-0.241429	-18.6857
00:06:00	-1.04	-18.06	1.98	-19.38	1.94	-17.57	0.71	-17.75	-1.05	-16.79	2.51	-16.98	-1.79	-17.81	0.465714	-17.7629
00:06:30	-0.3	-16.93	2.87	-18.23	2.64	-16.54	1.33	-16.78	-0.33	-15.85	3.14	-16.06	-1.14	-16.95	1.17286	-16.7629
00:07:00	0.42	-15.86	3.16	-17.46	3.16	-15.56	1.9	-15.92	0.27	-14.96	3.69	-15.06	-0.53	-16.21	1.72429	-15.8614
00:07:30	1.11	-14.77	3.62	-16.63	3.7	-14.66	2.48	-15.15	0.86	-14.01	4.16	-14.29	0.17	-15.4	2.3	-14.9871
00:08:00	1.75	-13.75	4.09	-15.72	4.1	-13.69	3.02	-14.26	1.37	-13.16	4.55	-13.47	0.61	-14.69	2.78429	-14.1057
00:08:30	2.33	-12.72	4.51	-14.8	4.58	-12.79	3.5	-13.36	1.83	-12.33	4.96	-12.64	1.07	-13.92	3.25429	-13.2229
00:09:00	2.94	-11.76	4.89	-14.02	4.94	-11.9	3.85	-12.55	2.28	-11.45	5.4	-11.79	1.54	-13.26	3.69143	-12.39
00:09:30	3.39	-10.68	5.28	-13.15	5.32	-11.05	4.27	-11.8	2.72	-10.61	5.72	-11.07	1.99	-12.52	4.09857	-11.5543
00:10:00	3.88	-9.8	5.64	-12.37	5.7	-10.22	4.62	-11.02	3.2	-9.84	6.13	-10.28	2.39	-11.88	4.50857	-10.7729
00:10:30	4.39	-8.91	5.95	-11.55	6.2	-9.4	5.03	-10.19	3.56	-9.08	6.38	-9.53	3.08	-11.14	4.94143	-9.97143
00:11:00	4.8	-8.08	6.23	-10.8	6.37	-8.59	5.34	-9.57	3.96	-8.32	6.69	-8.82	3.42	-10.51	5.25857	-9.24143
00:11:30	5.22	-7.19	6.48	-10.08	6.65	-7.86	5.63	-8.89	4.29	-7.55	6.99	-8.08	3.76	-9.88	5.57429	-8.50429
00:12:00	5.62	-6.37	6.72	-9.34	6.99	-7.06	5.97	-8.16	4.63	-6.86	7.26	-7.48	4.06	-9.27	5.89286	-7.79143
00:12:30	6	-5.6	6.95	-8.68	7.23	-6.42	6.23	-7.53	5.01	-6.2	7.52	-6.79	4.29	-8.69	6.17571	-7.13
00:13:00	6.42	-4.87	7.18	-8.02	7.5	-5.74	6.51	-6.86	5.31	-5.55	7.75	-6.2	4.57	-8.08	6.46286	-6.47429
00:13:30	6.74	-4.13	7.42	-7.33	7.75	-5.08	6.79	-6.23	5.63	-4.93	8.01	-5.52	4.83	-7.5	6.73857	-5.81714
00:14:00	7.02	-3.45	7.64	-6.64	8.04	-4.4	7.03	-5.63	5.99	-4.32	8.23	-4.99	5.14	-7	7.01286	-5.20429
00:14:30	7.36	-2.78	7.89	-5.96	8.23	-3.8	7.27	-5.08	6.2	-3.7	8.46	-4.42	5.37	-6.43	7.25429	-4.59571
00:15:00	7.63	-2.18	8.08	-5.38	8.45	-3.22	7.53	-4.5	6.52	-3.12	8.71	-3.86	5.58	-5.95	7.5	-4.03
00:15:30	7.92	-1.51	8.29	-4.77	8.68	-2.69	7.73	-3.88	6.74	-2.59	8.87	-3.3	5.86	-5.4	7.72714	-3.44857
00:16:00	8.18	-0.99	8.5	-4.15	8.92	-2.09	7.95	-3.38	6.98	-2.07	9.05	-2.8	6.09	-4.94	7.95286	-2.91714
00:16:30	8.47	-0.42	8.69	-3.57	9.09	-1.53	8.16	-2.82	7.29	-1.49	9.24	-2.25	6.28	-4.45	8.17429	-2.36143
00:17:00	8.72	0.14	8.89	-2.98	9.28	-1.03	8.36	-2.36	7.48	-1.02	9.43	-1.77	6.49	-3.95	8.37857	-1.85286
00:17:30	8.91	0.73	9.06	-2.46	9.45	-0.54	8.54	-1.89	7.7	-0.56	9.6	-1.29	6.71	-3.51	8.56714	-1.36
00:18:00			9.25	-1.89	9.65	-0.07	8.72	-1.38	7.93	-0.09	9.77	-0.81	6.92	-3.11
00:18:30			9.43	-1.41			8.92	-0.93			9.94	-0.42	7.1	-2.68
00:19:00			9.65	-0.91			9.09	-0.53			10.11	0	7.31	-2.28
00:19:30			9.77	-0.39			9.28	-0.11					7.48	-1.84
00:19:58			9.89	0									7.65	-1.45
00:20:30													7.84	-1.06
01:21:00													8.02	-0.71
02:21:30													8.18	-0.31
03:22:00													8.34	0
