# Supplementary material for: Stability assessment of degrading permafrost rock slopes based on a coupled thermo-mechanical model
Source: Copernicus journal article supplement (doi:10.5194/esurf-2020-70), 2020-09-28
Supplement: Supplementary file 1 [file esurf-2020-70-supplement.zip › Suppl. material/Dataset S14. Numerical code for UDEC/UniversalModel_frozen_rocktype_60degr.uddat]

fish define rock_type(nr, k1, k2, k3, k4, k5, k6)

command


; INITIAL CONDITIONS

; ROUNDING of BLOCKS
block tolerance corner-round-length 0.1

;
; DAMPING METHOD
block mechanical damping global
;

; GEOMETRY of block with TOPOGRAPHY
block create polygon 0,0 0,83.8 32,83.8 70,17.82 70,0


; GROUPING of BLOCKS
block group 'Rock mass=Slope'


; ORIENTATION of DISCONTINUITIES
; Spacing 5 times bigger than in reality

; K1 = Bedding planes at study site: 175/24, spacing 0.3m, persistence 5.1m
block cut joint-set angle 156 spacing 1.35 0.3 jointset-id 1
block joint-delete


; K4 = Joint set at study site: 125/66, spacing 0.6m, persistence 2.9m
block cut joint-set angle 116 spacing 3.15 0.8 jointset-id 4
block joint-delete


; K3 = Joint set at study site: 293/69, spacing 0.5m, persistence 2.5m
block cut joint-set angle 69 spacing 2.7 0.6 jointset-id 3
block joint-delete


; FINITE ELEMENT MESH - ZONES
block zone generate edge 1.5
;

; Grouping and Materials for joints potentially not assigned
block contact group 'Joints=all' range group 'Rock mass=Slope'
block contact cmodel assign area stiffness-shear 10000 stiffness-normal 26000 friction 31.9 cohesion 1 range group 'Joints=all'


; GROUPING / Material PROPERTIES for DISCONTINUITIES (ice-filled)
; assuming a joint persistence of 90% because rock bridges have already been destroyed
; start with minus 4 degrees for all

block contact group 'Joints=K1' range jointset-id 1 group 'Rock mass=Slope'
block contact cmodel assign area stiffness-shear 10000 stiffness-normal 26000 friction 31.9 cohesion 1 range group 'Joints=K1'
;
block contact group 'Joints=K3' range jointset-id 3 group 'Rock mass=Slope'
block contact cmodel assign area stiffness-shear 4300 stiffness-normal 11100 friction 31.9 cohesion 1 range group 'Joints=K3'
;
block contact group 'Joints=K4' range jointset-id 4 group 'Rock mass=Slope'
block contact cmodel assign area stiffness-shear 5000 stiffness-normal 13000 friction 31.9 cohesion 1 range group 'Joints=K4'


; Material properties of NEW CONTACTS
block contact cmodel default area stiffness-shear 10000 stiffness-normal 26000 friction 31.9 cohesion 1


; GROUPING / BLOCK PROPERTIES
block zone group 'zRock mass=Slope' range group 'Rock mass=Slope'
block zone cmodel assign mohr-coulomb range group 'zRock mass=Slope'
block zone property density [k1] bulk [k2] shear [k3] cohesion [k4] tension [k5] friction [k6] range group 'zRock mass=Slope'


; BOUNDARY CONDITIONS
; Initial stress state
model gravity 0 -9.81

block insitu stress-topography kox 0.5 koz 0.5


; Fixing velocities at boundaries
;Left edge
block gridpoint apply velocity-x 0 range position-x 0 tol 0.1
;Right edge
block gridpoint apply velocity-x 0 range position-x 70 tol 0.1
;base
block gridpoint apply velocity-x 0 range position-y 0 tol 0.1
block gridpoint apply velocity-y 0 range position-y 0 tol 0.1
;
;
;
; HISTORIES / OBSERVATION POINTS
;
block mechanical history unbalanced-maximum
model history unbalanced-force
model history solve-ratio

;

;block gridpoint history velocity-x 15 55
;block gridpoint history velocity-x 32 55
;block gridpoint history velocity-x 37.32 50
;block gridpoint history velocity-x 41.34 35
;block gridpoint history velocity-x 46.41 16
;
;block gridpoint history velocity-y 15 55
;block gridpoint history velocity-y 32 55
;block gridpoint history velocity-y 37.32 50
;block gridpoint history velocity-y 41.34 35
;block gridpoint history velocity-y 46.41 16
;
;block gridpoint history displacement-x 15 55
;block gridpoint history displacement-x 32 55
;block gridpoint history displacement-x 37.32 50
;block gridpoint history displacement-x 41.34 35
;block gridpoint history displacement-x 46.41 16
;
;block gridpoint history displacement-y 15 55
;block gridpoint history displacement-y 32 55
;block gridpoint history displacement-y 37.32 50
;block gridpoint history displacement-y 41.34 35
;block gridpoint history displacement-y 46.41 16


; CALCULATIONS
block solve elastic
model save ['mc_minus4_solveElastic_persis90_icefilled_60degr_rocktype'+string(nr)+'.sav']


; ---------------------------------------------------


; Assumption: current joint persistence is 90%

block contact reset displacement

; CHANGE PROPERTIES OF JOINTS: from 90% to 100% persistence

; All at minus 4 degrees
block contact cmodel assign area stiffness-shear 10000 stiffness-normal 26000 friction 30.5 cohesion 0.7 range group 'Joints=K1'
block contact cmodel assign area stiffness-shear 4300 stiffness-normal 11100 friction 30.5 cohesion 0.7 range group 'Joints=K3'
block contact cmodel assign area stiffness-shear 5000 stiffness-normal 13000 friction 30.5 cohesion 0.7 range group 'Joints=K4'

;
block cycle 15000
model save ['mc_warming0_persis100_icefilled_60degr_rocktype'+string(nr)+'.sav']


    end_command
    
io.out(k1)
io.out(k4)
io.out(k3)

end

return
