# Supplementary material for: Stability assessment of degrading permafrost rock slopes based on a coupled thermo-mechanical model
Source: Copernicus journal article supplement (doi:10.5194/esurf-2020-70), 2020-09-28
Supplement: Supplementary file 1 [file esurf-2020-70-supplement.zip › Suppl. material/Dataset S14. Numerical code for UDEC/UniversalModel_frozen_rocktype_60degr_fishcode.uddat]

; rock type -4
model new
program call 'UniversalModel_frozen_rocktype_60degr.uddat'
@rock_type(-4, 0.0025, 2500, 1500, 0.5, 0.3, 20)


; rock type -3
model new
program call 'UniversalModel_frozen_rocktype_60degr.uddat'
@rock_type(-3, 0.0025, 5000, 2500, 1, 0.4, 28)


; rock type -2
model new
program call 'UniversalModel_frozen_rocktype_60degr.uddat'
@rock_type(-2, 0.0026, 10000, 5000, 2, 0.5, 34)


; rock type -1
model new
program call 'UniversalModel_frozen_rocktype_60degr.uddat'
@rock_type(-1, 0.0027, 15000, 7500, 3, 0.75, 40)


; rock type 0
model new
program call 'UniversalModel_frozen_rocktype_60degr.uddat'
@rock_type(0, 0.0027, 20600, 9520, 3.9, 0.9, 44)


; rock type 1
model new
program call 'UniversalModel_frozen_rocktype_60degr.uddat'
@rock_type(1, 0.0027, 30000, 14000, 6, 1.5, 46)


; rock type 2
model new
program call 'UniversalModel_frozen_rocktype_60degr.uddat'
@rock_type(2, 0.0027, 41000, 19000, 8, 4, 48)


; rock type 3
model new
program call 'UniversalModel_frozen_rocktype_60degr.uddat'
@rock_type(3, 0.0028, 82000, 38000, 30, 8, 50)


; rock type 4 
model new
program call 'UniversalModel_frozen_rocktype_60degr.uddat'
@rock_type(4, 0.0029, 164000, 76000, 60, 16, 55)


; rock type 5
model new
program call 'UniversalModel_frozen_rocktype_60degr.uddat'
@rock_type(5, 0.0030, 328000, 152000, 90, 32, 60)
