# Supplementary material for: Stability assessment of degrading permafrost rock slopes based on a coupled thermo-mechanical model
Source: Copernicus journal article supplement (doi:10.5194/esurf-2020-70), 2020-09-28
Supplement: Supplementary file 1 [file esurf-2020-70-supplement.zip › Suppl. material/Dataset S14. Numerical code for UDEC/UniversalModel_geometries_diffslopeangles.uddat]

; Block geometry and fixed velocities at right edge for different slope angles

; Slope angle = 30 degree
block create polygon 0,0 0,83.8 32,83.8 146,17.82 146,0
block gridpoint apply velocity-x 0 range position-x 146 tol 0.1


; Slope angle = 40 degree
block create polygon 0,0 0,83.8 32,83.8 110,17.82 110,0
block gridpoint apply velocity-x 0 range position-x 110 tol 0.1


; Slope angle = 45 degree
block create polygon 0,0 0,83.8 32,83.8 100,17.82 100,0
block gridpoint apply velocity-x 0 range position-x 100 tol 0.1


; Slope angle = 50 degree
block create polygon 0,0 0,83.8 32,83.8 87,17.82 87,0
block gridpoint apply velocity-x 0 range position-x 87 tol 0.1


; Slope angle = 55 degree
block create polygon 0,0 0,83.8 32,83.8 78,17.82 78,0
block gridpoint apply velocity-x 0 range position-x 78 tol 0.1


; Slope angle = 57.5 degree
block create polygon 0,0 0,83.8 32,83.8 74,17.82 74,0
block gridpoint apply velocity-x 0 range position-x 74 tol 0.1


; Slope angle = 60 degree
block create polygon 0,0 0,83.8 32,83.8 70,17.82 70,0
block gridpoint apply velocity-x 0 range position-x 70 tol 0.1


; Slope angle = 62 degree
block create polygon 0,0 0,83.8 32,83.8 67.1,17.82 67.1,0
block gridpoint apply velocity-x 0 range position-x 67.1 tol 0.1


; Slope angle = 64 degree
block create polygon 0,0 0,83.8 32,83.8 64,17.82 64,0
block gridpoint apply velocity-x 0 range position-x 64 tol 0.1


; Slope angle = 65 degree
block create polygon 0,0 0,83.8 32,83.8 62.7,17.82 62.7,0
block gridpoint apply velocity-x 0 range position-x 62.7 tol 0.1


; Slope angle = 66 degree
block create polygon 0,0 0,83.8 32,83.8 61.4,17.82 61.4,0
block gridpoint apply velocity-x 0 range position-x 61.4 tol 0.1


; Slope angle = 69 degree
block create polygon 0,0 0,83.8 32,83.8 57.3,17.82 57.3,0
block gridpoint apply velocity-x 0 range position-x 57.3 tol 0.1
