# Supplementary material for: Stability assessment of degrading permafrost rock slopes based on a coupled thermo-mechanical model
Source: Copernicus journal article supplement (doi:10.5194/esurf-2020-70), 2020-09-28
Supplement: Supplementary file 1 [file esurf-2020-70-supplement.zip › Suppl. material/Dataset S14. Numerical code for UDEC/UniversalModel_jsorientation_60degrees_allorientations.dat]

; +0
model new
program call 'UniversalModel_jsorientation_basis_60degr.uddat'
@js_rotation(0, 156, 116, 69)


;+15
model new
program call 'UniversalModel_jsorientation_basis_60degr.uddat'
@js_rotation(15, 171, 131, 84)


;+30
model new
program call 'UniversalModel_jsorientation_basis_60degr.uddat'
@js_rotation(30, 186, 146, 99)


;+45
model new
program call 'UniversalModel_jsorientation_basis_60degr.uddat'
@js_rotation(45, 201, 161, 114)


;+60
model new
program call 'UniversalModel_jsorientation_basis_60degr.uddat'
@js_rotation(60, 216, 176, 129)


;+75
model new
program call 'UniversalModel_jsorientation_basis_60degr.uddat'
@js_rotation(75, 231, 191, 144)


;+90
model new
program call 'UniversalModel_jsorientation_basis_60degr.uddat'
@js_rotation(90, 246, 206, 159)


;+105
model new
program call 'UniversalModel_jsorientation_basis_60degr.uddat'
@js_rotation(105, 261, 221, 174)


;+120
model new
program call 'UniversalModel_jsorientation_basis_60degr.uddat'
@js_rotation(120, 276, 236, 189)


;+135
model new
program call 'UniversalModel_jsorientation_basis_60degr.uddat'
@js_rotation(135, 291, 251, 204)


;+150
model new
program call 'UniversalModel_jsorientation_basis_60degr.uddat'
@js_rotation(150, 306, 266, 219)


;+165
model new
program call 'UniversalModel_jsorientation_basis_60degr.uddat'
@js_rotation(165, 321, 281, 234)
