# Supplementary material for: Stability assessment of degrading permafrost rock slopes based on a coupled thermo-mechanical model
Source: Copernicus journal article supplement (doi:10.5194/esurf-2020-70), 2020-09-28
Supplement: Supplementary file 1 [file esurf-2020-70-supplement.zip › Suppl. material/Dataset S14. Numerical code for UDEC/UniversalModel_warming_60degr.dat]

model new

model restore 'mc_allfrozen_solveElastic_persis90_icefilled_60degr.sav'

fish define warming_icefilled(gradient)

command


; ALL JOINTS ARE FILLED WITH ICE
; Assumption: current joint persistence is 90%


block contact reset displacement

; CHANGE PROPERTIES OF JOINTS: from 90% to 100% persistence
; All at minus 4 degrees

block contact cmodel assign area stiffness-shear 10000 stiffness-normal 26000 friction 30.5 cohesion 0.7 range group 'Joints=K1'
block contact cmodel assign area stiffness-shear 4300 stiffness-normal 11100 friction 30.5 cohesion 0.7 range group 'Joints=K3'
block contact cmodel assign area stiffness-shear 5000 stiffness-normal 13000 friction 30.5 cohesion 0.7 range group 'Joints=K4'


block cycle 15000
model save ['mc_warming0_persis100_icefilled_'+string(gradient)+'degr_15kcyc_profile2.sav']


block factor-of-safety bracket 0.4 8 file ['mc_warming0_persis100_icefilled_'+string(gradient)+'degr_profile2_15kcyc_FoS.sav']
model save ['mc_warming0_persis100_icefilled_'+string(gradient)+'degr_profile2_15kcyc_FoS.sav']

end_command

end

@warming_icefilled(60)


; -------------------------------------------------------------------------------------
; WARMING STEP 1


model restore 'mc_warming0_persis100_icefilled_30degr_15kcyc_profile2.sav'

fish define warming_icefilled(gradient)

command

block contact reset displacement


; CHANGE PROPERTIES OF JOINTS: with persistence of 100%
; WARMING to minus 3 degrees


block contact cmodel assign area stiffness-shear 10000 stiffness-normal 26000 friction 30.5 cohesion 0.7 range group 'Joints=K1'
block contact cmodel assign area stiffness-shear 4300 stiffness-normal 11100 friction 30.5 cohesion 0.7 range group 'Joints=K3'
block contact cmodel assign area stiffness-shear 5000 stiffness-normal 13000 friction 30.5 cohesion 0.7 range group 'Joints=K4'

block cycle 3000


block contact cmodel assign area stiffness-shear 10000 stiffness-normal 26000 friction 26.4 cohesion 0.5 range group 'Joints=K1'
block contact cmodel assign area stiffness-shear 4300 stiffness-normal 11100 friction 26.4 cohesion 0.5 range group 'Joints=K3'
block contact cmodel assign area stiffness-shear 5000 stiffness-normal 13000 friction 26.4 cohesion 0.5 range group 'Joints=K4'
;
block cycle 12000
model save ['mc_warming1_persis100_icefilled_'+string(gradient)+'degr_15kcyc_profile2.sav']


block factor-of-safety bracket 0.4 8 file ['mc_warming1_persis100_icefilled_'+string(gradient)+'degr_profile2_15kcyc_FoS.sav']
model save ['mc_warming1_persis100_icefilled_'+string(gradient)+'degr_profile2_15kcyc_FoS.sav']

end_command
;
end
;
@warming_icefilled(60)


;---------------------------------------------------------
; WARMING STEP 2

model restore 'mc_warming1_persis100_icefilled_30degr_15kcyc_profile2.sav'

fish define warming_icefilled(gradient)

command

block contact reset displacement


; CHANGE PROPERTIES OF JOINTS: with persistence of 100%
; WARMING to minus 2 degrees

block contact cmodel assign area stiffness-shear 10000 stiffness-normal 26000 friction 30.5 cohesion 0.7 range group 'Joints=K1'
block contact cmodel assign area stiffness-shear 4300 stiffness-normal 11100 friction 30.5 cohesion 0.7 range group 'Joints=K3'
block contact cmodel assign area stiffness-shear 5000 stiffness-normal 13000 friction 30.5 cohesion 0.7 range group 'Joints=K4'

block cycle 3000


block contact cmodel assign area stiffness-shear 10000 stiffness-normal 26000 friction 26.4 cohesion 0.5 range group 'Joints=K1'
block contact cmodel assign area stiffness-shear 4300 stiffness-normal 11100 friction 26.4 cohesion 0.5 range group 'Joints=K3'
block contact cmodel assign area stiffness-shear 5000 stiffness-normal 13000 friction 26.4 cohesion 0.5 range group 'Joints=K4'
;
block cycle 3000


block contact cmodel assign area stiffness-shear 10000 stiffness-normal 26000 friction 22 cohesion 0.4 range group 'Joints=K1'
block contact cmodel assign area stiffness-shear 4300 stiffness-normal 11100 friction 22 cohesion 0.4 range group 'Joints=K3'
block contact cmodel assign area stiffness-shear 5000 stiffness-normal 13000 friction 22 cohesion 0.4 range group 'Joints=K4'

block cycle 9000
model save ['mc_warming2_persis100_icefilled_'+string(gradient)+'degr_15kcyc_profile2.sav']


block factor-of-safety bracket 0.4 6 file ['mc_warming2_persis100_icefilled_'+string(gradient)+'degr_profile2_15kcyc_FoS.sav']
model save ['mc_warming2_persis100_icefilled_'+string(gradient)+'degr_profile2_15kcyc_FoS.sav']

end_command
;
end
;
@warming_icefilled(60)


;---------------------------------------------------------
; WARMING STEP 3


model restore 'mc_warming2_persis100_icefilled_30degr_15kcyc_profile2.sav'

fish define warming_icefilled(gradient)

command

block contact reset displacement


; CHANGE PROPERTIES OF JOINTS: with persistence of 100%
; WARMING to minus 1 degrees

block contact cmodel assign area stiffness-shear 10000 stiffness-normal 26000 friction 30.5 cohesion 0.7 range group 'Joints=K1'
block contact cmodel assign area stiffness-shear 4300 stiffness-normal 11100 friction 30.5 cohesion 0.7 range group 'Joints=K3'
block contact cmodel assign area stiffness-shear 5000 stiffness-normal 13000 friction 30.5 cohesion 0.7 range group 'Joints=K4'

block cycle 3000


block contact cmodel assign area stiffness-shear 10000 stiffness-normal 26000 friction 26.4 cohesion 0.5 range group 'Joints=K1'
block contact cmodel assign area stiffness-shear 4300 stiffness-normal 11100 friction 26.4 cohesion 0.5 range group 'Joints=K3'
block contact cmodel assign area stiffness-shear 5000 stiffness-normal 13000 friction 26.4 cohesion 0.5 range group 'Joints=K4'
;
block cycle 3000


block contact cmodel assign area stiffness-shear 10000 stiffness-normal 26000 friction 22 cohesion 0.4 range group 'Joints=K1'
block contact cmodel assign area stiffness-shear 4300 stiffness-normal 11100 friction 22 cohesion 0.4 range group 'Joints=K3'
block contact cmodel assign area stiffness-shear 5000 stiffness-normal 13000 friction 22 cohesion 0.4 range group 'Joints=K4'

block cycle 3000


block contact cmodel assign area stiffness-shear 10000 stiffness-normal 26000 friction 16.8 cohesion 0.3 range group 'Joints=K1'
block contact cmodel assign area stiffness-shear 4300 stiffness-normal 11100 friction 16.8 cohesion 0.3 range group 'Joints=K3'
block contact cmodel assign area stiffness-shear 5000 stiffness-normal 13000 friction 16.8 cohesion 0.3 range group 'Joints=K4'

block cycle 6000
model save ['mc_warming3_persis100_icefilled_'+string(gradient)+'degr_15kcyc_profile2.sav']


block factor-of-safety bracket 0.2 6 file ['mc_warming3_persis100_icefilled_'+string(gradient)+'degr_profile2_15kcyc_FoS.sav']
model save ['mc_warming3_persis100_icefilled_'+string(gradient)+'degr_profile2_15kcyc_FoS.sav']

end_command
;
end
;
@warming_icefilled(60)


;---------------------------------------------------------
; WARMING STEP 4

model restore 'mc_warming3_persis100_icefilled_30degr_15kcyc_profile2.sav'

fish define warming_icefilled(gradient)

command
block contact reset displacement


; CHANGE PROPERTIES OF JOINTS: with persistence of 100%, LAST STAGE wit ALL FROZEN!
; WARMING to minus 0.5 degrees

block contact cmodel assign area stiffness-shear 10000 stiffness-normal 26000 friction 30.5 cohesion 0.7 range group 'Joints=K1'
block contact cmodel assign area stiffness-shear 4300 stiffness-normal 11100 friction 30.5 cohesion 0.7 range group 'Joints=K3'
block contact cmodel assign area stiffness-shear 5000 stiffness-normal 13000 friction 30.5 cohesion 0.7 range group 'Joints=K4'

block cycle 3000


block contact cmodel assign area stiffness-shear 10000 stiffness-normal 26000 friction 26.4 cohesion 0.5 range group 'Joints=K1'
block contact cmodel assign area stiffness-shear 4300 stiffness-normal 11100 friction 26.4 cohesion 0.5 range group 'Joints=K3'
block contact cmodel assign area stiffness-shear 5000 stiffness-normal 13000 friction 26.4 cohesion 0.5 range group 'Joints=K4'
;
block cycle 3000


block contact cmodel assign area stiffness-shear 10000 stiffness-normal 26000 friction 22 cohesion 0.4 range group 'Joints=K1'
block contact cmodel assign area stiffness-shear 4300 stiffness-normal 11100 friction 22 cohesion 0.4 range group 'Joints=K3'
block contact cmodel assign area stiffness-shear 5000 stiffness-normal 13000 friction 22 cohesion 0.4 range group 'Joints=K4'

block cycle 3000


block contact cmodel assign area stiffness-shear 10000 stiffness-normal 26000 friction 16.8 cohesion 0.3 range group 'Joints=K1'
block contact cmodel assign area stiffness-shear 4300 stiffness-normal 11100 friction 16.8 cohesion 0.3 range group 'Joints=K3'
block contact cmodel assign area stiffness-shear 5000 stiffness-normal 13000 friction 16.8 cohesion 0.3 range group 'Joints=K4'

block cycle 3000


block contact cmodel assign area stiffness-shear 10000 stiffness-normal 26000 friction 13.5 cohesion 0.2 range group 'Joints=K1'
block contact cmodel assign area stiffness-shear 4300 stiffness-normal 11100 friction 13.5 cohesion 0.2 range group 'Joints=K3'
block contact cmodel assign area stiffness-shear 5000 stiffness-normal 13000 friction 13.5 cohesion 0.2 range group 'Joints=K4'

;
block cycle 3000
model save ['mc_warming4_persis100_icefilled_'+string(gradient)+'degr_15kcyc_profile2.sav']

;
block factor-of-safety bracket 0.2 6 file ['mc_warming4_persis100_icefilled_'+string(gradient)+'degr_profile2_15kcyc_FoS.sav']
model save ['mc_warming4_persis100_icefilled_'+string(gradient)+'degr_profile2_15kcyc_FoS.sav']


end_command

end

@warming_icefilled(60)


return
