# Supplementary material for: Stability assessment of degrading permafrost rock slopes based on a coupled thermo-mechanical model
Source: Copernicus journal article supplement (doi:10.5194/esurf-2020-70), 2020-09-28
Supplement: Supplementary file 1 [file esurf-2020-70-supplement.zip › Suppl. material/Dataset S14. Numerical code for UDEC/Zugspitze_stages1-4.dat]

model new
;
; INITIAL CONDITIONS
;
; ROUNDING of BLOCKS
block tolerance corner-round-length 0.1

;
; DAMPING METHOD
block mechanical damping global
;
;

; GEOMETRY of block with TOPOGRAPHY
;
block create polygon 0,0 0,50.04 2,51.09 4,51.97 6,53.14 8,53.74 10,54.38 12,56.49 14,58.65 16,61.07 18,63.81 20,66.86 &
22,68.24 24,71.77 26,76.27 28,78.06 30,82.24 32,83.80 34,82.38 36,81.53 38,81.07 40,79.96 42,78.26 &
44,77.57 46,75.74 48,74.42 50,73.25 52,71.51 54,70.58 56,69.70 58,68.23 60,66.75 62,65.59 64,64.00 &
66,62.50 68,60.40 70,59.33 72,57.46 74,55.51 76,54.34 78,52.46 80,49.95 82,48.54 84,46.64 86,44.61 &
88,42.42 90,38.82 92,32.52 94,30.92 96,29.40 98,21.52 100,17.82 100,0
;
;
;
; ORIENTATION of DISCONTINUITIES
; Spacing 5 times bigger than in reality

; K1 = Bedding planes at study site: 175/24, spacing 0.27m
block cut joint-set angle 156 spacing 1.35 0.3 jointset-id 1
block joint-delete
;

; Main Shear Plane
table 'mainshearzone_line_prof2' import 'mainshearzone_line_prof2.tab'
table 'mainshearzone_line_prof2' list

block cut table 'mainshearzone_line_prof2' jointset-id 2


; K4 = Joint set at study site: 125/66, spacing 0.63m
block cut joint-set angle 116 spacing 3.15 0.8 jointset-id 4
block joint-delete


; K3 = Joint set at study site: 293/69, spacing 0.54m
block cut joint-set angle 69 spacing 2.7 0.6 jointset-id 3
block joint-delete
;
;

; FINITE ELEMENT MESH - ZONES
block zone generate edge 1.5
;


; Material PROPERTIES for DISCONTINUITIES (not ice-filled)
; Joint persistence of 30% because many rock bridges are still existent
; FROZEN


; Grouping and Materials for joints potentially not assigned
block contact cmodel assign area stiffness-shear 10000 stiffness-normal 26000 friction 42.1 cohesion 2.7
;

block contact cmodel assign area stiffness-shear 10000 stiffness-normal 26000 friction 42.1 cohesion 2.7 range jointset-id 1
block contact cmodel assign area stiffness-shear 5000 stiffness-normal 13000 friction 42.1 cohesion 2.7 range jointset-id 2
block contact cmodel assign area stiffness-shear 4300 stiffness-normal 11100 friction 42.1 cohesion 2.7 range jointset-id 3
block contact cmodel assign area stiffness-shear 5000 stiffness-normal 13000 friction 42.1 cohesion 2.7 range jointset-id 4


; Material properties of NEW CONTACTS
block contact cmodel default area stiffness-shear 10000 stiffness-normal 26000 friction 42.1 cohesion 2.7


; FROZEN BLOCK PROPERTIES (WETTERSTEIN LIMESTONE)
block zone cmodel assign mohr-coulomb
block zone property density 0.0027 bulk 20600 shear 9520 cohesion 3.9 tension 0.9 friction 44
;


; BOUNDARY CONDITIONS
;
; Initial stress state
model gravity 0 -9.81

block insitu stress-topography kox 0.5 koz 0.5


; Fixing velocities at boundaries
; Left edge
block gridpoint apply velocity-x 0 range position-x 0 tol 0.1

; Right edge
block gridpoint apply velocity-x 0 range position-x 100 tol 0.1

; Base
block gridpoint apply velocity-x 0 range position-y 0 tol 0.1
block gridpoint apply velocity-y 0 range position-y 0 tol 0.1
;
;
;
; HISTORIES / OBSERVATION POINTS
;
block mechanical history unbalanced-maximum
model history unbalanced-force
model history solve-ratio

;
;block gridpoint history velocity-x 26 42.7
;block gridpoint history velocity-x 38 52.4
;block gridpoint history velocity-x 48 46.9
;block gridpoint history velocity-x 74 26.8
;block gridpoint history velocity-x 82 16.5
;
;block gridpoint history velocity-y 26 42.7
;block gridpoint history velocity-y 38 52.4
;block gridpoint history velocity-y 48 46.9
;block gridpoint history velocity-y 74 26.8
;block gridpoint history velocity-y 82 16.5
;
;block gridpoint history displacement-x 26 42.7
;block gridpoint history displacement-x 38 52.4
;block gridpoint history displacement-x 48 46.9
;block gridpoint history displacement-x 74 26.8
;block gridpoint history displacement-x 82 16.5
;
;block gridpoint history displacement-y 26 42.7
;block gridpoint history displacement-y 38 52.4
;block gridpoint history displacement-y 48 46.9
;block gridpoint history displacement-y 74 26.8
;block gridpoint history displacement-y 82 16.5


; CALCULATIONS

block solve elastic
model save 'mc_allfrozen_solveElastic_persis30_paralt2_profile2.sav'

;
;block factor-of-safety bracket 2 15 filename 'mc_allfrozen_persis30_profile2_fos.sav'
;model save 'mc_allfrozen_persis30_profile2_fos.sav'


; ------------------------------------------


; FIRST STEP OF INCREASE IN JOINT PERSISTENCE

model restore 'mc_allfrozen_solveElastic_persis30_paralt2_profile2.sav'

block contact reset displacement

; Material PROPERTIES for DISCONTINUITIES (not ice-filled)
; Joint persistence of 50% because many rock bridges are still existent
; FROZEN

block contact cmodel assign area stiffness-shear 10000 stiffness-normal 26000 friction 40.8 cohesion 2
;
block contact cmodel assign area stiffness-shear 10000 stiffness-normal 26000 friction 40.8 cohesion 2 range jointset-id 1
block contact cmodel assign area stiffness-shear 5000 stiffness-normal 13000 friction 40.8 cohesion 2 range jointset-id 2
block contact cmodel assign area stiffness-shear 4300 stiffness-normal 11100 friction 40.8 cohesion 2 range jointset-id 3
block contact cmodel assign area stiffness-shear 5000 stiffness-normal 13000 friction 40.8 cohesion 2 range jointset-id 4


; Material properties of NEW CONTACTS
block contact cmodel default area stiffness-shear 10000 stiffness-normal 26000 friction 40.8 cohesion 2


; CALCULATIONS
block cycle 5000
model save 'mc_allfrozen_persis50_paralt2_profile2.sav'

;
;block factor-of-safety bracket 1 10 file 'mc_allfrozen_persis50_paralt2_fos.sav'
;model save 'mc_allfrozen_persis50_paralt2_fos.sav'


; ------------------------------------------


; SECOND STEP OF INCREASE IN JOINT PERSISTENCE

model restore 'mc_allfrozen_persis50_paralt2_profile2.sav'

block contact reset displacement


; Material PROPERTIES for DISCONTINUITIES (not ice-filled)
; Joint persistence of 70% because many rock bridges are still existent
; FROZEN

block contact cmodel assign area stiffness-shear 10000 stiffness-normal 26000 friction 39.5 cohesion 1.2
;
block contact cmodel assign area stiffness-shear 10000 stiffness-normal 26000 friction 39.5 cohesion 1.2 range jointset-id 1
block contact cmodel assign area stiffness-shear 5000 stiffness-normal 13000 friction 39.5 cohesion 1.2 range jointset-id 2
block contact cmodel assign area stiffness-shear 4300 stiffness-normal 11100 friction 39.5 cohesion 1.2 range jointset-id 3
block contact cmodel assign area stiffness-shear 5000 stiffness-normal 13000 friction 39.5 cohesion 1.2 range jointset-id 4


; Material properties of NEW CONTACTS
block contact cmodel default area stiffness-shear 10000 stiffness-normal 26000 friction 39.5 cohesion 1.2


; CALCULATIONS
block cycle 5000
model save 'mc_allfrozen_persis70_paralt2_profile2.sav'


;block factor-of-safety bracket 1 10 file 'mc_allfrozen_persis70_paralt2_fos.sav'
;model save 'mc_allfrozen_persis70_paralt2_fos.sav'


; ------------------------------------------


; THIRD STEP OF INCREASE IN JOINT PERSISTENCE


model restore 'mc_allfrozen_persis70_paralt2_profile2.sav'


; GROUPING of BLOCKS
block group 'Rock mass=ThawLevel0'

; Grouping and Materials for joints potentially not assigned
block contact group 'Joints=all' range group 'Rock mass=ThawLevel0'
block contact cmodel assign area stiffness-shear 10000 stiffness-normal 26000 friction 38.2 cohesion 0.4 range group 'Joints=all'


; Layers for progressive warming or thawing
table 'ThawLevel0_Line_Prof2' import 'ThawLevel0_Line_Prof2.tab'
table 'ThawLevel1_Line_Prof2' import 'ThawLevel1_Line_Prof2.tab'
table 'ThawLevel2_Line_Prof2' import 'ThawLevel2_Line_Prof2.tab'
table 'ThawLevel3_Line_Prof2' import 'ThawLevel3_Line_Prof2.tab'
table 'ThawLevel4_Line_Prof2' import 'ThawLevel4_Line_Prof2.tab'

table 'ThawLevel0_Line_Prof2' list
table 'ThawLevel1_Line_Prof2' list
table 'ThawLevel2_Line_Prof2' list
table 'ThawLevel3_Line_Prof2' list
table 'ThawLevel4_Line_Prof2' list


block group 'Rock mass=frozen' range below table 'ThawLevel0_Line_Prof2'

block group 'Rock mass=ThawLevel1' range right 63,0 63,60 group 'Rock mass=ThawLevel0' not
block group 'Rock mass=ThawLevel1' range above table 'ThawLevel1_Line_Prof2' group 'Rock mass=ThawLevel0' not

block group 'Rock mass=ThawLevel2' range right 56,0 56,60 group 'Rock mass=ThawLevel0' not group 'Rock mass=ThawLevel1' not
block group 'Rock mass=ThawLevel2' range above table 'ThawLevel2_Line_Prof2' group 'Rock mass=ThawLevel0' not group 'Rock mass=ThawLevel1' not

block group 'Rock mass=ThawLevel3' range right 48,0 48,60 group 'Rock mass=ThawLevel0' not group 'Rock mass=ThawLevel1' not group 'Rock mass=ThawLevel2' not
block group 'Rock mass=ThawLevel3' range above table 'ThawLevel3_Line_Prof2' group 'Rock mass=ThawLevel0' not group 'Rock mass=ThawLevel1' not group 'Rock mass=ThawLevel2' not

block group 'Rock mass=ThawLevel4' range right 41,0 41,60 group 'Rock mass=ThawLevel0' not group 'Rock mass=ThawLevel1' not group 'Rock mass=ThawLevel2' not group 'Rock mass=ThawLevel3' not
block group 'Rock mass=ThawLevel4' range above table 'ThawLevel4_Line_Prof2' group 'Rock mass=ThawLevel0' not group 'Rock mass=ThawLevel1' not group 'Rock mass=ThawLevel2' not group 'Rock mass=ThawLevel3' not


; GROUPING / Material PROPERTIES for DISCONTINUITIES (NOT ice-filled)
; assuming a joint persistence of 90% because rock bridges have already been destroyed
; Shear zone has a persistence of 100%
; start with minus 4 degrees for all

; THAW LEVEL 0:
block contact group 'Joints=shear zone_ThawLevel0' range jointset-id 2 group 'Rock mass=ThawLevel0'
block contact cmodel assign area stiffness-shear 5000 stiffness-normal 13000 friction 37.6 cohesion 0 range group 'Joints=shear zone_ThawLevel0'
;
block contact group 'Joints=K1_ThawLevel0' range jointset-id 1 group 'Rock mass=ThawLevel0'
block contact cmodel assign area stiffness-shear 10000 stiffness-normal 26000 friction 38.2 cohesion 0.4 range group 'Joints=K1_ThawLevel0'
;
block contact group 'Joints=K3_ThawLevel0' range jointset-id 3 group 'Rock mass=ThawLevel0'
block contact cmodel assign area stiffness-shear 4300 stiffness-normal 11100 friction 38.2 cohesion 0.4 range group 'Joints=K3_ThawLevel0'
;
block contact group 'Joints=K4_ThawLevel0' range jointset-id 4 group 'Rock mass=ThawLevel0'
block contact cmodel assign area stiffness-shear 5000 stiffness-normal 13000 friction 38.2 cohesion 0.4 range group 'Joints=K4_ThawLevel0'


; THAW LEVEL 1:
block contact group 'Joints=shear zone_ThawLevel1' range jointset-id 2 group 'Rock mass=ThawLevel1'
block contact cmodel assign area stiffness-shear 5000 stiffness-normal 13000 friction 37.6 cohesion 0 range group 'Joints=shear zone_ThawLevel1'
;
block contact group 'Joints=K1_ThawLevel1' range jointset-id 1 group 'Rock mass=ThawLevel1'
block contact cmodel assign area stiffness-shear 10000 stiffness-normal 26000 friction 38.2 cohesion 0.4 range group 'Joints=K1_ThawLevel1'
;
block contact group 'Joints=K3_ThawLevel1' range jointset-id 3 group 'Rock mass=ThawLevel1'
block contact cmodel assign area stiffness-shear 4300 stiffness-normal 11100 friction 38.2 cohesion 0.4 range group 'Joints=K3_ThawLevel1'
;
block contact group 'Joints=K4_ThawLevel1' range jointset-id 4 group 'Rock mass=ThawLevel1'
block contact cmodel assign area stiffness-shear 5000 stiffness-normal 13000 friction 38.2 cohesion 0.4 range group 'Joints=K4_ThawLevel1'


; THAW LEVEL 2:
block contact group 'Joints=shear zone_ThawLevel2' range jointset-id 2 group 'Rock mass=ThawLevel2'
block contact cmodel assign area stiffness-shear 5000 stiffness-normal 13000 friction 37.6 cohesion 0 range group 'Joints=shear zone_ThawLevel2'
;
block contact group 'Joints=K1_ThawLevel2' range jointset-id 1 group 'Rock mass=ThawLevel2'
block contact cmodel assign area stiffness-shear 10000 stiffness-normal 26000 friction 38.2 cohesion 0.4 range group 'Joints=K1_ThawLevel2'
;
block contact group 'Joints=K3_ThawLevel2' range jointset-id 3 group 'Rock mass=ThawLevel2'
block contact cmodel assign area stiffness-shear 4300 stiffness-normal 11100 friction 38.2 cohesion 0.4 range group 'Joints=K3_ThawLevel2'
;
block contact group 'Joints=K4_ThawLevel2' range jointset-id 4 group 'Rock mass=ThawLevel2'
block contact cmodel assign area stiffness-shear 5000 stiffness-normal 13000 friction 38.2 cohesion 0.4 range group 'Joints=K4_ThawLevel2'


; THAW LEVEL 3:
block contact group 'Joints=K1_ThawLevel3' range jointset-id 1 group 'Rock mass=ThawLevel3'
block contact cmodel assign area stiffness-shear 10000 stiffness-normal 26000 friction 38.2 cohesion 0.4 range group 'Joints=K1_ThawLevel3'
;
block contact group 'Joints=K3_ThawLevel3' range jointset-id 3 group 'Rock mass=ThawLevel3'
block contact cmodel assign area stiffness-shear 4300 stiffness-normal 11100 friction 38.2 cohesion 0.4 range group 'Joints=K3_ThawLevel3'
;
block contact group 'Joints=K4_ThawLevel3' range jointset-id 4 group 'Rock mass=ThawLevel3'
block contact cmodel assign area stiffness-shear 5000 stiffness-normal 13000 friction 38.2 cohesion 0.4 range group 'Joints=K4_ThawLevel3'


; THAW LEVEL 4:
block contact group 'Joints=K1_ThawLevel4' range jointset-id 1 group 'Rock mass=ThawLevel4'
block contact cmodel assign area stiffness-shear 10000 stiffness-normal 26000 friction 38.2 cohesion 0.4 range group 'Joints=K1_ThawLevel4'
;
block contact group 'Joints=K3_ThawLevel4' range jointset-id 3 group 'Rock mass=ThawLevel4'
block contact cmodel assign area stiffness-shear 4300 stiffness-normal 11100 friction 38.2 cohesion 0.4 range group 'Joints=K3_ThawLevel4'
;
block contact group 'Joints=K4_ThawLevel4' range jointset-id 4 group 'Rock mass=ThawLevel4'
block contact cmodel assign area stiffness-shear 5000 stiffness-normal 13000 friction 38.2 cohesion 0.4 range group 'Joints=K4_ThawLevel4'
;

; FROZEN CORE:
block contact group 'Joints=K1_frozen' range jointset-id 1 group 'Rock mass=frozen'
block contact cmodel assign area stiffness-shear 10000 stiffness-normal 26000 friction 38.2 cohesion 0.4 range group 'Joints=K1_frozen'
;
block contact group 'Joints=K3_frozen' range jointset-id 3 group 'Rock mass=frozen'
block contact cmodel assign area stiffness-shear 4300 stiffness-normal 11100 friction 38.2 cohesion 0.4 range group 'Joints=K3_frozen'
;
block contact group 'Joints=K4_frozen' range jointset-id 4 group 'Rock mass=frozen'
block contact cmodel assign area stiffness-shear 5000 stiffness-normal 13000 friction 38.2 cohesion 0.4 range group 'Joints=K4_frozen'


; Material properties of NEW CONTACTS
block contact cmodel default area stiffness-shear 10000 stiffness-normal 26000 friction 38.2 cohesion 0.4


; GROUPING / BLOCK PROPERTIES 

; THAW LEVEL 0
block zone group 'zRock mass=ThawLevel0' range group 'Rock mass=ThawLevel0'
block zone cmodel assign mohr-coulomb range group 'zRock mass=ThawLevel0'
block zone property density 0.0027 bulk 20600 shear 9520 cohesion 3.9 tension 0.9 friction 44 range group 'zRock mass=ThawLevel0'

; THAW LEVEL 1
block zone group 'zRock mass=ThawLevel1' range group 'Rock mass=ThawLevel1'
block zone cmodel assign mohr-coulomb range group 'zRock mass=ThawLevel1'
block zone property density 0.0027 bulk 20600 shear 9520 cohesion 3.9 tension 0.9 friction 44 range group 'zRock mass=ThawLevel1'
;
; THAW LEVEL 2
block zone group 'zRock mass=ThawLevel2' range group 'Rock mass=ThawLevel2'
block zone cmodel assign mohr-coulomb range group 'zRock mass=ThawLevel2'
block zone property density 0.0027 bulk 20600 shear 9520 cohesion 3.9 tension 0.9 friction 44 range group 'zRock mass=ThawLevel2'

; THAW LEVEL 3
block zone group 'zRock mass=ThawLevel3' range group 'Rock mass=ThawLevel3'
block zone cmodel assign mohr-coulomb range group 'zRock mass=ThawLevel3'
block zone property density 0.0027 bulk 20600 shear 9520 cohesion 3.9 tension 0.9 friction 44 range group 'zRock mass=ThawLevel3'

; THAW LEVEL 4
block zone group 'zRock mass=ThawLevel4' range group 'Rock mass=ThawLevel4'
block zone cmodel assign mohr-coulomb range group 'zRock mass=ThawLevel4'
block zone property density 0.0027 bulk 20600 shear 9520 cohesion 3.9 tension 0.9 friction 44 range group 'zRock mass=ThawLevel4'

; FROZEN CORE
block zone group 'zRock mass=frozen' range group 'Rock mass=frozen'
block zone cmodel assign mohr-coulomb range group 'zRock mass=frozen'
block zone property density 0.0027 bulk 20600 shear 9520 cohesion 3.9 tension 0.9 friction 44 range group 'zRock mass=frozen'


; CALCULATIONS
block cycle 5000
model save 'mc_allfrozen_persis90_noice_paralt2_profile2.sav'


;block factor-of-safety bracket 2 15 filename 'mc_allfrozen_persis90_noice_profile2_fos.sav'
;model save 'mc_allfrozen_persis90_noice_profile2_fos.sav'

return
