# Supplementary material for: Stability assessment of degrading permafrost rock slopes based on a coupled thermo-mechanical model
Source: Copernicus journal article supplement (doi:10.5194/esurf-2020-70), 2020-09-28
Supplement: Supplementary file 1 [file esurf-2020-70-supplement.zip › Suppl. material/Dataset S14. Numerical code for UDEC/Zugspitze_stages5-9_warming.dat]

; ALL JOINTS WILL BE FILLED WITH ICE

; Assumption: current joint persistence is 90%
model restore 'mc_allfrozen_persis90_noice_paralt2_profile2.sav'

block contact reset displacement


; CHANGE PROPERTIES OF JOINTS: from ice-free to ice-filled state, with persistence of 100%; ALL FROZEN!
; Shear zone has persistence of 100%

; THAW LEVEL 0: minus 4 degrees
block contact cmodel assign area stiffness-shear 5000 stiffness-normal 13000 friction 30.5 cohesion 0.7 range group 'Joints=shear zone_ThawLevel0'
block contact cmodel assign area stiffness-shear 10000 stiffness-normal 26000 friction 30.5 cohesion 0.7 range group 'Joints=K1_ThawLevel0'
block contact cmodel assign area stiffness-shear 4300 stiffness-normal 11100 friction 30.5 cohesion 0.7 range group 'Joints=K3_ThawLevel0'
block contact cmodel assign area stiffness-shear 5000 stiffness-normal 13000 friction 30.5 cohesion 0.7 range group 'Joints=K4_ThawLevel0'


; THAW LEVEL 1: minus 4 degrees
block contact cmodel assign area stiffness-shear 5000 stiffness-normal 13000 friction 30.5 cohesion 0.7 range group 'Joints=shear zone_ThawLevel1'
block contact cmodel assign area stiffness-shear 10000 stiffness-normal 26000 friction 30.5 cohesion 0.7 range group 'Joints=K1_ThawLevel1'
block contact cmodel assign area stiffness-shear 4300 stiffness-normal 11100 friction 30.5 cohesion 0.7 range group 'Joints=K3_ThawLevel1'
block contact cmodel assign area stiffness-shear 5000 stiffness-normal 13000 friction 30.5 cohesion 0.7 range group 'Joints=K4_ThawLevel1'


; THAW LEVEL 2: minus 4 degrees
block contact cmodel assign area stiffness-shear 5000 stiffness-normal 13000 friction 30.5 cohesion 0.7 range group 'Joints=shear zone_ThawLevel2'
block contact cmodel assign area stiffness-shear 10000 stiffness-normal 26000 friction 30.5 cohesion 0.7 range group 'Joints=K1_ThawLevel2'
block contact cmodel assign area stiffness-shear 4300 stiffness-normal 11100 friction 30.5 cohesion 0.7 range group 'Joints=K3_ThawLevel2'
block contact cmodel assign area stiffness-shear 5000 stiffness-normal 13000 friction 30.5 cohesion 0.7 range group 'Joints=K4_ThawLevel2'


; THAW LEVEL 3: minus 4 degrees
block contact cmodel assign area stiffness-shear 10000 stiffness-normal 26000 friction 30.5 cohesion 0.7 range group 'Joints=K1_ThawLevel3'
block contact cmodel assign area stiffness-shear 4300 stiffness-normal 11100 friction 30.5 cohesion 0.7 range group 'Joints=K3_ThawLevel3'
block contact cmodel assign area stiffness-shear 5000 stiffness-normal 13000 friction 30.5 cohesion 0.7 range group 'Joints=K4_ThawLevel3'


; THAW LEVEL 4: minus 4 degrees
block contact cmodel assign area stiffness-shear 10000 stiffness-normal 26000 friction 30.5 cohesion 0.7 range group 'Joints=K1_ThawLevel4'
block contact cmodel assign area stiffness-shear 4300 stiffness-normal 11100 friction 30.5 cohesion 0.7 range group 'Joints=K3_ThawLevel4'
block contact cmodel assign area stiffness-shear 5000 stiffness-normal 13000 friction 30.5 cohesion 0.7 range group 'Joints=K4_ThawLevel4'
;

; FROZEN CORE: minus 4 degrees
block contact cmodel assign area stiffness-shear 10000 stiffness-normal 26000 friction 30.5 cohesion 0.7 range group 'Joints=K1_frozen'
block contact cmodel assign area stiffness-shear 4300 stiffness-normal 11100 friction 30.5 cohesion 0.7 range group 'Joints=K3_frozen'
block contact cmodel assign area stiffness-shear 5000 stiffness-normal 13000 friction 30.5 cohesion 0.7 range group 'Joints=K4_frozen'

;
;
block cycle 3000
model save 'mc_warming0_persis100_icefilled_profile2.sav'


block factor-of-safety bracket 1 6 filename 'mc_warming0_persis100_icefilled_profile2_FoS.sav'
model save 'mc_warming0_persis100_icefilled_profile2_FoS.sav'


;-------------------------------------------------------------------------------------
; WARMING STEP 1


model restore 'mc_warming0_persis100_icefilled_profile2.sav'

block contact reset displacement


; CHANGE PROPERTIES OF JOINTS: with persistence of 100%
; Shear zone has persistence of 100%

; THAW LEVEL 0: minus 3 degrees
block contact cmodel assign area stiffness-shear 5000 stiffness-normal 13000 friction 26.4 cohesion 0.5 range group 'Joints=shear zone_ThawLevel0'
block contact cmodel assign area stiffness-shear 10000 stiffness-normal 26000 friction 26.4 cohesion 0.5 range group 'Joints=K1_ThawLevel0'
block contact cmodel assign area stiffness-shear 4300 stiffness-normal 11100 friction 26.4 cohesion 0.5 range group 'Joints=K3_ThawLevel0'
block contact cmodel assign area stiffness-shear 5000 stiffness-normal 13000 friction 26.4 cohesion 0.5 range group 'Joints=K4_ThawLevel0'
;

block cycle 3000
model save 'mc_warming1_persis100_icefilled_profile2.sav'


;---------------------------------------------------------
; WARMING STEP 2


model restore 'mc_warming1_persis100_icefilled_profile2.sav'

block contact reset displacement


; CHANGE PROPERTIES OF JOINTS: with persistence of 100%
; Shear zone has persistence of 100%

; THAW LEVEL 0: minus 2 degrees
block contact cmodel assign area stiffness-shear 5000 stiffness-normal 13000 friction 22 cohesion 0.4 range group 'Joints=shear zone_ThawLevel0'
block contact cmodel assign area stiffness-shear 10000 stiffness-normal 26000 friction 22 cohesion 0.4 range group 'Joints=K1_ThawLevel0'
block contact cmodel assign area stiffness-shear 4300 stiffness-normal 11100 friction 22 cohesion 0.4 range group 'Joints=K3_ThawLevel0'
block contact cmodel assign area stiffness-shear 5000 stiffness-normal 13000 friction 22 cohesion 0.4 range group 'Joints=K4_ThawLevel0'


; THAW LEVEL 1: minus 3 degrees
block contact cmodel assign area stiffness-shear 5000 stiffness-normal 13000 friction 26.4 cohesion 0.5 range group 'Joints=shear zone_ThawLevel1'
block contact cmodel assign area stiffness-shear 10000 stiffness-normal 26000 friction 26.4 cohesion 0.5 range group 'Joints=K1_ThawLevel1'
block contact cmodel assign area stiffness-shear 4300 stiffness-normal 11100 friction 26.4 cohesion 0.5 range group 'Joints=K3_ThawLevel1'
block contact cmodel assign area stiffness-shear 5000 stiffness-normal 13000 friction 26.4 cohesion 0.5 range group 'Joints=K4_ThawLevel1'

;
;
block cycle 3000
model save 'mc_warming2_persis100_icefilled_profile2.sav'


;---------------------------------------------------------
; WARMING STEP 3


model restore 'mc_warming2_persis100_icefilled_profile2.sav'

block contact reset displacement


; CHANGE PROPERTIES OF JOINTS: with persistence of 100%
; Shear zone has persistence of 100%

; THAW LEVEL 0: minus 1 degrees
block contact cmodel assign area stiffness-shear 5000 stiffness-normal 13000 friction 16.8 cohesion 0.3 range group 'Joints=shear zone_ThawLevel0'
block contact cmodel assign area stiffness-shear 10000 stiffness-normal 26000 friction 16.8 cohesion 0.3 range group 'Joints=K1_ThawLevel0'
block contact cmodel assign area stiffness-shear 4300 stiffness-normal 11100 friction 16.8 cohesion 0.3 range group 'Joints=K3_ThawLevel0'
block contact cmodel assign area stiffness-shear 5000 stiffness-normal 13000 friction 16.8 cohesion 0.3 range group 'Joints=K4_ThawLevel0'


; THAW LEVEL 1: minus 2 degrees
block contact cmodel assign area stiffness-shear 5000 stiffness-normal 13000 friction 22 cohesion 0.4 range group 'Joints=shear zone_ThawLevel1'
block contact cmodel assign area stiffness-shear 10000 stiffness-normal 26000 friction 22 cohesion 0.4 range group 'Joints=K1_ThawLevel1'
block contact cmodel assign area stiffness-shear 4300 stiffness-normal 11100 friction 22 cohesion 0.4 range group 'Joints=K3_ThawLevel1'
block contact cmodel assign area stiffness-shear 5000 stiffness-normal 13000 friction 22 cohesion 0.4 range group 'Joints=K4_ThawLevel1'


; THAW LEVEL 2: minus 3 degrees
block contact cmodel assign area stiffness-shear 5000 stiffness-normal 13000 friction 26.4 cohesion 0.5 range group 'Joints=shear zone_ThawLevel1'
block contact cmodel assign area stiffness-shear 10000 stiffness-normal 26000 friction 26.4 cohesion 0.5 range group 'Joints=K1_ThawLevel2'
block contact cmodel assign area stiffness-shear 4300 stiffness-normal 11100 friction 26.4 cohesion 0.5 range group 'Joints=K3_ThawLevel2'
block contact cmodel assign area stiffness-shear 5000 stiffness-normal 13000 friction 26.4 cohesion 0.5 range group 'Joints=K4_ThawLevel2'

;
;
block cycle 3000
model save 'mc_warming3_persis100_icefilled_profile2.sav'


;---------------------------------------------------------
; WARMING STEP 4


model restore 'mc_warming3_persis100_icefilled_profile2.sav'

block contact reset displacement


; CHANGE PROPERTIES OF JOINTS: with persistence of 100%, LAST STAGE wit ALL FROZEN!
; Shear zone has persistence of 100%

; THAW LEVEL 0: minus 0.5 degrees
block contact cmodel assign area stiffness-shear 5000 stiffness-normal 13000 friction 13.5 cohesion 0.2 range group 'Joints=shear zone_ThawLevel0'
block contact cmodel assign area stiffness-shear 10000 stiffness-normal 26000 friction 13.5 cohesion 0.2 range group 'Joints=K1_ThawLevel0'
block contact cmodel assign area stiffness-shear 4300 stiffness-normal 11100 friction 13.5 cohesion 0.2 range group 'Joints=K3_ThawLevel0'
block contact cmodel assign area stiffness-shear 5000 stiffness-normal 13000 friction 13.5 cohesion 0.2 range group 'Joints=K4_ThawLevel0'


; THAW LEVEL 1: minus 1 degrees
block contact cmodel assign area stiffness-shear 5000 stiffness-normal 13000 friction 16.8 cohesion 0.3 range group 'Joints=shear zone_ThawLevel1'
block contact cmodel assign area stiffness-shear 10000 stiffness-normal 26000 friction 16.8 cohesion 0.3 range group 'Joints=K1_ThawLevel1'
block contact cmodel assign area stiffness-shear 4300 stiffness-normal 11100 friction 16.8 cohesion 0.3 range group 'Joints=K3_ThawLevel1'
block contact cmodel assign area stiffness-shear 5000 stiffness-normal 13000 friction 16.8 cohesion 0.3 range group 'Joints=K4_ThawLevel1'


; THAW LEVEL 2: minus 2 degrees
block contact cmodel assign area stiffness-shear 5000 stiffness-normal 13000 friction 22 cohesion 0.4 range group 'Joints=shear zone_ThawLevel2'
block contact cmodel assign area stiffness-shear 10000 stiffness-normal 26000 friction 22 cohesion 0.4 range group 'Joints=K1_ThawLevel2'
block contact cmodel assign area stiffness-shear 4300 stiffness-normal 11100 friction 22 cohesion 0.4 range group 'Joints=K3_ThawLevel2'
block contact cmodel assign area stiffness-shear 5000 stiffness-normal 13000 friction 22 cohesion 0.4 range group 'Joints=K4_ThawLevel2'


; THAW LEVEL 3: minus 3 degrees
block contact cmodel assign area stiffness-shear 10000 stiffness-normal 26000 friction 26.4 cohesion 0.5 range group 'Joints=K1_ThawLevel3'
block contact cmodel assign area stiffness-shear 4300 stiffness-normal 11100 friction 26.4 cohesion 0.5 range group 'Joints=K3_ThawLevel3'
block contact cmodel assign area stiffness-shear 5000 stiffness-normal 13000 friction 26.4 cohesion 0.5 range group 'Joints=K4_ThawLevel3'


;
block cycle 3000
model save 'mc_warming4_persis100_icefilled_profile2.sav'


block factor-of-safety bracket 1 15 filename 'mc_warming4_persis100_icefilled_profile2_fos.sav'
model save 'mc_warming4_persis100_icefilled_profile2_fos.sav'

return
